# Supplementary material for: Maternal diet quality and associations with plasma lipid profiles and pregnancy-related cardiometabolic health
Source: Eur J Nutr. 2023 Aug 30;62(8):3369–81. doi: 10.1007/s00394-023-03244-3 (PMC10611854; doi:10.1007/s00394-023-03244-3)
Supplement: Supplementary file 2 — Supplementary file2 (XLSX 420 KB) [file 394_2023_3244_MOESM2_ESM.xlsx]

## Sheet: FDR 0.05 lipids_v1
Lipid DV	p (sorted)	k	H-B	p > h-b	B-H (m=698)	p < b-h		k	p-values	B-H (m=698)		m	FDR		Lipid DV	p-value	B	95% LL	95% UL
AC181	0.00179771	1	7.16332e-05	yes	7.16332e-05			1	lowest p-value	7.16332e-05		698	0.05		AC120	0.515733	-0.00409125	-0.0164854	0.00830287
TG524NL161	0.00205528	2	7.1736e-05	yes	0.000143266			2	…	0.000143266					AC130	0.221327	0.00809583	-0.00491909	0.0211108
Cerd181190	0.00540714	3	7.18391e-05	yes	0.0002149			3	…	0.0002149					AC140	0.127589	-0.00957554	-0.0219179	0.00276687
SMd182160	0.0075155	4	7.19424e-05	yes	0.000286533			4	…	0.000286533					AC141	0.0125372	-0.0135324	-0.0241219	-0.00294293
AC161	0.0082233	5	7.20461e-05	yes	0.000358166			5	…	0.000358166					AC142	0.334684	-0.00619711	-0.0188364	0.00644221
SMd182200	0.00822848	6	7.21501e-05	yes	0.000429799			6	…	0.000429799					AC150a	0.191839	0.00818942	-0.00414405	0.0205229
TGO502NL182	0.00968951	7	7.22543e-05	yes	0.000501433			7	…	0.000501433					AC150b	0.576934	-0.00430199	-0.0194876	0.0108836
AC160	0.0116832	8	7.23589e-05	yes	0.000573066			8	…	0.000573066					AC160	0.0116832	-0.0187194	-0.0332206	-0.00421815
LPC171sn1b	0.011882	9	7.24638e-05	yes	0.000644699			9	…	0.000644699					AC161	0.0082233	-0.0161993	-0.0281629	-0.0042358
AC141	0.0125372	10	7.25689e-05	yes	0.000716332			10	…	0.000716332					AC170a	0.667323	-0.00336696	-0.0187951	0.0120612
PC200_204	0.0134251	11	7.26744e-05	yes	0.000787966			11	…	0.000787966					AC170b	0.985151	-0.0001486	-0.015879	0.0155818
GM3d181200	0.0156236	12	7.27802e-05	yes	0.000859599			12	…	0.000859599					AC180	0.210267	-0.00939983	-0.0241499	0.00535022
Sulfatided181180	0.0156247	13	7.28863e-05	yes	0.000931232			13	…	0.000931232					AC181	0.00179771	-0.021176	-0.0343663	-0.00798573
SMd182220	0.0157731	14	7.29927e-05	yes	0.00100287			14	…	0.00100287					AC182	0.0351316	-0.0140397	-0.0270903	-0.00098919
SMd182180	0.0158766	15	7.30994e-05	yes	0.0010745			15	…	0.0010745					CE140	0.0563931	0.01324	-0.00036435	0.0268444
Cerm181200	0.0167206	16	7.32064e-05	yes	0.00114613			16	…	0.00114613					CE150	0.19686	0.0087351	-0.00456955	0.0220398
PE180_204	0.0193811	17	7.33138e-05	yes	0.00121777			17	…	0.00121777					CE160	0.964233	-0.00035207	-0.015819	0.0151148
TG524NL183	0.0249467	18	7.34214e-05	yes	0.0012894			18	…	0.0012894					CE161	0.609199	0.00301142	-0.00858945	0.0146123
SMd182181	0.0251222	19	7.35294e-05	yes	0.00136103			19	…	0.00136103					CE162	0.0514582	0.014335	-9.165e-05	0.0287617
PC181_203	0.0252701	20	7.36377e-05	yes	0.00143266			20	…	0.00143266					CE170	0.518832	0.00440256	-0.00903379	0.0178389
Cerd181200	0.0277306	21	7.37463e-05	yes	0.0015043			21	…	0.0015043					CE171	0.579566	0.0034475	-0.00880649	0.0157015
S1Pd180	0.0295322	22	7.38552e-05	yes	0.00157593			22	…	0.00157593					CE180	0.702745	-0.00267852	-0.0165033	0.0111462
CE205	0.0306373	23	7.39645e-05	yes	0.00164756			23	…	0.00164756					CE181	0.333756	-0.00726668	-0.0220589	0.00752557
TG566NL204	0.0320336	24	7.40741e-05	yes	0.0017192			24	…	0.0017192					CE182	0.376004	-0.00724577	-0.0233531	0.00886156
AC182	0.0351316	25	7.4184e-05	yes	0.00179083			25	…	0.00179083					CE183	0.660252	0.00254097	-0.0088442	0.0139261
TG546NL204	0.0358571	26	7.42942e-05	yes	0.00186246			26	…	0.00186246					CE200	0.410004	-0.00514295	-0.0174297	0.00714381
PEP160183	0.0410433	27	7.44048e-05	yes	0.0019341			27	…	0.0019341					CE201	0.172769	-0.00900202	-0.0219776	0.00397359
PEP190204a	0.0417117	28	7.45156e-05	yes	0.00200573			28	…	0.00200573					CE202	0.209615	-0.00814683	-0.0209124	0.0046187
DG181_181	0.0422382	29	7.46269e-05	yes	0.00207736			29	…	0.00207736					CE203	0.22061	-0.0082423	-0.021472	0.00498744
TG522NL160	0.0444585	30	7.47384e-05	yes	0.002149			30	…	0.002149					CE204	0.161144	0.0105364	-0.00423835	0.0253113
SMd181241	0.0447848	31	7.48503e-05	yes	0.00222063			31	…	0.00222063					CE205	0.0306373	0.0163038	0.0015383	0.0310692
PEP170226a	0.0493716	32	7.49625e-05	yes	0.00229226			32	…	0.00229226					CE220	0.365157	-0.00506968	-0.0160864	0.00594706
CE162	0.0514582	33	7.50751e-05	yes	0.0023639			33	…	0.0023639					CE221	0.242612	-0.00649137	-0.0174158	0.00443307
PE385a	0.0540918	34	7.5188e-05	yes	0.00243553			34	…	0.00243553					CE224	0.286143	-0.00706536	-0.0200952	0.00596453
HexCerd182220	0.0548319	35	7.53012e-05	yes	0.00250716			35	…	0.00250716					CE225n3	0.3798	0.0059666	-0.00740337	0.0193366
TG523NL182	0.0552461	36	7.54148e-05	yes	0.0025788			36	…	0.0025788					CE225n6	0.904902	0.00079268	-0.0122781	0.0138634
CE140	0.0563931	37	7.55287e-05	yes	0.00265043			37	…	0.00265043					CE226	0.606389	0.00338447	-0.00955174	0.0163207
PC180_203	0.0575809	38	7.5643e-05	yes	0.00272206			38	…	0.00272206					CE240	0.0588016	-0.00963592	-0.0196339	0.00036204
PEP150204a	0.0581339	39	7.57576e-05	yes	0.0027937			39	…	0.0027937					CE241	0.407221	-0.0053301	-0.0179881	0.00732793
CE240	0.0588016	40	7.58725e-05	yes	0.00286533			40	…	0.00286533					CE244	0.0607314	-0.0113149	-0.0231449	0.00051504
Sulfatided181240	0.0596111	41	7.59878e-05	yes	0.00293696			41	…	0.00293696					CE245	0.513555	-0.00413828	-0.01661	0.00833347
CE244	0.0607314	42	7.61035e-05	yes	0.0030086			42	…	0.0030086					CE246	0.0867811	0.0109926	-0.00160282	0.0235879
PEP150226a	0.0638933	43	7.62195e-05	yes	0.00308023			43	…	0.00308023					COH	0.330762	-0.00806521	-0.0243814	0.00825094
PC310a	0.06507	44	7.63359e-05	yes	0.00315186			44	…	0.00315186					Cer1Pd181160	0.46787	-0.00420429	-0.0156057	0.00719708
DE204	0.0650978	45	7.64526e-05	yes	0.0032235			45	…	0.0032235					Cerd161160	0.15538	0.00996833	-0.00381648	0.0237531
PC160_183b	0.0657579	46	7.65697e-05	yes	0.00329513			46	…	0.00329513					Cerd161180	0.829666	-0.0014525	-0.0147528	0.0118478
Cerd182180	0.06807	47	7.66871e-05	yes	0.00336676			47	…	0.00336676					Cerd161200	0.609001	-0.00340484	-0.016514	0.00970434
LPI204sn2	0.0685643	48	7.68049e-05	yes	0.0034384			48	…	0.0034384					Cerd161220	0.694936	0.00271063	-0.0109034	0.0163247
TGO544NL182	0.0693318	49	7.69231e-05	yes	0.00351003			49	…	0.00351003					Cerd161230	0.281357	0.00734773	-0.00606848	0.0207639
HexCerd182240	0.0698224	50	7.70416e-05	yes	0.00358166			50	…	0.00358166					Cerd161240	0.11848	0.0106705	-0.00275078	0.0240918
PEP180205	0.071441	51	7.71605e-05	yes	0.0036533			51	…	0.0036533					Cerd161241	0.300606	0.00697863	-0.00628422	0.0202415
TG501NL140	0.0720222	52	7.72798e-05	yes	0.00372493			52	…	0.00372493					Cerd171160	0.962351	0.00035373	-0.014409	0.0151164
TG567NL225b	0.0723926	53	7.73994e-05	yes	0.00379656			53	…	0.00379656					Cerd171180	0.623043	0.00380142	-0.0114293	0.0190321
PI180_226	0.0727277	54	7.75194e-05	yes	0.00386819			54	…	0.00386819					Cerd171200	0.932951	-0.00058353	-0.0142471	0.01308
LPI180sn1	0.0728323	55	7.76398e-05	yes	0.00393983			55	…	0.00393983					Cerd171220	0.766985	-0.00211542	-0.0161778	0.0119469
PEP170226b	0.0745649	56	7.77605e-05	yes	0.00401146			56	…	0.00401146					Cerd171230	0.586144	0.00364043	-0.00952736	0.0168082
TG567NL225a	0.0751052	57	7.78816e-05	yes	0.00408309			57	…	0.00408309					Cerd171240	0.570339	0.00390032	-0.00963237	0.017433
TG566NL225a	0.0754383	58	7.80031e-05	yes	0.00415473			58	…	0.00415473					Cerd171241	0.867216	0.00120638	-0.0130076	0.0154204
TG566NL225b	0.0754383	59	7.8125e-05	yes	0.00422636			59	…	0.00422636					Cerd181140	0.525658	-0.0041388	-0.0169794	0.00870177
LPCP170b	0.0760742	60	7.82473e-05	yes	0.00429799			60	…	0.00429799					Cerd181160	0.517753	-0.00486195	-0.0196621	0.00993816
TG521NL181	0.0768875	61	7.83699e-05	yes	0.00436963			61	…	0.00436963					Cerd181170	0.402978	-0.00591052	-0.0198205	0.00799946
PEP181224	0.0806082	62	7.84929e-05	yes	0.00444126			62	…	0.00444126					Cerd181180	0.130602	-0.0108048	-0.0248425	0.00323281
PEP181205b	0.0807201	63	7.86164e-05	yes	0.00451289			63	…	0.00451289					Cerd181190	0.00540714	-0.0176899	-0.0300892	-0.00529073
SMd181220SMd161240	0.0810962	64	7.87402e-05	yes	0.00458453			64	…	0.00458453					Cerd181200	0.0277306	-0.0156355	-0.0295396	-0.00173144
DG161_181	0.0815904	65	7.88644e-05	yes	0.00465616			65	…	0.00465616					Cerd181210	0.139051	-0.0106631	-0.0248218	0.00349564
PEP160225n6	0.0817097	66	7.89889e-05	yes	0.00472779			66	…	0.00472779					Cerd181220	0.185969	-0.0104972	-0.0260965	0.00510217
SMd181240	0.0832741	67	7.91139e-05	yes	0.00479943			67	…	0.00479943					Cerd181230	0.924182	0.00069422	-0.0136766	0.015065
PC160_204	0.0863547	68	7.92393e-05	yes	0.00487106			68	…	0.00487106					Cerd181240	0.252135	-0.007986	-0.0217002	0.00572824
PC385a	0.0864359	69	7.93651e-05	yes	0.00494269			69	…	0.00494269					Cerd181241	0.452765	-0.00516857	-0.0187201	0.00838295
CE246	0.0867811	70	7.94913e-05	yes	0.00501433			70	…	0.00501433					Cerd181260	0.606473	-0.00347633	-0.0167668	0.00981411
LPC190asn1104_sn1	0.088037	71	7.96178e-05	yes	0.00508596			71	…	0.00508596					Cerd182140	0.228301	-0.00724846	-0.0190785	0.00458155
SMd182140	0.0897584	72	7.97448e-05	yes	0.00515759			72	…	0.00515759					Cerd182160	0.111837	-0.0116624	-0.0260638	0.00273899
dhCerd180200	0.089801	73	7.98722e-05	yes	0.00522923			73	…	0.00522923					Cerd182170	0.438004	0.00507155	-0.0078005	0.0179436
SMd181180SMd161200	0.0902966	74	8e-05	yes	0.00530086			74	…	0.00530086					Cerd182180	0.06807	-0.0127807	-0.0265193	0.00095801
PI15MHDA_181PI170_181	0.0932109	75	8.01282e-05	yes	0.00537249			75	…	0.00537249					Cerd182210	0.245841	-0.00714641	-0.0192561	0.00496332
DG181_203	0.0948425	76	8.02568e-05	yes	0.00544413			76	…	0.00544413					Cerd182220	0.157547	-0.0104828	-0.0250555	0.00408988
PE200_204	0.0951706	77	8.03859e-05	yes	0.00551576			77	…	0.00551576					Cerd182230	0.655285	-0.00312002	-0.0168846	0.0106445
PCP160205	0.096265	78	8.05153e-05	yes	0.00558739			78	…	0.00558739					Cerd182240	0.522774	-0.00444715	-0.0181487	0.00925436
TG524NL182	0.0975418	79	8.06452e-05	yes	0.00565903			79	…	0.00565903					Cerd182241	0.378587	-0.006065	-0.0196208	0.00749084
TGO502NL181	0.0980082	80	8.07754e-05	yes	0.00573066			80	…	0.00573066					Cerd182260	0.848111	-0.00136212	-0.015372	0.0126478
DG181_204	0.104012	81	8.09061e-05	yes	0.00580229			81	…	0.00580229					Cerd191160	0.794992	0.00188206	-0.0123863	0.0161504
LPC191c	0.10589	82	8.10373e-05	yes	0.00587393			82	…	0.00587393					Cerd191180	0.405741	0.00593711	-0.008118	0.0199922
DG181_182	0.105997	83	8.11688e-05	yes	0.00594556			83	…	0.00594556					Cerd191200	0.651147	-0.00319369	-0.0171044	0.010717
HexCerd181220	0.106492	84	8.13008e-05	yes	0.00601719			84	…	0.00601719					Cerd191220	0.411259	0.00535749	-0.00747623	0.0181912
TG545NL204	0.108587	85	8.14332e-05	yes	0.00608883			85	…	0.00608883					Cerd191230	0.241396	0.00777299	-0.00527443	0.0208204
SM372	0.109771	86	8.15661e-05	yes	0.00616046			86	…	0.00616046					Cerd191240	0.477945	0.00465795	-0.00826489	0.0175808
PC180_204	0.110836	87	8.16993e-05	yes	0.00623209			87	…	0.00623209					Cerd191241	0.580951	0.00384984	-0.00988443	0.0175841
PEP181182b	0.111318	88	8.18331e-05	yes	0.00630372			88	…	0.00630372					Cerd191260	0.957804	0.00035169	-0.012743	0.0134464
Cerd182160	0.111837	89	8.19672e-05	yes	0.00637536			89	…	0.00637536					Cerd201220	0.899595	-0.00116352	-0.0193301	0.017003
PEP180183	0.112742	90	8.21018e-05	yes	0.00644699			90	…	0.00644699					Cerd201230	0.915097	0.00091307	-0.0159589	0.017785
SMd181200SMd161220	0.116887	91	8.22368e-05	yes	0.00651862			91	…	0.00651862					Cerd201240	0.850501	-0.00157177	-0.0179996	0.0148561
Cerd161240	0.11848	92	8.23723e-05	yes	0.00659026			92	…	0.00659026					Cerd201241	0.795983	-0.0020456	-0.0176309	0.0135397
PEP181205a	0.121429	93	8.25083e-05	yes	0.00666189			93	…	0.00666189					Cerd201260	0.913054	0.00065016	-0.0110804	0.0123807
PEO180225	0.121567	94	8.26446e-05	yes	0.00673352			94	…	0.00673352					Cerm180200	0.502246	-0.00450111	-0.0177091	0.00870692
PEP180224	0.122333	95	8.27815e-05	yes	0.00680516			95	…	0.00680516					Cerm180220	0.717331	-0.00246786	-0.0158948	0.0109591
TG525NL183	0.122786	96	8.29187e-05	yes	0.00687679			96	…	0.00687679					Cerm180230	0.673786	0.0027022	-0.00994088	0.0153453
PC355	0.126497	97	8.30565e-05	yes	0.00694842			97	…	0.00694842					Cerm180240	0.865498	-0.00111428	-0.0140739	0.0118453
AC140	0.127589	98	8.31947e-05	yes	0.00702006			98	…	0.00702006					Cerm180241	0.654491	-0.00294145	-0.0158863	0.0100034
PCP150204a	0.12882	99	8.33333e-05	yes	0.00709169			99	…	0.00709169					Cerm181180	0.723396	-0.00234592	-0.0154018	0.0107099
Cerd181180	0.130602	100	8.34725e-05	yes	0.00716332			100	…	0.00716332					Cerm181200	0.0167206	-0.0163337	-0.0296792	-0.00298829
PCP352b	0.131011	101	8.3612e-05	yes	0.00723496			101	…	0.00723496					Cerm181220	0.316181	-0.00641034	-0.0189927	0.00617198
PC382	0.132703	102	8.37521e-05	yes	0.00730659			102	…	0.00730659					Cerm181230	0.923703	0.00059902	-0.011723	0.0129211
TG522NL182	0.137087	103	8.38926e-05	yes	0.00737822			103	…	0.00737822					Cerm181240	0.563993	-0.00364273	-0.0160762	0.00879075
Cerd181210	0.139051	104	8.40336e-05	yes	0.00744986			104	…	0.00744986					Cerm181241	0.468918	-0.00457936	-0.0170272	0.00786847
DG181_183	0.139504	105	8.41751e-05	yes	0.00752149			105	…	0.00752149					DE160	0.497348	-0.00431995	-0.0168522	0.00821231
LPCP170a	0.139826	106	8.4317e-05	yes	0.00759312			106	…	0.00759312					DE181	0.526833	-0.00381555	-0.0156869	0.00805583
PI180_181	0.141603	107	8.44595e-05	yes	0.00766476			107	…	0.00766476					DE182	0.955386	0.00039539	-0.0135279	0.0143187
LPE170sn2	0.142774	108	8.46024e-05	yes	0.00773639			108	…	0.00773639					DE204	0.0650978	0.0135749	-0.00085757	0.0280074
PE180_225n6	0.143221	109	8.47458e-05	yes	0.00780802			109	…	0.00780802					DE205	0.245988	0.00985435	-0.00684925	0.026558
SMd182240	0.146152	110	8.48896e-05	yes	0.00787966			110	…	0.00787966					DE226	0.655879	0.00275788	-0.00943147	0.0149472
PS384	0.146369	111	8.5034e-05	yes	0.00795129			111	…	0.00795129					DG140_160	0.914241	0.00067996	-0.0117587	0.0131186
SMd181160	0.146734	112	8.51789e-05	yes	0.00802292			112	…	0.00802292					DG140_182	0.869123	-0.00105729	-0.0136979	0.0115833
PEP160205	0.148427	113	8.53242e-05	yes	0.00809456			113	…	0.00809456					DG160_160	0.7236	-0.00245407	-0.0161224	0.0112143
PE160_204	0.149202	114	8.54701e-05	yes	0.00816619			114	…	0.00816619					DG160_161	0.632391	-0.00294308	-0.0150598	0.00917367
DG181_205	0.153639	115	8.56164e-05	yes	0.00823782			115	…	0.00823782					DG160_181	0.319638	-0.00717798	-0.0213683	0.00701237
PI15MHDA_182PI170_182	0.15467	116	8.57633e-05	yes	0.00830946			116	…	0.00830946					DG160_182	0.677346	-0.00327661	-0.0187867	0.0122335
TG502NL161	0.15493	117	8.59107e-05	yes	0.00838109			117	…	0.00838109					DG160_204	0.379701	-0.00449161	-0.0145543	0.0055711
Cerd161160	0.15538	118	8.60585e-05	yes	0.00845272			118	…	0.00845272					DG160_225	0.641206	-0.00299389	-0.0156467	0.00965892
PEP160224	0.155722	119	8.62069e-05	yes	0.00852436			119	…	0.00852436					DG160_226	0.635325	0.00355203	-0.0111989	0.018303
TGO501NL160	0.15629	120	8.63558e-05	yes	0.00859599			120	…	0.00859599					DG161_181	0.0815904	-0.0108737	-0.0231244	0.00137707
S1Pd182	0.156638	121	8.65052e-05	yes	0.00866762			121	…	0.00866762					DG180_181	0.352262	-0.00659299	-0.0205398	0.00735383
PC180_224	0.157345	122	8.66551e-05	yes	0.00873926			122	…	0.00873926					DG180_182	0.949965	-0.00046105	-0.0149357	0.0140136
Cerd182220	0.157547	123	8.68056e-05	yes	0.00881089			123	…	0.00881089					DG180_204	0.507885	-0.00443436	-0.0176202	0.00875144
TG543NL181	0.159228	124	8.69565e-05	yes	0.00888252			124	…	0.00888252					DG181_181	0.0422382	-0.0127813	-0.0251098	-0.00045273
TG503NL161	0.160601	125	8.7108e-05	yes	0.00895415			125	…	0.00895415					DG181_182	0.105997	-0.0112791	-0.0249775	0.00241939
CE204	0.161144	126	8.726e-05	yes	0.00902579			126	…	0.00902579					DG181_183	0.139504	-0.00936481	-0.021814	0.00308437
PC181_181	0.165014	127	8.74126e-05	yes	0.00909742			127	…	0.00909742					DG181_203	0.0948425	-0.00994718	-0.0216352	0.00174083
TG545NL183	0.165126	128	8.75657e-05	yes	0.00916905			128	…	0.00916905					DG181_204	0.104012	-0.00853277	-0.0188364	0.0017709
LPE204sn2	0.165845	129	8.77193e-05	yes	0.00924069			129	…	0.00924069					DG181_205	0.153639	0.00930805	-0.00350932	0.0221254
PC181_226a	0.168988	130	8.78735e-05	yes	0.00931232			130	…	0.00931232					DG182_182	0.376902	-0.00621453	-0.0200555	0.00762645
TGO542NL171	0.17015	131	8.80282e-05	yes	0.00938395			131	…	0.00938395					DG182_204	0.346433	-0.00491661	-0.0151919	0.00535867
PI376	0.171683	132	8.81834e-05	yes	0.00945559			132	…	0.00945559					DG182_226	0.810214	0.00159162	-0.0114641	0.0146473
CE201	0.172769	133	8.83392e-05	yes	0.00952722			133	…	0.00952722					GM1d181160	0.596103	-0.00376244	-0.017742	0.0102172
TG503NL182	0.172934	134	8.84956e-05	yes	0.00959885			134	…	0.00959885					GM3d181160	0.310337	-0.00751276	-0.0220814	0.00705591
Hex3Cerd181160	0.174902	135	8.86525e-05	yes	0.00967049			135	…	0.00967049					GM3d181180	0.590009	-0.00355169	-0.0165324	0.00942897
TG544NL203	0.176309	136	8.88099e-05	yes	0.00974212			136	…	0.00974212					GM3d181200	0.0156236	-0.01384	-0.0250301	-0.00264983
PI340	0.176875	137	8.8968e-05	yes	0.00981375			137	…	0.00981375					GM3d181220	0.220246	-0.00826825	-0.0215291	0.00499264
PC330a	0.177826	138	8.91266e-05	yes	0.00988539			138	…	0.00988539					GM3d181240	0.937307	0.0004737	-0.0113909	0.0123383
PS383	0.18331	139	8.92857e-05	yes	0.00995702			139	…	0.00995702					GM3d181241	0.957438	-0.00036165	-0.0137112	0.012988
Hex2Cerd161160	0.184208	140	8.94454e-05	yes	0.0100287			140	…	0.0100287					Hex2Cerd161160	0.184208	0.0084693	-0.00406594	0.0210045
SM443	0.185526	141	8.96057e-05	yes	0.0101003			141	…	0.0101003					Hex2Cerd161241	0.873294	0.00104224	-0.0118324	0.0139169
Cerd181220	0.185969	142	8.97666e-05	yes	0.0101719			142	…	0.0101719					Hex2Cerd181160	0.719568	0.00247485	-0.0111024	0.0160521
PC182_182	0.18632	143	8.99281e-05	yes	0.0102436			143	…	0.0102436					Hex2Cerd181180	0.741409	0.00204371	-0.0101555	0.014243
PE15MHDA_226	0.187054	144	9.00901e-05	yes	0.0103152			144	…	0.0103152					Hex2Cerd181200	0.25384	-0.00852179	-0.023209	0.0061654
SMd180140	0.187156	145	9.02527e-05	yes	0.0103868			145	…	0.0103868					Hex2Cerd181220	0.464131	-0.00584501	-0.0215632	0.00987318
PI396	0.190793	146	9.04159e-05	yes	0.0104585			146	…	0.0104585					Hex2Cerd181240	0.270468	-0.00750401	-0.0208974	0.00588934
PC182_205	0.191691	147	9.05797e-05	yes	0.0105301			147	…	0.0105301					Hex2Cerd181241	0.91932	0.00069097	-0.0127477	0.0141297
AC150a	0.191839	148	9.07441e-05	yes	0.0106017			148	…	0.0106017					Hex2Cerd182160	0.523827	-0.00407973	-0.0166812	0.00852171
PE180_203a	0.195333	149	9.09091e-05	yes	0.0106734			149	…	0.0106734					Hex2Cerd182241	0.780189	-0.00193209	-0.0155698	0.0117056
CE150	0.19686	150	9.10747e-05	yes	0.010745			150	…	0.010745					Hex3Cerd181160	0.174902	-0.00970737	-0.0237696	0.00435481
PE160_205	0.201633	151	9.12409e-05	yes	0.0108166			151	…	0.0108166					Hex3Cerd181180	0.738775	-0.00225834	-0.0155978	0.0110811
LPCO201	0.20255	152	9.14077e-05	yes	0.0108883			152	…	0.0108883					Hex3Cerd181200	0.585712	-0.00345716	-0.0159476	0.00903331
PEP181226b	0.20261	153	9.15751e-05	yes	0.0109599			153	…	0.0109599					Hex3Cerd181220	0.311576	-0.00720131	-0.0212019	0.0067993
PC180_182	0.202731	154	9.17431e-05	yes	0.0110315			154	…	0.0110315					Hex3Cerd181240	0.7152	0.00254918	-0.0112117	0.0163101
LPC191a	0.203507	155	9.19118e-05	yes	0.0111032			155	…	0.0111032					Hex3Cerd181241	0.762723	-0.00215197	-0.0161926	0.0118886
PE180_224	0.206576	156	9.2081e-05	yes	0.0111748			156	…	0.0111748					HexCerd161180	0.500079	-0.00430585	-0.016877	0.00826531
PC160_181	0.206718	157	9.22509e-05	yes	0.0112464			157	…	0.0112464					HexCerd161200	0.914555	-0.00063652	-0.0123235	0.0110504
HexCerd181200	0.206918	158	9.24214e-05	yes	0.0113181			158	…	0.0113181					HexCerd161220	0.739512	-0.00223118	-0.0154488	0.0109865
LPC205sn1	0.207306	159	9.25926e-05	yes	0.0113897			159	…	0.0113897					HexCerd161240	0.964728	0.00028479	-0.0124022	0.0129718
CE202	0.209615	160	9.27644e-05	yes	0.0114613			160	…	0.0114613					HexCerd181160	0.679979	-0.00286531	-0.0165468	0.0108162
AC180	0.210267	161	9.29368e-05	yes	0.011533			161	…	0.011533					HexCerd181180	0.767783	-0.00192521	-0.0147684	0.010918
PI160160	0.211611	162	9.31099e-05	yes	0.0116046			162	…	0.0116046					HexCerd181200	0.206918	-0.0085941	-0.0219807	0.00479254
TGO501NL150	0.219578	163	9.32836e-05	yes	0.0116762			163	…	0.0116762					HexCerd181220	0.106492	-0.0113805	-0.0252219	0.00246087
GM3d181220	0.220246	164	9.34579e-05	yes	0.0117479			164	…	0.0117479					HexCerd181240	0.36602	-0.00584776	-0.0185783	0.00688274
CE203	0.22061	165	9.3633e-05	yes	0.0118195			165	…	0.0118195					HexCerd181241	0.655861	-0.00308851	-0.0167384	0.0105614
PC160_203a	0.221163	166	9.38086e-05	yes	0.0118911			166	…	0.0118911					HexCerd182180	0.550191	-0.00455961	-0.0195868	0.0104676
AC130	0.221327	167	9.3985e-05	yes	0.0119628			167	…	0.0119628					HexCerd182200	0.266689	-0.0080996	-0.0224419	0.00624273
PI180_225n3	0.222443	168	9.4162e-05	yes	0.0120344			168	…	0.0120344					HexCerd182220	0.0548319	-0.0127897	-0.0258469	0.00026751
LPI180sn2	0.226193	169	9.43396e-05	yes	0.012106			169	…	0.012106					HexCerd182240	0.0698224	-0.0108828	-0.022656	0.0008905
LPE170sn1	0.226444	170	9.4518e-05	yes	0.0121777			170	…	0.0121777					LPC140sn1	0.475204	0.00444766	-0.00781517	0.0167105
TG523NL161	0.226523	171	9.4697e-05	yes	0.0122493			171	…	0.0122493					LPC140sn2	0.464677	0.00466707	-0.00789884	0.017233
Cerd182140	0.228301	172	9.48767e-05	yes	0.0123209			172	…	0.0123209					LPC150sn1	0.479429	0.00494011	-0.00881192	0.0186921
LPC15MHDAsn2	0.229243	173	9.5057e-05	yes	0.0123926			173	…	0.0123926					LPC150sn2	0.287074	0.00740529	-0.00627798	0.0210886
LPC191b	0.230125	174	9.52381e-05	yes	0.0124642			174	…	0.0124642					LPC15MHDAsn1104_sn1	0.318959	0.00691626	-0.00673747	0.02057
PE170_204	0.231711	175	9.54198e-05	yes	0.0125358			175	…	0.0125358					LPC15MHDAsn1LPC170	0.376587	0.00638111	-0.00782146	0.0205837
LPC171sn2a	0.236776	176	9.56023e-05	yes	0.0126074			176	…	0.0126074					LPC15MHDAsn2	0.229243	0.00861347	-0.00547292	0.0226999
TGO522NL171	0.237798	177	9.57854e-05	yes	0.0126791			177	…	0.0126791					LPC160sn1	0.680801	0.00319602	-0.0121062	0.0184982
PC161_204	0.240076	178	9.59693e-05	yes	0.0127507			178	…	0.0127507					LPC160sn2	0.558323	0.00443298	-0.0104802	0.0193461
Cerd191230	0.241396	179	9.61538e-05	yes	0.0128223			179	…	0.0128223					LPC161sn1	0.917793	-0.00069815	-0.0140234	0.0126271
CE221	0.242612	180	9.63391e-05	yes	0.012894			180	…	0.012894					LPC161sn2	0.795799	-0.00164086	-0.014131	0.0108492
Cerd182210	0.245841	181	9.65251e-05	yes	0.0129656			181	…	0.0129656					LPC170sn1	0.554121	0.00437969	-0.0101981	0.0189574
DE205	0.245988	182	9.67118e-05	yes	0.0130372			182	…	0.0130372					LPC171asn1104_sn1	0.351807	0.00626078	-0.00697076	0.0194923
PCP180182	0.246972	183	9.68992e-05	yes	0.0131089			183	…	0.0131089					LPC171sn1aLPC171	0.39513	0.00581211	-0.00764007	0.0192643
PC180_181	0.251553	184	9.70874e-05	yes	0.0131805			184	…	0.0131805					LPC171sn1b	0.011882	0.0146646	0.00327737	0.0260518
PEP181225b	0.251706	185	9.72763e-05	yes	0.0132521			185	…	0.0132521					LPC171sn2a	0.236776	0.0078268	-0.00518188	0.0208355
Cerd181240	0.252135	186	9.74659e-05	yes	0.0133238			186	…	0.0133238					LPC180sn1	0.977773	-0.00022139	-0.0158752	0.0154324
PC366a	0.253322	187	9.76563e-05	yes	0.0133954			187	…	0.0133954					LPC180sn2	0.864866	-0.00138247	-0.0173853	0.0146204
Hex2Cerd181200	0.25384	188	9.78474e-05	yes	0.013467			188	…	0.013467					LPC181sn1	0.936519	0.00056999	-0.0135285	0.0146684
PEO365	0.254789	189	9.80392e-05	yes	0.0135387			189	…	0.0135387					LPC181sn2	0.776624	0.00201335	-0.011965	0.0159917
PC180_225n3PC201_204	0.256088	190	9.82318e-05	yes	0.0136103			190	…	0.0136103					LPC182sn1	0.274494	0.00844508	-0.00675544	0.0236456
TGO503NL182	0.259459	191	9.84252e-05	yes	0.0136819			191	…	0.0136819					LPC182sn2	0.53678	0.00482	-0.010545	0.020185
SM383b	0.260023	192	9.86193e-05	yes	0.0137536			192	…	0.0137536					LPC183asn1104_sn1	0.410768	0.00487663	-0.00679265	0.0165459
LPCP181	0.260089	193	9.88142e-05	yes	0.0138252			193	…	0.0138252					LPC183sn1aLPC183s	0.767467	0.00190789	-0.010802	0.0146178
PCP160160	0.260604	194	9.90099e-05	yes	0.0138968			194	…	0.0138968					LPC183sn1b	0.955902	0.00036476	-0.0126306	0.0133601
PEP160203b	0.262971	195	9.92063e-05	yes	0.0139685			195	…	0.0139685					LPC183sn2a	0.594909	0.00304794	-0.00824019	0.0143361
Sphd182	0.264043	196	9.94036e-05	yes	0.0140401			196	…	0.0140401					LPC190asn1104_sn1	0.088037	0.0117417	-0.00176605	0.0252494
PCO365	0.266032	197	9.96016e-05	yes	0.0141117			197	…	0.0141117					LPC190sn1aLPC190	0.469713	0.00544075	-0.00937508	0.0202566
HexCerd182200	0.266689	198	9.98004e-05	yes	0.0141834			198	…	0.0141834					LPC190sn1b	0.756107	0.00231446	-0.0123637	0.0169926
LPC205sn2	0.267108	199	0.0001	yes	0.014255			199	…	0.014255					LPC190sn2a	0.332771	0.00645635	-0.00665982	0.0195725
LPE182sn1	0.267718	200	0.0001002	yes	0.0143266			200	…	0.0143266					LPC191a	0.203507	0.00783105	-0.00427514	0.0199372
TG502NL181	0.269132	201	0.000100402	yes	0.0143983			201	…	0.0143983					LPC191b	0.230125	0.00782468	-0.00499628	0.0206456
Hex2Cerd181240	0.270468	202	0.000100604	yes	0.0144699			202	…	0.0144699					LPC191c	0.10589	0.0103408	-0.00221449	0.0228962
PC4010	0.27291	203	0.000100806	yes	0.0145415			203	…	0.0145415					LPC200sn1	0.483263	-0.00441128	-0.0167995	0.00797692
SM383a	0.274127	204	0.00010101	yes	0.0146132			204	…	0.0146132					LPC200sn2	0.714355	-0.0023415	-0.0149426	0.0102596
LPC182sn1	0.274494	205	0.000101215	yes	0.0146848			205	…	0.0146848					LPC201sn1	0.424574	-0.00571835	-0.0198143	0.00837764
LPI204sn1	0.275341	206	0.00010142	yes	0.0147564			206	…	0.0147564					LPC201sn2	0.935972	0.00054866	-0.0129066	0.0140039
PC384b	0.277187	207	0.000101626	yes	0.0148281			207	…	0.0148281					LPC202sn1	0.95096	-0.00045676	-0.0150879	0.0141744
PI386	0.277344	208	0.000101833	yes	0.0148997			208	…	0.0148997					LPC202sn2	0.858454	-0.00129572	-0.0156081	0.0130166
PI341	0.278409	209	0.000102041	yes	0.0149713			209	…	0.0149713					LPC203sn1	0.654115	-0.00297601	-0.0160577	0.0101057
PG341	0.2792	210	0.000102249	yes	0.015043			210	…	0.015043					LPC203sn2	0.348886	-0.00603481	-0.0187115	0.00664189
Cerd161230	0.281357	211	0.000102459	yes	0.0151146			211	…	0.0151146					LPC204sn1	0.733366	-0.00261922	-0.0177642	0.0125258
Sulfatided181240OH	0.282531	212	0.000102669	yes	0.0151862			212	…	0.0151862					LPC204sn2	0.452403	-0.0059116	-0.0213988	0.00957562
CE224	0.286143	213	0.000102881	yes	0.0152579			213	…	0.0152579					LPC205sn1	0.207306	0.00984552	-0.0055033	0.0251943
LPC150sn2	0.287074	214	0.000103093	yes	0.0153295			214	…	0.0153295					LPC205sn2	0.267108	0.00905371	-0.0069922	0.0250996
LPE204sn1	0.28919	215	0.000103306	yes	0.0154011			215	…	0.0154011					LPC220sn1	0.995513	3.446e-05	-0.0120364	0.0121053
PC161_182	0.291117	216	0.00010352	yes	0.0154728			216	…	0.0154728					LPC220sn2	0.763008	-0.00182075	-0.0137153	0.0100738
PI160_203b	0.292169	217	0.000103734	yes	0.0155444			217	…	0.0155444					LPC221sn1	0.816647	0.00146499	-0.010982	0.013912
TG542NL201	0.29276	218	0.00010395	yes	0.015616			218	…	0.015616					LPC221sn2	0.8429	0.00132559	-0.011851	0.0145021
TG568NL205	0.292809	219	0.000104167	yes	0.0156877			219	…	0.0156877					LPC224sn1	0.672031	-0.00275228	-0.0155565	0.0100519
PC150_226	0.293635	220	0.000104384	yes	0.0157593			220	…	0.0157593					LPC224sn2	0.557873	-0.00371194	-0.0161851	0.00876123
PCO407b	0.294368	221	0.000104603	yes	0.0158309			221	…	0.0158309					LPC225n3sn1104_sn1	0.963808	0.00030956	-0.0131304	0.0137495
PE180_225n3	0.295231	222	0.000104822	yes	0.0159026			222	…	0.0159026					LPC225sn1n3LPC225	0.797411	-0.00175014	-0.0151804	0.0116801
PC160_203b	0.295307	223	0.000105042	yes	0.0159742			223	…	0.0159742					LPC225sn1n6	0.467575	-0.00451269	-0.0167422	0.00771687
PCP180226	0.295463	224	0.000105263	yes	0.0160458			224	…	0.0160458					LPC225sn2n3	0.806274	0.0016718	-0.0117571	0.0151007
PCP150204b	0.295999	225	0.000105485	yes	0.0161175			225	…	0.0161175					LPC226sn1	0.870759	0.00114325	-0.0126996	0.0149861
TG532NL181	0.299376	226	0.000105708	yes	0.0161891			226	…	0.0161891					LPC226sn2	0.721416	0.00258358	-0.0116884	0.0168555
Cerd161241	0.300606	227	0.000105932	yes	0.0162607			227	…	0.0162607					LPC240sn1	0.481393	-0.00459776	-0.0174542	0.00825872
PC310b	0.302883	228	0.000106157	yes	0.0163324			228	…	0.0163324					LPC240sn2	0.611505	-0.00343114	-0.0167346	0.00987228
PEO385b	0.303199	229	0.000106383	yes	0.016404			229	…	0.016404					LPC260sn1	0.989575	7.424e-05	-0.0111197	0.0112682
PI160_204	0.304282	230	0.00010661	yes	0.0164756			230	…	0.0164756					LPC260sn2	0.840335	0.00135948	-0.0119336	0.0146526
GM3d181160	0.310337	231	0.000106838	yes	0.0165473			231	…	0.0165473					LPCO160	0.910946	0.0008396	-0.0139488	0.015628
Hex3Cerd181220	0.311576	232	0.000107066	yes	0.0166189			232	…	0.0166189					LPCO180	0.79375	0.00181457	-0.0118574	0.0154865
PEP201226	0.314433	233	0.000107296	yes	0.0166905			233	…	0.0166905					LPCO181	0.591991	-0.0038943	-0.0182034	0.0104148
Cerm181220	0.316181	234	0.000107527	yes	0.0167622			234	…	0.0167622					LPCO200	0.793302	0.00166601	-0.0108588	0.0141908
LPC15MHDAsn1104_sn1	0.318959	235	0.000107759	yes	0.0168338			235	…	0.0168338					LPCO201	0.20255	0.00868915	-0.00471483	0.0220931
PCP160183	0.319182	236	0.000107991	yes	0.0169054			236	…	0.0169054					LPCO220	0.75097	-0.00205546	-0.0148132	0.0107022
DG160_181	0.319638	237	0.000108225	yes	0.0169771			237	…	0.0169771					LPCO221	0.341347	0.00606124	-0.00647306	0.0185955
PC140_160	0.322418	238	0.00010846	yes	0.0170487			238	…	0.0170487					LPCO240	0.95736	-0.00032724	-0.0123845	0.01173
SMd182230	0.323086	239	0.000108696	yes	0.0171203			239	…	0.0171203					LPCO241	0.650045	0.0028902	-0.00965611	0.0154365
SMd181230SMd171240	0.324114	240	0.000108932	yes	0.017192			240	…	0.017192					LPCO242	0.759195	0.00218764	-0.01187	0.0162453
COH	0.330762	241	0.00010917	yes	0.0172636			241	…	0.0172636					LPCP160	0.942771	0.00052471	-0.0138747	0.0149241
LPC190sn2a	0.332771	242	0.000109409	yes	0.0173352			242	…	0.0173352					LPCP170a	0.139826	0.00909361	-0.00300507	0.0211923
PCO360	0.332821	243	0.000109649	yes	0.0174069			243	…	0.0174069					LPCP170b	0.0760742	0.0110633	-0.00117162	0.0232983
CE181	0.333756	244	0.00010989	yes	0.0174785			244	…	0.0174785					LPCP180	0.337417	0.00683474	-0.0071843	0.0208538
PEP200226	0.333838	245	0.000110132	yes	0.0175501			245	…	0.0175501					LPCP181	0.260089	0.00703552	-0.00525123	0.0193223
AC142	0.334684	246	0.000110375	yes	0.0176218			246	…	0.0176218					LPCP200	0.615593	0.00347301	-0.0101489	0.017095
PEO341	0.334825	247	0.000110619	yes	0.0176934			247	…	0.0176934					LPE160sn1	0.719898	0.0024912	-0.0111926	0.016175
PI160_161	0.336104	248	0.000110865	yes	0.017765			248	…	0.017765					LPE160sn2	0.748921	0.00239581	-0.0123488	0.0171404
LPCP180	0.337417	249	0.000111111	yes	0.0178367			249	…	0.0178367					LPE170sn1	0.226444	-0.00860271	-0.0225867	0.00538131
LPCO221	0.341347	250	0.000111359	yes	0.0179083			250	…	0.0179083					LPE170sn2	0.142774	-0.011093	-0.025962	0.00377603
PEO160226	0.345201	251	0.000111607	yes	0.0179799			251	…	0.0179799					LPE180sn1	0.606975	-0.00381977	-0.0184436	0.0108041
PC180_225n6	0.345552	252	0.000111857	yes	0.0180516			252	…	0.0180516					LPE180sn2	0.682583	-0.00306682	-0.0178377	0.0117041
DG182_204	0.346433	253	0.000112108	yes	0.0181232			253	…	0.0181232					LPE181sn1	0.542624	0.00428737	-0.00957832	0.0181531
PC395a	0.348205	254	0.00011236	yes	0.0181948			254	…	0.0181948					LPE181sn2	0.644742	0.00335403	-0.0109726	0.0176807
LPC203sn2	0.348886	255	0.000112613	yes	0.0182665			255	…	0.0182665					LPE182sn1	0.267718	0.00802007	-0.00621213	0.0222523
PCP385b	0.349855	256	0.000112867	yes	0.0183381			256	…	0.0183381					LPE182sn2	0.455195	0.00552796	-0.00904417	0.0201001
TG504NL183	0.350212	257	0.000113122	yes	0.0184097			257	…	0.0184097					LPE204sn1	0.28919	-0.00677694	-0.0193547	0.00580077
LPC171asn1104_sn1	0.351807	258	0.000113379	yes	0.0184814			258	…	0.0184814					LPE204sn2	0.165845	-0.00988909	-0.0239126	0.00413442
DG180_181	0.352262	259	0.000113636	yes	0.018553			259	…	0.018553					LPE226sn1	0.875988	-0.00103975	-0.014165	0.0120855
PEP201204	0.355847	260	0.000113895	yes	0.0186246			260	…	0.0186246					LPE226sn2	0.784235	-0.00185377	-0.0151905	0.0114829
PE360	0.359428	261	0.000114155	yes	0.0186963			261	…	0.0186963					LPEP160	0.532768	-0.00510162	-0.0212052	0.0110019
PC280	0.363486	262	0.000114416	yes	0.0187679			262	…	0.0187679					LPEP180	0.756381	-0.00250732	-0.0184271	0.0134124
PS361	0.363938	263	0.000114679	yes	0.0188395			263	…	0.0188395					LPEP181	0.993977	5.474e-05	-0.0142321	0.0143415
CE220	0.365157	264	0.000114943	yes	0.0189112			264	…	0.0189112					LPEP200	0.793122	0.00183735	-0.0119633	0.015638
HexCerd181240	0.36602	265	0.000115207	yes	0.0189828			265	…	0.0189828					LPI180sn1	0.0728323	-0.0111375	-0.0233163	0.0010413
SM442	0.366534	266	0.000115473	yes	0.0190544			266	…	0.0190544					LPI180sn2	0.226193	-0.00776675	-0.0203851	0.00485156
Ubiquinone	0.3671	267	0.000115741	yes	0.0191261			267	…	0.0191261					LPI181sn1	0.498682	0.00498083	-0.00951364	0.0194753
PEP170204a	0.367747	268	0.000116009	yes	0.0191977			268	…	0.0191977					LPI181sn2	0.961078	0.00035665	-0.0140412	0.0147545
TG512NL150	0.368124	269	0.000116279	yes	0.0192693			269	…	0.0192693					LPI182sn1	0.542316	-0.00600027	-0.0253908	0.0133902
PEP180203b	0.368623	270	0.00011655	yes	0.019341			270	…	0.019341					LPI182sn2	0.57181	-0.00359747	-0.0161272	0.00893225
Sulfatided181241OH	0.369852	271	0.000116822	yes	0.0194126			271	…	0.0194126					LPI204sn1	0.275341	-0.00974931	-0.0273284	0.00782982
PCO341	0.372842	272	0.000117096	yes	0.0194842			272	…	0.0194842					LPI204sn2	0.0685643	-0.0136415	-0.028332	0.00104905
CE182	0.376004	273	0.000117371	yes	0.0195559			273	…	0.0195559					PC140_160	0.322418	0.00640337	-0.00632875	0.0191355
TGO543NL171	0.376102	274	0.000117647	yes	0.0196275			274	…	0.0196275					PC140_204	0.897901	-0.00084577	-0.0138309	0.0121394
LPC15MHDAsn1LPC170	0.376587	275	0.000117925	yes	0.0196991			275	…	0.0196991					PC140_226	0.403517	0.00545773	-0.0074014	0.0183169
DG182_182	0.376902	276	0.000118203	yes	0.0197708			276	…	0.0197708					PC150_203	0.677262	-0.00270528	-0.0155074	0.0100968
Cerd182241	0.378587	277	0.000118483	yes	0.0198424			277	…	0.0198424					PC150_204	0.921667	0.00069206	-0.0131726	0.0145567
SMd182170	0.379242	278	0.000118765	yes	0.019914			278	…	0.019914					PC150_226	0.293635	0.00726674	-0.00634495	0.0208784
DG160_204	0.379701	279	0.000119048	yes	0.0199857			279	…	0.0199857					PC15MHDA_181	0.852419	0.00120197	-0.011526	0.0139299
CE225n3	0.3798	280	0.000119332	yes	0.0200573			280	…	0.0200573					PC15MHDA_182	0.871259	-0.0010797	-0.0142044	0.012045
PC345	0.38344	281	0.000119617	yes	0.0201289			281	…	0.0201289					PC15MHDA_204	0.917402	-0.00072624	-0.0145218	0.0130694
SM371	0.384561	282	0.000119904	yes	0.0202006			282	…	0.0202006					PC15MHDA_226	0.38832	0.00626209	-0.00802421	0.0205484
SMd171140	0.384797	283	0.000120192	yes	0.0202722			283	…	0.0202722					PC160_160	0.530591	-0.00436214	-0.0180586	0.00933431
PCP352a	0.384895	284	0.000120482	yes	0.0203438			284	…	0.0203438					PC160_180	0.951482	-0.00050316	-0.0167941	0.0157877
PC332	0.386457	285	0.000120773	yes	0.0204155			285	…	0.0204155					PC160_181	0.206718	-0.00892552	-0.022822	0.00497097
PC15MHDA_226	0.38832	286	0.000121065	yes	0.0204871			286	…	0.0204871					PC160_182	0.437411	-0.00698801	-0.0247012	0.0107252
SM403a	0.388758	287	0.000121359	yes	0.0205587			287	…	0.0205587					PC160_183a	0.61593	-0.00278256	-0.0137069	0.00814174
PI385a	0.390413	288	0.000121655	yes	0.0206304			288	…	0.0206304					PC160_183b	0.0657579	-0.011509	-0.0237754	0.00075736
LPC171sn1aLPC171	0.39513	289	0.000121951	yes	0.020702			289	…	0.020702					PC160_203a	0.221163	-0.00813933	-0.0212195	0.00494086
PCO160226	0.397204	290	0.000122249	yes	0.0207736			290	…	0.0207736					PC160_203b	0.295307	-0.00660057	-0.0190074	0.00580631
TG546NL205	0.400387	291	0.000122549	yes	0.0208453			291	…	0.0208453					PC160_204	0.0863547	-0.014423	-0.0309265	0.00208048
PI180_204	0.400572	292	0.00012285	yes	0.0209169			292	…	0.0209169					PC160_205	0.420796	0.00666923	-0.00963715	0.0229756
TG482NL182	0.401292	293	0.000123153	yes	0.0209885			293	…	0.0209885					PC160_226	0.891884	-0.0009537	-0.0147763	0.0128689
TG502NL140	0.401359	294	0.000123457	yes	0.0210602			294	…	0.0210602					PC161_182	0.291117	-0.0070342	-0.0201416	0.00607315
PEP181204b	0.402034	295	0.000123762	yes	0.0211318			295	…	0.0211318					PC161_204	0.240076	-0.00745078	-0.0199221	0.0050206
Cerd181170	0.402978	296	0.000124069	yes	0.0212034			296	…	0.0212034					PC161_226	0.838253	0.00137379	-0.0118839	0.0146315
PC140_226	0.403517	297	0.000124378	yes	0.0212751			297	…	0.0212751					PC170_181	0.994223	4.942e-05	-0.013396	0.0134949
Cerd191180	0.405741	298	0.000124688	yes	0.0213467			298	…	0.0213467					PC170_182	0.778187	0.00203513	-0.0121967	0.016267
TG541NL181	0.406242	299	0.000125	yes	0.0214183			299	…	0.0214183					PC170_204	0.477532	-0.00505557	-0.0190684	0.00895725
CE241	0.407221	300	0.000125313	yes	0.02149			300	…	0.02149					PC170_226	0.479565	0.0050814	-0.00906833	0.0192311
CE200	0.410004	301	0.000125628	yes	0.0215616			301	…	0.0215616					PC171_182	0.881328	-0.00099763	-0.0141623	0.0121671
LPC183asn1104_sn1	0.410768	302	0.000125945	yes	0.0216332			302	…	0.0216332					PC180_181	0.251553	-0.00782501	-0.0212463	0.00559623
Cerd191220	0.411259	303	0.000126263	yes	0.0217049			303	…	0.0217049					PC180_182	0.202731	-0.0106923	-0.027193	0.00580837
PC160_205	0.420796	304	0.000126582	yes	0.0217765			304	…	0.0217765					PC180_203	0.0575809	-0.0123685	-0.0251389	0.00040193
PCO180226	0.423415	305	0.000126904	yes	0.0218481			305	…	0.0218481					PC180_204	0.110836	-0.012048	-0.0268838	0.0027877
LPC201sn1	0.424574	306	0.000127226	yes	0.0219198			306	…	0.0219198					PC180_224	0.157345	-0.008975	-0.0214455	0.00349551
PCO322	0.42676	307	0.000127551	yes	0.0219914			307	…	0.0219914					PC180_225n3PC201_204	0.256088	-0.00854733	-0.0233487	0.006254
PC330b	0.427094	308	0.000127877	yes	0.022063			308	…	0.022063					PC180_225n6	0.345552	-0.00560314	-0.0172918	0.00608551
PEO180226	0.429812	309	0.000128205	yes	0.0221347			309	…	0.0221347					PC180_226	0.503457	-0.00457688	-0.0180454	0.00889167
TG546NL183	0.430856	310	0.000128535	yes	0.0222063			310	…	0.0222063					PC181_181	0.165014	-0.0088189	-0.0213001	0.00366233
PC160_182	0.437411	311	0.000128866	yes	0.0222779			311	…	0.0222779					PC181_182	0.612202	-0.00358406	-0.0175076	0.0103395
Cerd182170	0.438004	312	0.000129199	yes	0.0223496			312	…	0.0223496					PC181_203	0.0252701	-0.0145666	-0.027308	-0.00182524
PEO160182	0.43854	313	0.000129534	yes	0.0224212			313	…	0.0224212					PC181_226a	0.168988	-0.00901584	-0.0218965	0.00386477
S1Pd181	0.443	314	0.00012987	yes	0.0224928			314	…	0.0224928					PC181_226b	0.626276	0.00339912	-0.0103476	0.0171458
TGO501NL181	0.443192	315	0.000130208	yes	0.0225645			315	…	0.0225645					PC182_182	0.18632	0.0101088	-0.00492544	0.025143
PCP170204b	0.443367	316	0.000130548	yes	0.0226361			316	…	0.0226361					PC182_205	0.191691	0.0105377	-0.0053268	0.0264022
PE160_183b	0.444631	317	0.00013089	yes	0.0227077			317	…	0.0227077					PC200_204	0.0134251	-0.0174924	-0.0313179	-0.00366699
PEP180225n6	0.446362	318	0.000131234	yes	0.0227794			318	…	0.0227794					PC280	0.363486	0.00612648	-0.00714034	0.0193933
Sulfatided181180OH	0.449	319	0.000131579	yes	0.022851			319	…	0.022851					PC310a	0.06507	0.0113629	-0.00071657	0.0234424
PE160_181	0.449673	320	0.000131926	yes	0.0229226			320	…	0.0229226					PC310b	0.302883	0.00720451	-0.00655216	0.0209612
PEO181226	0.45143	321	0.000132275	yes	0.0229943			321	…	0.0229943					PC321	0.817942	-0.00136635	-0.013059	0.0103263
LPC204sn2	0.452403	322	0.000132626	yes	0.0230659			322	…	0.0230659					PC322	0.758569	0.00189175	-0.010232	0.0140155
SM343	0.452576	323	0.000132979	yes	0.0231375			323	…	0.0231375					PC330a	0.177826	0.00886712	-0.00406543	0.0217997
Cerd181241	0.452765	324	0.000133333	yes	0.0232092			324	…	0.0232092					PC330b	0.427094	0.0057301	-0.00847213	0.0199323
LPE182sn2	0.455195	325	0.00013369	yes	0.0232808			325	…	0.0232808					PC331	0.834993	0.00135411	-0.0114518	0.01416
TG503NL141	0.455575	326	0.000134048	yes	0.0233524			326	…	0.0233524					PC332	0.386457	0.00592018	-0.0075331	0.0193735
TG512NL170	0.455824	327	0.000134409	yes	0.0234241			327	…	0.0234241					PC345	0.38344	0.00643925	-0.00810079	0.0209793
TG512NL171	0.455824	328	0.000134771	yes	0.0234957			328	…	0.0234957					PC355	0.126497	0.0115832	-0.00330389	0.0264704
PCO385	0.456044	329	0.000135135	yes	0.0235673			329	…	0.0235673					PC360	0.643837	-0.00377326	-0.0198466	0.0123001
TG567NL204	0.459736	330	0.000135501	yes	0.023639			330	…	0.023639					PC366a	0.253322	0.00842461	-0.00607922	0.0229284
SMd180160	0.462181	331	0.00013587	yes	0.0237106			331	…	0.0237106					PC382	0.132703	-0.010303	-0.023762	0.00315614
Hex2Cerd181220	0.464131	332	0.00013624	yes	0.0237822			332	…	0.0237822					PC384b	0.277187	-0.00734422	-0.0206378	0.00594939
LPC140sn2	0.464677	333	0.000136612	yes	0.0238539			333	…	0.0238539					PC385a	0.0864359	-0.0140887	-0.0302139	0.00203645
Sphd161	0.466035	334	0.000136986	yes	0.0239255			334	…	0.0239255					PC385b	0.852253	0.00145434	-0.0139285	0.0168372
LPC225sn1n6	0.467575	335	0.000137363	yes	0.0239971			335	…	0.0239971					PC386a	0.877202	0.00116594	-0.013699	0.0160309
Cer1Pd181160	0.46787	336	0.000137741	yes	0.0240688			336	…	0.0240688					PC387c	0.636853	-0.00320234	-0.0165614	0.0101567
Cerm181241	0.468918	337	0.000138122	yes	0.0241404			337	…	0.0241404					PC395a	0.348205	0.00599848	-0.00658406	0.018581
LPC190sn1aLPC190	0.469713	338	0.000138504	yes	0.024212			338	…	0.024212					PC395b	0.913228	-0.00079094	-0.0150903	0.0135084
SMd161190	0.472314	339	0.000138889	yes	0.0242837			339	…	0.0242837					PC4010	0.27291	0.00766705	-0.00608742	0.0214215
TGO543NL181	0.472846	340	0.000139276	yes	0.0243553			340	…	0.0243553					PC407a	0.501678	-0.00466909	-0.0183518	0.00901364
TG543NL182	0.473553	341	0.000139665	yes	0.0244269			341	…	0.0244269					PC408	0.890108	0.00096195	-0.0127536	0.0146775
LPC140sn1	0.475204	342	0.000140056	yes	0.0244986			342	…	0.0244986					PC4412	0.774262	0.00194629	-0.0114212	0.0153138
PC170_204	0.477532	343	0.000140449	yes	0.0245702			343	…	0.0245702					PCO160160	0.681028	-0.0031466	-0.0182236	0.0119304
Cerd191240	0.477945	344	0.000140845	yes	0.0246418			344	…	0.0246418					PCO160203	0.885597	0.00099443	-0.0126214	0.0146102
TG481NL181	0.478794	345	0.000141243	yes	0.0247135			345	…	0.0247135					PCO160204	0.621578	-0.00355226	-0.0177249	0.0106204
LPC150sn1	0.479429	346	0.000141643	yes	0.0247851			346	…	0.0247851					PCO160226	0.397204	0.00606568	-0.00803528	0.0201666
PC170_226	0.479565	347	0.000142045	yes	0.0248567			347	…	0.0248567					PCO180181	0.767236	0.00201043	-0.0113689	0.0153898
LPC240sn1	0.481393	348	0.00014245	yes	0.0249284			348	…	0.0249284					PCO180182	0.739976	0.00213042	-0.0105137	0.0147746
LPC200sn1	0.483263	349	0.000142857	yes	0.025			349	…	0.025					PCO180204	0.712537	-0.00254108	-0.0161254	0.0110432
TG588NL226	0.484194	350	0.000143266	yes	0.0250716			350	…	0.0250716					PCO180226	0.423415	0.00547518	-0.00798762	0.018938
TG540NL180	0.48666	351	0.000143678	yes	0.0251433			351	…	0.0251433					PCO181181	0.798423	-0.00183049	-0.0159495	0.0122885
TG483NL183	0.491094	352	0.000144092	yes	0.0252149			352	…	0.0252149					PCO181182	0.731598	-0.00226105	-0.0152454	0.0107233
PEP181181b	0.491386	353	0.000144509	yes	0.0252865			353	…	0.0252865					PCO321	0.783832	-0.00204628	-0.0167398	0.0126473
Sulfatided181160	0.491663	354	0.000144928	yes	0.0253582			354	…	0.0253582					PCO322	0.42676	0.00558903	-0.00825355	0.0194316
DE160	0.497348	355	0.000145349	yes	0.0254298			355	…	0.0254298					PCO341	0.372842	-0.00677974	-0.0217515	0.00819198
LPI181sn1	0.498682	356	0.000145773	yes	0.0255014			356	…	0.0255014					PCO342	0.547156	0.00375858	-0.00853485	0.016052
PS405	0.499391	357	0.000146199	yes	0.0255731			357	…	0.0255731					PCO344	0.99013	8.606e-05	-0.013619	0.0137912
HexCerd161180	0.500079	358	0.000146628	yes	0.0256447			358	…	0.0256447					PCO354	0.594642	0.00374267	-0.0101084	0.0175937
PC407a	0.501678	359	0.000147059	yes	0.0257163			359	…	0.0257163					PCO360	0.332821	-0.00859153	-0.0260472	0.0088641
Cerm180200	0.502246	360	0.000147493	yes	0.025788			360	…	0.025788					PCO365	0.266032	0.00869526	-0.00668062	0.0240711
PEP181226a	0.502698	361	0.000147929	yes	0.0258596			361	…	0.0258596					PCO385	0.456044	-0.00559506	-0.0203719	0.00918182
PC180_226	0.503457	362	0.000148368	yes	0.0259312			362	…	0.0259312					PCO405	0.543155	0.00407936	-0.00913099	0.0172897
PEP180226	0.507302	363	0.00014881	yes	0.0260029			363	…	0.0260029					PCO407a	0.957142	0.00037483	-0.0133656	0.0141153
DG180_204	0.507885	364	0.000149254	yes	0.0260745			364	…	0.0260745					PCO407b	0.294368	-0.0077512	-0.0222925	0.00679009
TG567NL226	0.512118	365	0.000149701	yes	0.0261461			365	…	0.0261461					PCP150204a	0.12882	0.00954705	-0.00279879	0.0218929
TG502NL182	0.513385	366	0.00015015	yes	0.0262178			366	…	0.0262178					PCP150204b	0.295999	0.0068967	-0.00608546	0.0198789
CE245	0.513555	367	0.000150602	yes	0.0262894			367	…	0.0262894					PCP160140	0.899153	0.00087419	-0.0127147	0.0144631
AC120	0.515733	368	0.000151057	yes	0.026361			368	…	0.026361					PCP160160	0.260604	-0.00806071	-0.0221529	0.00603143
TG525NL204	0.517417	369	0.000151515	yes	0.0264327			369	…	0.0264327					PCP160161	0.53822	-0.00418539	-0.0175747	0.00920393
Cerd181160	0.517753	370	0.000151976	yes	0.0265043			370	…	0.0265043					PCP160181	0.807613	-0.00163426	-0.0148548	0.0115863
dhCerd180180	0.518711	371	0.000152439	yes	0.0265759			371	…	0.0265759					PCP160182	0.914107	0.00074033	-0.0127815	0.0142622
TG504NL140	0.518776	372	0.000152905	yes	0.0266476			372	…	0.0266476					PCP160183	0.319182	0.00615199	-0.00599856	0.0183025
CE170	0.518832	373	0.000153374	yes	0.0267192			373	…	0.0267192					PCP160204	0.780946	-0.00199733	-0.0161456	0.0121509
Cerd182240	0.522774	374	0.000153846	yes	0.0267908			374	…	0.0267908					PCP160205	0.096265	0.0126658	-0.00228109	0.0276128
PE160_182	0.523033	375	0.000154321	yes	0.0268625			375	…	0.0268625					PCP160226	0.580705	0.00389034	-0.00997938	0.0177601
Hex2Cerd182160	0.523827	376	0.000154799	yes	0.0269341			376	…	0.0269341					PCP170204a	0.604144	0.00366747	-0.0102634	0.0175984
PEP150226b	0.523854	377	0.00015528	yes	0.0270057			377	…	0.0270057					PCP170204b	0.443367	0.0053665	-0.00841521	0.0191482
PEP160204	0.525097	378	0.000155763	yes	0.0270774			378	…	0.0270774					PCP180182	0.246972	0.00754537	-0.00527114	0.0203619
Cerd181140	0.525658	379	0.00015625	yes	0.027149			379	…	0.027149					PCP180204	0.73705	0.00244762	-0.0119113	0.0168065
DE181	0.526833	380	0.00015674	yes	0.0272206			380	…	0.0272206					PCP180225	0.791316	0.00192122	-0.0123815	0.016224
PC160_160	0.530591	381	0.000157233	yes	0.0272923			381	…	0.0272923					PCP180226	0.295463	0.00757442	-0.00666759	0.0218164
LPEP160	0.532768	382	0.000157729	yes	0.0273639			382	…	0.0273639					PCP181181	0.981114	-0.00015556	-0.0131019	0.0127908
TGO544NL171	0.535413	383	0.000158228	yes	0.0274355			383	…	0.0274355					PCP181226	0.735195	0.00264708	-0.012769	0.0180632
LPC182sn2	0.53678	384	0.00015873	yes	0.0275072			384	…	0.0275072					PCP200204	0.700333	-0.00263664	-0.0161301	0.0108569
PCP160161	0.53822	385	0.000159236	yes	0.0275788			385	…	0.0275788					PCP352a	0.384895	0.00565988	-0.00715958	0.0184793
LPI182sn1	0.542316	386	0.000159744	yes	0.0276504			386	…	0.0276504					PCP352b	0.131011	0.0102046	-0.00306741	0.0234766
LPE181sn1	0.542624	387	0.000160256	yes	0.0277221			387	…	0.0277221					PCP363	0.778094	0.00197032	-0.0118024	0.0157431
PCO405	0.543155	388	0.000160772	yes	0.0277937			388	…	0.0277937					PCP385a	0.619613	-0.0037568	-0.0186614	0.0111478
TGO501NL171	0.544	389	0.00016129	yes	0.0278653			389	…	0.0278653					PCP385b	0.349855	0.00703135	-0.00776848	0.0218312
S1Pd161	0.54589	390	0.000161812	yes	0.027937			390	…	0.027937					PE15MHDA_181	0.899412	0.00077381	-0.011286	0.0128336
PI160_203a	0.546119	391	0.000162338	yes	0.0280086			391	…	0.0280086					PE15MHDA_182	0.990972	6.417e-05	-0.011108	0.0112364
PCO342	0.547156	392	0.000162866	yes	0.0280802			392	…	0.0280802					PE15MHDA_204	0.977681	0.00016943	-0.0117618	0.0121007
TGO521NL181	0.547858	393	0.000163399	yes	0.0281519			393	…	0.0281519					PE15MHDA_226	0.187054	0.0088916	-0.00435471	0.0221379
TG544NL182	0.548216	394	0.000163934	yes	0.0282235			394	…	0.0282235					PE160_160	0.752742	0.00199734	-0.0104915	0.0144862
PI181_182	0.548857	395	0.000164474	yes	0.0282951			395	…	0.0282951					PE160_161	0.724628	-0.00197888	-0.0130434	0.00908568
HexCerd182180	0.550191	396	0.000165017	yes	0.0283668			396	…	0.0283668					PE160_181	0.449673	-0.00424082	-0.0152841	0.0068024
LPC170sn1	0.554121	397	0.000165563	yes	0.0284384			397	…	0.0284384					PE160_182	0.523033	-0.00321546	-0.0131283	0.00669743
LPC224sn2	0.557873	398	0.000166113	yes	0.02851			398	…	0.02851					PE160_183a	0.826949	-0.00108745	-0.0108863	0.00871139
LPC160sn2	0.558323	399	0.000166667	yes	0.0285817			399	…	0.0285817					PE160_183b	0.444631	-0.00434163	-0.0155224	0.00683912
TGO521NL160	0.561157	400	0.000167224	yes	0.0286533			400	…	0.0286533					PE160_203	0.82715	0.00126095	-0.0101147	0.0126366
PI180_225n6	0.562832	401	0.000167785	yes	0.0287249			401	…	0.0287249					PE160_204	0.149202	-0.00784367	-0.0185273	0.00283993
Cerm181240	0.563993	402	0.00016835	yes	0.0287966			402	…	0.0287966					PE160_205	0.201633	0.00917036	-0.00494709	0.0232878
TG525NL205	0.565622	403	0.000168919	yes	0.0288682			403	…	0.0288682					PE160_226	0.710604	-0.00229685	-0.0144896	0.0098959
TGO522NL181	0.565903	404	0.000169492	yes	0.0289398			404	…	0.0289398					PE161_182	0.900658	0.00066958	-0.00989761	0.0112368
Cerd171240	0.570339	405	0.000170068	yes	0.0290115			405	…	0.0290115					PE161_204	0.642371	-0.00248225	-0.0130098	0.00804531
LPI182sn2	0.57181	406	0.000170648	yes	0.0290831			406	…	0.0290831					PE170_181	0.575454	-0.00340875	-0.0153947	0.0085772
PE170_181	0.575454	407	0.000171233	yes	0.0291547			407	…	0.0291547					PE170_182	0.946564	0.00038577	-0.0109536	0.0117252
AC150b	0.576934	408	0.000171821	yes	0.0292264			408	…	0.0292264					PE170_204	0.231711	-0.00715591	-0.018921	0.00460914
TG5810NL226	0.578331	409	0.000172414	yes	0.029298			409	…	0.029298					PE170_226	0.619251	0.00308228	-0.00913392	0.0152985
SMd181140SMd161160	0.578639	410	0.00017301	yes	0.0293696			410	…	0.0293696					PE180_181	0.983116	-0.00013347	-0.0125581	0.0122912
PEP160203a	0.578785	411	0.000173611	yes	0.0294413			411	…	0.0294413					PE180_182	0.626517	-0.00291436	-0.0147089	0.00888012
CE171	0.579566	412	0.000174216	yes	0.0295129			412	…	0.0295129					PE180_203a	0.195333	-0.00754746	-0.0190038	0.00390892
PE180_203b	0.580343	413	0.000174825	yes	0.0295845			413	…	0.0295845					PE180_203b	0.580343	-0.00329697	-0.0150403	0.00844635
PCP160226	0.580705	414	0.000175439	yes	0.0296562			414	…	0.0296562					PE180_204	0.0193811	-0.0136089	-0.024992	-0.00222581
Cerd191241	0.580951	415	0.000176056	yes	0.0297278			415	…	0.0297278					PE180_224	0.206576	-0.00676276	-0.0172886	0.00376314
TG480NL180	0.585695	416	0.000176678	yes	0.0297994			416	…	0.0297994					PE180_225n3	0.295231	-0.00658576	-0.0189628	0.00579132
Hex3Cerd181200	0.585712	417	0.000177305	yes	0.0298711			417	…	0.0298711					PE180_225n6	0.143221	-0.00815069	-0.0190882	0.00278676
Cerd171230	0.586144	418	0.000177936	yes	0.0299427			418	…	0.0299427					PE180_226	0.808821	-0.00155737	-0.0142372	0.0111225
GM3d181180	0.590009	419	0.000178571	yes	0.0300143			419	…	0.0300143					PE181_181	0.676942	-0.00238623	-0.0136667	0.0088942
SMd191241	0.591761	420	0.000179211	yes	0.030086			420	…	0.030086					PE181_182	0.815298	0.00143698	-0.0106809	0.0135549
PEP200204	0.591816	421	0.000179856	yes	0.0301576			421	…	0.0301576					PE181_226a	0.628794	-0.00288926	-0.0146598	0.00888131
LPCO181	0.591991	422	0.000180505	yes	0.0302292			422	…	0.0302292					PE181_226b	0.621888	0.00314306	-0.00940812	0.0156942
PCO354	0.594642	423	0.000181159	yes	0.0303009			423	…	0.0303009					PE200_204	0.0951706	-0.012945	-0.0281709	0.00228082
LPC183sn2a	0.594909	424	0.000181818	yes	0.0303725			424	…	0.0303725					PE360	0.359428	-0.0052889	-0.0166453	0.00606755
GM1d181160	0.596103	425	0.000182482	yes	0.0304441			425	…	0.0304441					PE385a	0.0540918	-0.011078	-0.0223527	0.00019675
TG568NL204	0.600463	426	0.00018315	yes	0.0305158			426	…	0.0305158					PE385b	0.792061	0.00153966	-0.00996454	0.0130439
TG501NL181	0.602828	427	0.000183824	yes	0.0305874			427	…	0.0305874					PEO160182	0.43854	0.00499168	-0.0076925	0.0176758
PCP170204a	0.604144	428	0.000184502	yes	0.030659			428	…	0.030659					PEO160203	0.728485	0.00245924	-0.0114951	0.0164136
CE226	0.606389	429	0.000185185	yes	0.0307307			429	…	0.0307307					PEO160204	0.91911	0.0007426	-0.0136627	0.0151479
Cerd181260	0.606473	430	0.000185874	yes	0.0308023			430	…	0.0308023					PEO160224	0.626422	-0.00325115	-0.0164053	0.00990303
LPE180sn1	0.606975	431	0.000186567	yes	0.0308739			431	…	0.0308739					PEO160226	0.345201	0.00772784	-0.00838135	0.023837
SMd180220	0.608612	432	0.000187266	yes	0.0309456			432	…	0.0309456					PEO180204	0.731499	-0.0023936	-0.0161339	0.0113467
Cerd161200	0.609001	433	0.00018797	yes	0.0310172			433	…	0.0310172					PEO180225	0.121567	0.00972717	-0.00261075	0.0220651
dhCerd180240	0.609085	434	0.000188679	yes	0.0310888			434	…	0.0310888					PEO180226	0.429812	0.00609893	-0.00910685	0.0213047
CE161	0.609199	435	0.000189394	yes	0.0311605			435	…	0.0311605					PEO181182	0.925284	0.00062956	-0.0125956	0.0138547
TG483NL161	0.61015	436	0.000190114	yes	0.0312321			436	…	0.0312321					PEO181226	0.45143	0.00579755	-0.00935855	0.0209536
LPC240sn2	0.611505	437	0.00019084	yes	0.0313037			437	…	0.0313037					PEO341	0.334825	0.00688203	-0.00715832	0.0209224
PC181_182	0.612202	438	0.000191571	yes	0.0313754			438	…	0.0313754					PEO365	0.254789	0.009309	-0.00676714	0.0253851
LPCP200	0.615593	439	0.000192308	yes	0.031447			439	…	0.031447					PEO385a	0.818207	0.00169646	-0.0128427	0.0162357
PC160_183a	0.61593	440	0.00019305	yes	0.0315186			440	…	0.0315186					PEO385b	0.303199	0.00771299	-0.00702457	0.0224505
PE170_226	0.619251	441	0.000193798	yes	0.0315903			441	…	0.0315903					PEP150204a	0.0581339	0.0108904	-0.000379	0.0221599
PCP385a	0.619613	442	0.000194553	yes	0.0316619			442	…	0.0316619					PEP150204b	0.759298	0.00197966	-0.0107471	0.0147064
PCO160204	0.621578	443	0.000195313	yes	0.0317335			443	…	0.0317335					PEP150226a	0.0638933	0.0127019	-0.0007411	0.026145
PE181_226b	0.621888	444	0.000196078	yes	0.0318052			444	…	0.0318052					PEP150226b	0.523854	0.00415176	-0.008673	0.0169765
Cerd171180	0.623043	445	0.00019685	yes	0.0318768			445	…	0.0318768					PEP160181	0.897677	0.0007954	-0.0113895	0.0129803
PG362	0.625191	446	0.000197628	yes	0.0319484			446	…	0.0319484					PEP160182	0.98824	-9.428e-05	-0.0126955	0.0125069
PC181_226b	0.626276	447	0.000198413	yes	0.0320201			447	…	0.0320201					PEP160183	0.0410433	0.0139765	0.00057463	0.0273783
PEO160224	0.626422	448	0.000199203	yes	0.0320917			448	…	0.0320917					PEP160203a	0.578785	-0.00345773	-0.0157228	0.00880731
PE180_182	0.626517	449	0.0002	yes	0.0321633			449	…	0.0321633					PEP160203b	0.262971	-0.00755859	-0.0208393	0.00572215
PE181_226a	0.628794	450	0.000200803	yes	0.032235			450	…	0.032235					PEP160204	0.525097	-0.00465695	-0.0190855	0.00977156
PEP180182	0.630859	451	0.000201613	yes	0.0323066			451	…	0.0323066					PEP160205	0.148427	0.0112073	-0.00402851	0.0264432
DG160_161	0.632391	452	0.000202429	yes	0.0323782			452	…	0.0323782					PEP160224	0.155722	-0.0115747	-0.0275943	0.00444483
DG160_226	0.635325	453	0.000203252	yes	0.0324499			453	…	0.0324499					PEP160225n3	0.830114	0.0014559	-0.0119113	0.0148231
PC387c	0.636853	454	0.000204082	yes	0.0325215			454	…	0.0325215					PEP160225n6	0.0817097	-0.0106061	-0.0225602	0.00134797
DG160_225	0.641206	455	0.000204918	yes	0.0325931			455	…	0.0325931					PEP160226	0.720069	0.00267336	-0.0120204	0.0173671
PE161_204	0.642371	456	0.000205761	yes	0.0326648			456	…	0.0326648					PEP170204a	0.367747	0.00667905	-0.00791378	0.0212719
PC360	0.643837	457	0.000206612	yes	0.0327364			457	…	0.0327364					PEP170204b	0.86352	0.0011403	-0.0119278	0.0142084
LPE181sn2	0.644742	458	0.000207469	yes	0.032808			458	…	0.032808					PEP170226a	0.0493716	0.0136833	3.802e-05	0.0273285
LPCO241	0.650045	459	0.000208333	yes	0.0328797			459	…	0.0328797					PEP170226b	0.0745649	0.0121992	-0.00122173	0.0256201
Cerd191200	0.651147	460	0.000209205	yes	0.0329513			460	…	0.0329513					PEP180181	0.774235	0.00192449	-0.0112916	0.0151406
LPC203sn1	0.654115	461	0.000210084	yes	0.0330229			461	…	0.0330229					PEP180182	0.630859	0.00310445	-0.00961936	0.0158283
Cerm180241	0.654491	462	0.00021097	yes	0.0330946			462	…	0.0330946					PEP180183	0.112742	0.011606	-0.00276214	0.0259741
TG521NL180	0.654815	463	0.000211864	yes	0.0331662			463	…	0.0331662					PEP180203a	0.841334	0.00125361	-0.0110825	0.0135897
Cerd182230	0.655285	464	0.000212766	yes	0.0332378			464	…	0.0332378					PEP180203b	0.368623	0.00596063	-0.00708672	0.019008
HexCerd181241	0.655861	465	0.000213675	yes	0.0333095			465	…	0.0333095					PEP180204	0.947405	0.00046967	-0.0135566	0.0144959
DE226	0.655879	466	0.000214592	yes	0.0333811			466	…	0.0333811					PEP180205	0.071441	0.01352	-0.00119139	0.0282313
CE183	0.660252	467	0.000215517	yes	0.0334527			467	…	0.0334527					PEP180224	0.122333	-0.0159345	-0.0361874	0.00431838
AC170a	0.667323	468	0.00021645	yes	0.0335244			468	…	0.0335244					PEP180225n3	0.923889	0.00071858	-0.0140991	0.0155363
LPC224sn1	0.672031	469	0.000217391	yes	0.033596			469	…	0.033596					PEP180225n6	0.446362	-0.00538478	-0.0193049	0.0085353
Cerm180230	0.673786	470	0.000218341	yes	0.0336676			470	…	0.0336676					PEP180226	0.507302	0.00494621	-0.00974138	0.0196338
PI15MHDA_204PI170_204	0.674388	471	0.000219298	yes	0.0337393			471	…	0.0337393					PEP181181	0.710118	0.00266084	-0.0114393	0.016761
TG483NL140	0.675454	472	0.000220264	yes	0.0338109			472	…	0.0338109					PEP181181a	0.746253	0.00233944	-0.0119016	0.0165805
PE181_181	0.676942	473	0.000221239	yes	0.0338825			473	…	0.0338825					PEP181181b	0.491386	0.00426717	-0.00794229	0.0164766
PC150_203	0.677262	474	0.000222222	yes	0.0339542			474	…	0.0339542					PEP181182a	0.823093	0.00148652	-0.0116115	0.0145845
DG160_182	0.677346	475	0.000223214	yes	0.0340258			475	…	0.0340258					PEP181182b	0.111318	0.0100726	-0.00234759	0.0224928
HexCerd181160	0.679979	476	0.000224215	yes	0.0340974			476	…	0.0340974					PEP181183	0.856399	0.00113087	-0.0111799	0.0134417
LPC160sn1	0.680801	477	0.000225225	yes	0.0341691			477	…	0.0341691					PEP181203a	0.729335	0.00232003	-0.0108872	0.0155272
PCO160160	0.681028	478	0.000226244	yes	0.0342407			478	…	0.0342407					PEP181203b	0.86182	0.00122078	-0.0125962	0.0150377
LPE180sn2	0.682583	479	0.000227273	yes	0.0343123			479	…	0.0343123					PEP181204a	0.961007	-0.00032337	-0.0133536	0.0127069
PI180_202	0.683465	480	0.000228311	yes	0.034384			480	…	0.034384					PEP181204b	0.402034	0.00590772	-0.00796774	0.0197832
Cerd161220	0.694936	481	0.000229358	yes	0.0344556			481	…	0.0344556					PEP181205a	0.121429	0.0114141	-0.00305798	0.0258863
Sulfatided181241	0.700078	482	0.000230415	yes	0.0345272			482	…	0.0345272					PEP181205b	0.0807201	0.0126235	-0.00155777	0.0268047
PCP200204	0.700333	483	0.000231481	yes	0.0345989			483	…	0.0345989					PEP181224	0.0806082	-0.0129326	-0.0274556	0.00159042
CE180	0.702745	484	0.000232558	yes	0.0346705			484	…	0.0346705					PEP181225a	0.860094	0.00126515	-0.0128752	0.0154055
SM441	0.707405	485	0.000233645	yes	0.0347421			485	…	0.0347421					PEP181225b	0.251706	-0.00800452	-0.0217384	0.00572931
TG547NL205	0.709846	486	0.000234742	yes	0.0348138			486	…	0.0348138					PEP181226a	0.502698	0.00488939	-0.0094732	0.019252
PEP181181	0.710118	487	0.000235849	yes	0.0348854			487	…	0.0348854					PEP181226b	0.20261	0.00940743	-0.00510674	0.0239216
PE160_226	0.710604	488	0.000236967	yes	0.034957			488	…	0.034957					PEP190204a	0.0417117	0.0127724	0.00048442	0.0250605
PCO180204	0.712537	489	0.000238095	yes	0.0350287			489	…	0.0350287					PEP190204b	0.928384	-0.00058298	-0.0133612	0.0121952
LPC200sn2	0.714355	490	0.000239234	yes	0.0351003			490	…	0.0351003					PEP200181	0.899159	-0.0009186	-0.0151989	0.0133617
Hex3Cerd181240	0.7152	491	0.000240385	yes	0.0351719			491	…	0.0351719					PEP200182	0.720155	0.00235783	-0.0106061	0.0153218
PI180_224	0.717029	492	0.000241546	yes	0.0352436			492	…	0.0352436					PEP200204	0.591816	-0.00531567	-0.0248386	0.0142073
Cerm180220	0.717331	493	0.000242718	yes	0.0353152			493	…	0.0353152					PEP200226	0.333838	0.00693379	-0.00718352	0.0210511
Hex2Cerd181160	0.719568	494	0.000243902	yes	0.0353868			494	…	0.0353868					PEP201204	0.355847	-0.00456835	-0.0143049	0.00516819
LPE160sn1	0.719898	495	0.000245098	yes	0.0354585			495	…	0.0354585					PEP201226	0.314433	0.00549476	-0.00525167	0.0162412
PEP160226	0.720069	496	0.000246305	yes	0.0355301			496	…	0.0355301					PG341	0.2792	-0.00688095	-0.0193885	0.00562656
PEP200182	0.720155	497	0.000247525	yes	0.0356017			497	…	0.0356017					PG342	0.739051	0.00163258	-0.00802121	0.0112864
LPC226sn2	0.721416	498	0.000248756	yes	0.0356734			498	…	0.0356734					PG361	0.983607	0.00013217	-0.0125406	0.0128049
dhCerd180160	0.722167	499	0.00025	yes	0.035745			499	…	0.035745					PG362	0.625191	-0.00316216	-0.0159104	0.00958606
Cerm181180	0.723396	500	0.000251256	yes	0.0358166			500	…	0.0358166					PI15MHDA_181PI170_181	0.0932109	0.0110457	-0.00186836	0.0239597
Sulfatided181160OH	0.72343	501	0.000252525	yes	0.0358883			501	…	0.0358883					PI15MHDA_182PI170_182	0.15467	0.00796353	-0.0030299	0.018957
DG160_160	0.7236	502	0.000253807	yes	0.0359599			502	…	0.0359599					PI15MHDA_204PI170_204	0.674388	-0.0026464	-0.0150527	0.00975988
PE160_161	0.724628	503	0.000255102	yes	0.0360315			503	…	0.0360315					PI160160	0.211611	0.00764946	-0.00438948	0.0196884
PEO160203	0.728485	504	0.00025641	yes	0.0361032			504	…	0.0361032					PI160_161	0.336104	0.00490357	-0.00512701	0.0149342
PEP181203a	0.729335	505	0.000257732	yes	0.0361748			505	…	0.0361748					PI160_203a	0.546119	0.003504	-0.00792713	0.0149351
PEO180204	0.731499	506	0.000259067	yes	0.0362464			506	…	0.0362464					PI160_203b	0.292169	0.00588098	-0.00510147	0.0168634
PCO181182	0.731598	507	0.000260417	yes	0.0363181			507	…	0.0363181					PI160_204	0.304282	-0.0061892	-0.0180415	0.00566314
PS362	0.732738	508	0.00026178	yes	0.0363897			508	…	0.0363897					PI180_181	0.141603	0.00921219	-0.00309941	0.0215238
LPC204sn1	0.733366	509	0.000263158	yes	0.0364613			509	…	0.0364613					PI180_202	0.683465	0.00220816	-0.00845846	0.0128748
PCP181226	0.735195	510	0.00026455	yes	0.036533			510	…	0.036533					PI180_203a	0.90005	-0.00081328	-0.0135695	0.011943
TG482NL141	0.736118	511	0.000265957	yes	0.0366046			511	…	0.0366046					PI180_203b	0.940424	-0.00047467	-0.0129868	0.0120375
TG568NL226	0.736214	512	0.00026738	yes	0.0366762			512	…	0.0366762					PI180_204	0.400572	-0.0057199	-0.0191125	0.00767272
PCP180204	0.73705	513	0.000268817	yes	0.0367479			513	…	0.0367479					PI180_224	0.717029	0.0023622	-0.0104756	0.0152
Hex3Cerd181180	0.738775	514	0.00027027	yes	0.0368195			514	…	0.0368195					PI180_225n3	0.222443	0.00864083	-0.00528396	0.0225656
PG342	0.739051	515	0.000271739	yes	0.0368911			515	…	0.0368911					PI180_225n6	0.562832	0.00327204	-0.00786298	0.014407
HexCerd161220	0.739512	516	0.000273224	yes	0.0369628			516	…	0.0369628					PI180_226	0.0727277	0.0120417	-0.00112098	0.0252043
PCO180182	0.739976	517	0.000274725	yes	0.0370344			517	…	0.0370344					PI181_182	0.548857	0.00387025	-0.00884241	0.0165829
Hex2Cerd181180	0.741409	518	0.000276243	yes	0.037106			518	…	0.037106					PI200_204	0.848143	-0.00112859	-0.0127393	0.0104821
PEP181181a	0.746253	519	0.000277778	yes	0.0371777			519	…	0.0371777					PI340	0.176875	0.00872959	-0.00397433	0.0214335
LPE160sn2	0.748921	520	0.00027933	yes	0.0372493			520	…	0.0372493					PI341	0.278409	0.006261	-0.00510086	0.0176229
PS406	0.749654	521	0.000280899	yes	0.0373209			521	…	0.0373209					PI362	0.959315	-0.00031361	-0.0124246	0.0117974
LPCO220	0.75097	522	0.000282486	yes	0.0373926			522	…	0.0373926					PI376	0.171683	0.0090296	-0.0039527	0.0220119
TG503NL183	0.751759	523	0.000284091	yes	0.0374642			523	…	0.0374642					PI385a	0.390413	-0.00545849	-0.0179667	0.00704969
PE160_160	0.752742	524	0.000285714	yes	0.0375358			524	…	0.0375358					PI385b	0.78927	0.00160213	-0.0102065	0.0134108
LPC190sn1b	0.756107	525	0.000287356	yes	0.0376074			525	…	0.0376074					PI386	0.277344	0.00711542	-0.00576828	0.0199991
LPEP180	0.756381	526	0.000289017	yes	0.0376791			526	…	0.0376791					PI396	0.190793	0.00882144	-0.00443227	0.0220752
PC322	0.758569	527	0.000290698	yes	0.0377507			527	…	0.0377507					PS361	0.363938	-0.0109183	-0.034584	0.0127475
SM352b	0.758894	528	0.000292398	yes	0.0378223			528	…	0.0378223					PS362	0.732738	-0.0029961	-0.020278	0.0142858
LPCO242	0.759195	529	0.000294118	yes	0.037894			529	…	0.037894					PS383	0.18331	-0.0119347	-0.0295627	0.0056933
PEP150204b	0.759298	530	0.000295858	yes	0.0379656			530	…	0.0379656					PS384	0.146369	-0.0128036	-0.0301207	0.00451353
dhCerd180220	0.761253	531	0.000297619	yes	0.0380372			531	…	0.0380372					PS385	0.884089	0.00098891	-0.0123739	0.0143517
Hex3Cerd181241	0.762723	532	0.000299401	yes	0.0381089			532	…	0.0381089					PS405	0.499391	-0.00520089	-0.0203608	0.00995903
LPC220sn2	0.763008	533	0.000301205	yes	0.0381805			533	…	0.0381805					PS406	0.749654	-0.00219681	-0.0157577	0.0113641
Cerd171220	0.766985	534	0.00030303	yes	0.0382521			534	…	0.0382521					S1Pd161	0.54589	0.00419931	-0.00949233	0.0178909
PCO180181	0.767236	535	0.000304878	yes	0.0383238			535	…	0.0383238					S1Pd180	0.0295322	-0.0134774	-0.0256005	-0.0013543
SM432b	0.767252	536	0.000306748	yes	0.0383954			536	…	0.0383954					S1Pd181	0.443	-0.00496402	-0.0177018	0.00777379
LPC183sn1aLPC183s	0.767467	537	0.000308642	yes	0.038467			537	…	0.038467					S1Pd182	0.156638	-0.00942117	-0.0224892	0.00364687
HexCerd181180	0.767783	538	0.000310559	yes	0.0385387			538	…	0.0385387					SM343	0.452576	-0.00485783	-0.0175893	0.00787359
TG569NL226	0.770537	539	0.0003125	yes	0.0386103			539	…	0.0386103					SM352b	0.758894	-0.00200102	-0.0148432	0.0108412
SMd171160	0.772377	540	0.000314465	yes	0.0386819			540	…	0.0386819					SM371	0.384561	-0.00632688	-0.020647	0.00799322
PEP180181	0.774235	541	0.000316456	yes	0.0387536			541	…	0.0387536					SM372	0.109771	-0.0112149	-0.0249831	0.00255337
PC4412	0.774262	542	0.000318471	yes	0.0388252			542	…	0.0388252					SM383a	0.274127	-0.00763514	-0.0213673	0.00609698
LPC181sn2	0.776624	543	0.000320513	yes	0.0388968			543	…	0.0388968					SM383b	0.260023	-0.00770722	-0.0211649	0.00575047
TG567NL205	0.777248	544	0.000322581	yes	0.0389685			544	…	0.0389685					SM403a	0.388758	-0.00623889	-0.0204855	0.00800768
PCP363	0.778094	545	0.000324675	yes	0.0390401			545	…	0.0390401					SM403b	0.975618	-0.00021236	-0.0139007	0.0134759
PC170_182	0.778187	546	0.000326797	yes	0.0391117			546	…	0.0391117					SM410	0.974705	-0.00024129	-0.0152327	0.0147501
Hex2Cerd182241	0.780189	547	0.000328947	yes	0.0391834			547	…	0.0391834					SM411a	0.792002	0.00173054	-0.0111961	0.0146572
TG501NL160	0.780765	548	0.000331126	yes	0.039255			548	…	0.039255					SM431	0.889429	0.00100411	-0.0132239	0.0152321
PCP160204	0.780946	549	0.000333333	yes	0.0393266			549	…	0.0393266					SM432b	0.767252	-0.00205241	-0.0157121	0.0116072
PCO321	0.783832	550	0.00033557	yes	0.0393983			550	…	0.0393983					SM432c	0.953934	0.0004142	-0.0137109	0.0145393
LPE226sn2	0.784235	551	0.000337838	yes	0.0394699			551	…	0.0394699					SM441	0.707405	-0.00275978	-0.0172421	0.0117226
PI385b	0.78927	552	0.000340136	yes	0.0395415			552	…	0.0395415					SM442	0.366534	-0.00688982	-0.021905	0.00812535
PCP180225	0.791316	553	0.000342466	yes	0.0396132			553	…	0.0396132					SM443	0.185526	-0.00972452	-0.024161	0.00471201
SM411a	0.792002	554	0.000344828	yes	0.0396848			554	…	0.0396848					SMd161190	0.472314	0.00498743	-0.00867393	0.0186488
PE385b	0.792061	555	0.000347222	yes	0.0397564			555	…	0.0397564					SMd161230SMd171220	0.869633	0.00114197	-0.0125651	0.014849
LPEP200	0.793122	556	0.00034965	yes	0.0398281			556	…	0.0398281					SMd161241	0.960311	0.00034578	-0.013343	0.0140345
LPCO200	0.793302	557	0.000352113	yes	0.0398997			557	…	0.0398997					SMd171140	0.384797	0.00562483	-0.00711259	0.0183623
LPCO180	0.79375	558	0.00035461	yes	0.0399713			558	…	0.0399713					SMd171160	0.772377	0.00204295	-0.0118689	0.0159548
Cerd191160	0.794992	559	0.000357143	yes	0.040043			559	…	0.040043					SMd171241	0.96738	-0.00028622	-0.0140748	0.0135023
LPC161sn2	0.795799	560	0.000359712	yes	0.0401146			560	…	0.0401146					SMd180140	0.187156	0.0088603	-0.00434227	0.0220629
Cerd201241	0.795983	561	0.000362319	yes	0.0401862			561	…	0.0401862					SMd180160	0.462181	-0.00611008	-0.0224695	0.0102493
TG481NL161	0.796607	562	0.000364964	yes	0.0402579			562	…	0.0402579					SMd180220	0.608612	-0.0040669	-0.0197081	0.0115743
LPC225sn1n3LPC225	0.797411	563	0.000367647	yes	0.0403295			563	…	0.0403295					SMd181140SMd161160	0.578639	0.00369797	-0.00941419	0.0168101
PCO181181	0.798423	564	0.00037037	yes	0.0404011			564	…	0.0404011					SMd181160	0.146734	-0.0111668	-0.0262839	0.00395026
TG482NL161	0.803155	565	0.000373134	yes	0.0404728			565	…	0.0404728					SMd181170SMd171180	0.84948	-0.00145825	-0.016595	0.0136785
LPC225sn2n3	0.806274	566	0.00037594	yes	0.0405444			566	…	0.0405444					SMd181180SMd161200	0.0902966	-0.0125611	-0.0271147	0.00199246
PCP160181	0.807613	567	0.000378788	yes	0.040616			567	…	0.040616					SMd181200SMd161220	0.116887	-0.0113844	-0.0256413	0.0028724
PE180_226	0.808821	568	0.000381679	yes	0.0406877			568	…	0.0406877					SMd181220SMd161240	0.0810962	-0.0144744	-0.0307552	0.00180641
DG182_226	0.810214	569	0.000384615	yes	0.0407593			569	…	0.0407593					SMd181230SMd171240	0.324114	-0.00685977	-0.0205474	0.00682784
TGO542NL181	0.815101	570	0.000387597	yes	0.0408309			570	…	0.0408309					SMd181240	0.0832741	-0.0132092	-0.0281739	0.00175544
PE181_182	0.815298	571	0.000390625	yes	0.0409026			571	…	0.0409026					SMd181241	0.0447848	-0.0133191	-0.0263249	-0.00031323
TG482NL140	0.815499	572	0.000393701	yes	0.0409742			572	…	0.0409742					SMd182140	0.0897584	-0.0104141	-0.0224598	0.00163156
LPC221sn1	0.816647	573	0.000396825	yes	0.0410458			573	…	0.0410458					SMd182160	0.0075155	-0.0182341	-0.0315446	-0.00492352
PC321	0.817942	574	0.0004	yes	0.0411175			574	…	0.0411175					SMd182170	0.379242	-0.00622821	-0.020168	0.00771159
PEO385a	0.818207	575	0.000403226	yes	0.0411891			575	…	0.0411891					SMd182180	0.0158766	-0.0177775	-0.0321868	-0.00336829
PEP181182a	0.823093	576	0.000406504	yes	0.0412607			576	…	0.0412607					SMd182181	0.0251222	-0.0141693	-0.0265504	-0.00178819
TG480NL160	0.825392	577	0.000409836	yes	0.0413324			577	…	0.0413324					SMd182200	0.00822848	-0.0197776	-0.034385	-0.00517024
PE160_183a	0.826949	578	0.000413223	yes	0.041404			578	…	0.041404					SMd182220	0.0157731	-0.0182654	-0.0330553	-0.00347559
PE160_203	0.82715	579	0.000416667	yes	0.0414756			579	…	0.0414756					SMd182230	0.323086	-0.00708186	-0.0211826	0.00701883
Cerd161180	0.829666	580	0.000420168	yes	0.0415473			580	…	0.0415473					SMd182240	0.146152	-0.0103848	-0.0244229	0.00365326
PEP160225n3	0.830114	581	0.000423729	yes	0.0416189			581	…	0.0416189					SMd191241	0.591761	0.0037968	-0.0101454	0.017739
PC331	0.834993	582	0.00042735	yes	0.0416905			582	…	0.0416905					Sphd161	0.466035	-0.00478714	-0.0177157	0.00814137
PC161_226	0.838253	583	0.000431034	yes	0.0417622			583	…	0.0417622					Sphd181	0.914374	0.00089486	-0.0155006	0.0172903
LPC260sn2	0.840335	584	0.000434783	yes	0.0418338			584	…	0.0418338					Sphd182	0.264043	-0.00774493	-0.0213833	0.00589342
PEP180203a	0.841334	585	0.000438596	yes	0.0419054			585	…	0.0419054					Sulfatided181160	0.491663	0.00513374	-0.00956426	0.0198317
dhCerd180241	0.842757	586	0.000442478	yes	0.0419771			586	…	0.0419771					Sulfatided181160OH	0.72343	0.00285327	-0.0130282	0.0187348
LPC221sn2	0.8429	587	0.000446429	yes	0.0420487			587	…	0.0420487					Sulfatided181180	0.0156247	0.0155021	0.00296792	0.0280363
Cerd182260	0.848111	588	0.00045045	yes	0.0421203			588	…	0.0421203					Sulfatided181180OH	0.449	-0.00478157	-0.0172144	0.00765128
PI200_204	0.848143	589	0.000454545	yes	0.042192			589	…	0.042192					Sulfatided181240	0.0596111	0.011285	-0.00046175	0.0230317
SMd181170SMd171180	0.84948	590	0.000458716	yes	0.0422636			590	…	0.0422636					Sulfatided181240OH	0.282531	0.00780559	-0.00648154	0.0220927
TGO502NL161	0.850011	591	0.000462963	yes	0.0423352			591	…	0.0423352					Sulfatided181241	0.700078	-0.00240689	-0.0147136	0.00989982
Cerd201240	0.850501	592	0.00046729	yes	0.0424069			592	…	0.0424069					Sulfatided181241OH	0.369852	0.00629513	-0.00751962	0.0201099
PC385b	0.852253	593	0.000471698	yes	0.0424785			593	…	0.0424785					TG480NL160	0.825392	0.00131936	-0.0104615	0.0131002
PC15MHDA_181	0.852419	594	0.00047619	yes	0.0425501			594	…	0.0425501					TG480NL180	0.585695	0.00354821	-0.0092706	0.016367
PEP181183	0.856399	595	0.000480769	yes	0.0426218			595	…	0.0426218					TG481NL161	0.796607	-0.00137639	-0.0118959	0.00914314
TG500NL180	0.857692	596	0.000485437	yes	0.0426934			596	…	0.0426934					TG481NL181	0.478794	0.00486412	-0.00865681	0.018385
LPC202sn2	0.858454	597	0.000490196	yes	0.042765			597	…	0.042765					TG482NL140	0.815499	-0.00132859	-0.0125449	0.00988771
PEP181225a	0.860094	598	0.00049505	yes	0.0428367			598	…	0.0428367					TG482NL141	0.736118	0.00214827	-0.0104083	0.0147048
PEP181203b	0.86182	599	0.0005	yes	0.0429083			599	…	0.0429083					TG482NL161	0.803155	-0.00133515	-0.0118865	0.00921622
PEP170204b	0.86352	600	0.000505051	yes	0.0429799			600	…	0.0429799					TG482NL182	0.401292	0.00502211	-0.00675472	0.0167989
LPC180sn2	0.864866	601	0.000510204	yes	0.0430516			601	…	0.0430516					TG483NL140	0.675454	-0.0023816	-0.0135854	0.00882221
Cerm180240	0.865498	602	0.000515464	yes	0.0431232			602	…	0.0431232					TG483NL161	0.61015	-0.00291002	-0.0141501	0.00833008
Cerd171241	0.867216	603	0.000520833	yes	0.0431948			603	…	0.0431948					TG483NL183	0.491094	0.00392014	-0.00728854	0.0151288
DG140_182	0.869123	604	0.000526316	yes	0.0432665			604	…	0.0432665					TG491NL161	0.963223	-0.00029363	-0.0128392	0.0122519
TG589NL226	0.869233	605	0.000531915	yes	0.0433381			605	…	0.0433381					TG491NL171	0.925226	0.00057106	-0.0114158	0.0125579
SMd161230SMd171220	0.869633	606	0.000537634	yes	0.0434097			606	…	0.0434097					TG500NL180	0.857692	0.00128161	-0.0127983	0.0153615
LPC226sn1	0.870759	607	0.000543478	yes	0.0434814			607	…	0.0434814					TG501NL140	0.0720222	0.0126614	-0.0011442	0.026467
PC15MHDA_182	0.871259	608	0.000549451	yes	0.043553			608	…	0.043553					TG501NL160	0.780765	-0.00167768	-0.0135515	0.0101962
Hex2Cerd161241	0.873294	609	0.000555556	yes	0.0436246			609	…	0.0436246					TG501NL181	0.602828	0.00335337	-0.00933817	0.0160449
LPE226sn1	0.875988	610	0.000561798	yes	0.0436963			610	…	0.0436963					TG502NL140	0.401359	-0.00576056	-0.019271	0.00774986
PC386a	0.877202	611	0.000568182	yes	0.0437679			611	…	0.0437679					TG502NL161	0.15493	-0.0084614	-0.0201495	0.00322672
TG504NL204	0.880201	612	0.000574713	yes	0.0438395			612	…	0.0438395					TG502NL181	0.269132	-0.0072626	-0.0201889	0.00566367
TG547NL226	0.880929	613	0.000581395	yes	0.0439112			613	…	0.0439112					TG502NL182	0.513385	0.00382754	-0.00770305	0.0153581
PC171_182	0.881328	614	0.000588235	yes	0.0439828			614	…	0.0439828					TG503NL140	0.956903	0.00035453	-0.0125697	0.0132787
PS385	0.884089	615	0.000595238	yes	0.0440544			615	…	0.0440544					TG503NL141	0.455575	-0.0053049	-0.0193009	0.00869106
PCO160203	0.885597	616	0.00060241	yes	0.0441261			616	…	0.0441261					TG503NL161	0.160601	-0.00838133	-0.0201188	0.00335611
SM431	0.889429	617	0.000609756	yes	0.0441977			617	…	0.0441977					TG503NL182	0.172934	-0.00833251	-0.0203477	0.0036827
PC408	0.890108	618	0.000617284	yes	0.0442693			618	…	0.0442693					TG503NL183	0.751759	-0.0019273	-0.0139289	0.0100743
PC160_226	0.891884	619	0.000625	yes	0.044341			619	…	0.044341					TG504NL140	0.518776	-0.00394574	-0.0159863	0.0080948
PEP160181	0.897677	620	0.000632911	yes	0.0444126			620	…	0.0444126					TG504NL183	0.350212	-0.00530944	-0.0164932	0.00587436
PC140_204	0.897901	621	0.000641026	yes	0.0444842			621	…	0.0444842					TG504NL204	0.880201	-0.00085246	-0.0119949	0.01029
TG511NL170	0.897916	622	0.000649351	yes	0.0445559			622	…	0.0445559					TG510NL160	0.968537	0.00031463	-0.0154001	0.0160294
PCP160140	0.899153	623	0.000657895	yes	0.0446275			623	…	0.0446275					TG511NL170	0.897916	-0.00092683	-0.0151585	0.0133049
PEP200181	0.899159	624	0.000666667	yes	0.0446991			624	…	0.0446991					TG512NL150	0.368124	-0.00608449	-0.0193888	0.0072198
PE15MHDA_181	0.899412	625	0.000675676	yes	0.0447708			625	…	0.0447708					TG512NL170	0.455824	-0.00480081	-0.0174738	0.00787222
Cerd201220	0.899595	626	0.000684932	yes	0.0448424			626	…	0.0448424					TG512NL171	0.455824	-0.00480081	-0.0174738	0.00787222
PI180_203a	0.90005	627	0.000694444	yes	0.044914			627	…	0.044914					TG521NL180	0.654815	0.00338238	-0.0115179	0.0182826
PE161_182	0.900658	628	0.000704225	yes	0.0449857			628	…	0.0449857					TG521NL181	0.0768875	-0.0126109	-0.0265961	0.00137435
CE225n6	0.904902	629	0.000714286	yes	0.0450573			629	…	0.0450573					TG522NL160	0.0444585	-0.0140043	-0.0276582	-0.00035047
TG532NL171	0.90866	630	0.000724638	yes	0.0451289			630	…	0.0451289					TG522NL182	0.137087	0.00989577	-0.00317837	0.0229699
LPCO160	0.910946	631	0.000735294	yes	0.0452006			631	…	0.0452006					TG523NL161	0.226523	-0.00749375	-0.0196772	0.00468969
Cerd201260	0.913054	632	0.000746269	yes	0.0452722			632	…	0.0452722					TG523NL182	0.0552461	-0.0135542	-0.0274158	0.00030733
PC395b	0.913228	633	0.000757576	yes	0.0453438			633	…	0.0453438					TG524NL161	0.00205528	-0.0189612	-0.0309278	-0.00699464
PCP160182	0.914107	634	0.000769231	yes	0.0454155			634	…	0.0454155					TG524NL182	0.0975418	-0.0112123	-0.0244951	0.00207038
DG140_160	0.914241	635	0.00078125	yes	0.0454871			635	…	0.0454871					TG524NL183	0.0249467	-0.0149556	-0.0280078	-0.00190342
Sphd181	0.914374	636	0.000793651	yes	0.0455587			636	…	0.0455587					TG525NL183	0.122786	-0.00890204	-0.0202304	0.00242632
HexCerd161200	0.914555	637	0.000806452	yes	0.0456304			637	…	0.0456304					TG525NL204	0.517417	-0.00358224	-0.0144781	0.00731359
Cerd201230	0.915097	638	0.000819672	yes	0.045702			638	…	0.045702					TG525NL205	0.565622	0.00381982	-0.00927286	0.0169125
PC15MHDA_204	0.917402	639	0.000833333	yes	0.0457736			639	…	0.0457736					TG532NL171	0.90866	-0.00084565	-0.0153662	0.0136749
LPC161sn1	0.917793	640	0.000847458	yes	0.0458453			640	…	0.0458453					TG532NL181	0.299376	-0.00726556	-0.0210382	0.00650712
PEO160204	0.91911	641	0.000862069	yes	0.0459169			641	…	0.0459169					TG540NL180	0.48666	0.00501692	-0.00918195	0.0192158
Hex2Cerd181241	0.91932	642	0.000877193	yes	0.0459885			642	…	0.0459885					TG541NL181	0.406242	0.00618094	-0.00846703	0.0208289
PC150_204	0.921667	643	0.000892857	yes	0.0460602			643	…	0.0460602					TG542NL180	0.946626	0.00048129	-0.0136819	0.0146445
Cerm181230	0.923703	644	0.000909091	yes	0.0461318			644	…	0.0461318					TG542NL201	0.29276	-0.00625527	-0.0179511	0.00544051
PEP180225n3	0.923889	645	0.000925926	yes	0.0462034			645	…	0.0462034					TG543NL181	0.159228	-0.00846261	-0.0202748	0.00334958
Cerd181230	0.924182	646	0.000943396	yes	0.0462751			646	…	0.0462751					TG543NL182	0.473553	-0.00468377	-0.0175494	0.00818183
TG491NL171	0.925226	647	0.000961538	yes	0.0463467			647	…	0.0463467					TG544NL182	0.548216	-0.00391108	-0.0167372	0.00891509
PEO181182	0.925284	648	0.000980392	yes	0.0464183			648	…	0.0464183					TG544NL203	0.176309	-0.00794935	-0.0195026	0.00360391
PEP190204b	0.928384	649	0.001	yes	0.04649			649	…	0.04649					TG545NL183	0.165126	-0.00883471	-0.0213417	0.00367223
TGO522NL160	0.931903	650	0.00102041	yes	0.0465616			650	…	0.0465616					TG545NL204	0.108587	-0.00965691	-0.0214726	0.00215882
Cerd171200	0.932951	651	0.00104167	yes	0.0466332			651	…	0.0466332					TG546NL183	0.430856	-0.00444033	-0.0155361	0.0066554
LPC201sn2	0.935972	652	0.00106383	yes	0.0467049			652	…	0.0467049					TG546NL204	0.0358571	-0.0116284	-0.0224807	-0.00077606
LPC181sn1	0.936519	653	0.00108696	yes	0.0467765			653	…	0.0467765					TG546NL205	0.400387	0.00585329	-0.00784625	0.0195528
GM3d181240	0.937307	654	0.00111111	yes	0.0468481			654	…	0.0468481					TG546NL226	0.975507	0.00019615	-0.0123899	0.0127822
PI180_203b	0.940424	655	0.00113636	yes	0.0469198			655	…	0.0469198					TG547NL205	0.709846	0.00237019	-0.0101774	0.0149178
LPCP160	0.942771	656	0.00116279	yes	0.0469914			656	…	0.0469914					TG547NL226	0.880929	-0.00095896	-0.0135708	0.0116529
PE170_182	0.946564	657	0.00119048	yes	0.047063			657	…	0.047063					TG566NL204	0.0320336	-0.0140619	-0.0269038	-0.00121996
TG542NL180	0.946626	658	0.00121951	yes	0.0471347			658	…	0.0471347					TG566NL225a	0.0754383	-0.0105152	-0.0221185	0.00108807
PEP180204	0.947405	659	0.00125	yes	0.0472063			659	…	0.0472063					TG566NL225b	0.0754383	-0.0105152	-0.0221185	0.00108807
DG180_182	0.949965	660	0.00128205	yes	0.0472779			660	…	0.0472779					TG567NL204	0.459736	-0.00469545	-0.0171988	0.00780791
LPC202sn1	0.95096	661	0.00131579	yes	0.0473496			661	…	0.0473496					TG567NL205	0.777248	0.00229013	-0.0136556	0.0182359
PC160_180	0.951482	662	0.00135135	yes	0.0474212			662	…	0.0474212					TG567NL225a	0.0751052	-0.0104961	-0.0220651	0.00107277
SM432c	0.953934	663	0.00138889	yes	0.0474928			663	…	0.0474928					TG567NL225b	0.0723926	-0.0105623	-0.0220943	0.00096962
DE182	0.955386	664	0.00142857	yes	0.0475645			664	…	0.0475645					TG567NL226	0.512118	-0.00406697	-0.016282	0.0081481
LPC183sn1b	0.955902	665	0.00147059	yes	0.0476361			665	…	0.0476361					TG568NL204	0.600463	-0.00297448	-0.014159	0.00821002
TG503NL140	0.956903	666	0.00151515	yes	0.0477077			666	…	0.0477077					TG568NL205	0.292809	0.00719513	-0.00625933	0.0206496
PCO407a	0.957142	667	0.0015625	yes	0.0477794			667	…	0.0477794					TG568NL226	0.736214	-0.00197343	-0.0135124	0.00956557
LPCO240	0.95736	668	0.0016129	yes	0.047851			668	…	0.047851					TG569NL226	0.770537	0.00187015	-0.0107599	0.0145002
GM3d181241	0.957438	669	0.00166667	yes	0.0479226			669	…	0.0479226					TG5810NL226	0.578331	0.00323438	-0.00822469	0.0146935
Cerd191260	0.957804	670	0.00172414	yes	0.0479943			670	…	0.0479943					TG588NL226	0.484194	-0.00453595	-0.0173011	0.00822923
PI362	0.959315	671	0.00178571	yes	0.0480659			671	…	0.0480659					TG589NL226	0.869233	0.00099378	-0.0108976	0.0128852
SMd161241	0.960311	672	0.00185185	yes	0.0481375			672	…	0.0481375					TGO501NL150	0.219578	0.00728067	-0.00437935	0.0189407
PEP181204a	0.961007	673	0.00192308	yes	0.0482092			673	…	0.0482092					TGO501NL160	0.15629	0.00882864	-0.00340716	0.0210644
LPI181sn2	0.961078	674	0.002	yes	0.0482808			674	…	0.0482808					TGO501NL171	0.544	0.00394749	-0.00886269	0.0167577
Cerd171160	0.962351	675	0.00208333	yes	0.0483524			675	…	0.0483524					TGO501NL181	0.443192	0.00430572	-0.00674754	0.015359
TG491NL161	0.963223	676	0.00217391	yes	0.0484241			676	…	0.0484241					TGO502NL161	0.850011	-0.00110257	-0.0125883	0.0103832
LPC225n3sn1104_sn1	0.963808	677	0.00227273	yes	0.0484957			677	…	0.0484957					TGO502NL181	0.0980082	0.00984717	-0.00183465	0.021529
CE160	0.964233	678	0.00238095	yes	0.0485673			678	…	0.0485673					TGO502NL182	0.00968951	0.0171838	0.00421317	0.0301545
HexCerd161240	0.964728	679	0.0025	yes	0.048639			679	…	0.048639					TGO503NL182	0.259459	0.00758772	-0.00564559	0.020821
SMd171241	0.96738	680	0.00263158	yes	0.0487106			680	…	0.0487106					TGO520NL160	0.968537	0.00031463	-0.0154001	0.0160294
TG510NL160	0.968537	681	0.00277778	yes	0.0487822			681	…	0.0487822					TGO521NL160	0.561157	0.00393366	-0.00939565	0.017263
TGO520NL160	0.968537	682	0.00294118	yes	0.0488539			682	…	0.0488539					TGO521NL181	0.547858	0.0036188	-0.00823822	0.0154758
SM410	0.974705	683	0.003125	yes	0.0489255			683	…	0.0489255					TGO522NL160	0.931903	-0.00054815	-0.0131853	0.012089
TG546NL226	0.975507	684	0.00333333	yes	0.0489971			684	…	0.0489971					TGO522NL171	0.237798	0.007951	-0.00529306	0.0211951
SM403b	0.975618	685	0.00357143	yes	0.0490688			685	…	0.0490688					TGO522NL181	0.565903	0.00343279	-0.00834186	0.0152074
PE15MHDA_204	0.977681	686	0.00384615	yes	0.0491404			686	…	0.0491404					TGO542NL171	0.17015	0.00739714	-0.00319987	0.0179942
LPC180sn1	0.977773	687	0.00416667	yes	0.049212			687	…	0.049212					TGO542NL181	0.815101	0.00148412	-0.0110178	0.013986
PCP181181	0.981114	688	0.00454545	yes	0.0492837			688	…	0.0492837					TGO543NL171	0.376102	0.0050233	-0.0061458	0.0161924
PE180_181	0.983116	689	0.005	yes	0.0493553			689	…	0.0493553					TGO543NL181	0.472846	0.00426412	-0.00743005	0.0159583
PG361	0.983607	690	0.00555556	yes	0.0494269			690	…	0.0494269					TGO544NL171	0.535413	0.00369338	-0.00804074	0.0154275
AC170b	0.985151	691	0.00625	yes	0.0494986			691	…	0.0494986					TGO544NL182	0.0693318	0.0119613	-0.00095582	0.0248785
PEP160182	0.98824	692	0.00714286	yes	0.0495702			692	…	0.0495702					Ubiquinone	0.3671	-0.00727804	-0.0231581	0.00860199
LPC260sn1	0.989575	693	0.00833333	yes	0.0496418			693	…	0.0496418					dhCerd180160	0.722167	-0.00246764	-0.0161375	0.0112023
PCO344	0.99013	694	0.01	yes	0.0497135			694	…	0.0497135					dhCerd180180	0.518711	-0.0048476	-0.0196379	0.00994267
PE15MHDA_182	0.990972	695	0.0125	yes	0.0497851			695	…	0.0497851					dhCerd180200	0.089801	-0.0139446	-0.0300759	0.00218682
LPEP181	0.993977	696	0.0166667	yes	0.0498567			696	…	0.0498567					dhCerd180220	0.761253	-0.00280558	-0.0209944	0.0153832
PC170_181	0.994223	697	0.025	yes	0.0499284			697	…	0.0499284					dhCerd180240	0.609085	0.00411183	-0.0117231	0.0199467
LPC220sn1	0.995513	698	0.05	yes	0.05			698	…	0.05					dhCerd180241	0.842757	-0.00149862	-0.016381	0.0133837

## Sheet: FDR 0.05 lipids_v3
Lipid DV	p (sorted)	k	H-B	p > h-b	B-H (m=698)	p < b-h		k	p-values	B-H (m=698)		m	FDR		Lipid DV	p-value	B	95% LL	95% UL
TG524NL161	0.00052651	1	7.16332e-05	yes	7.16332e-05			1	lowest p-value	7.16332e-05		698	0.05		AC120	0.940658	0.00051426	-0.013102	0.0141306
TG540NL180	0.00071806	2	7.1736e-05	yes	0.000143266			2	…	0.000143266					AC130	0.704667	0.00178072	-0.00747756	0.011039
TG501NL140	0.00085552	3	7.18391e-05	yes	0.0002149			3	…	0.0002149					AC140	0.813586	-0.00158861	-0.0148666	0.0116894
TG480NL180	0.00096212	4	7.19424e-05	yes	0.000286533			4	…	0.000286533					AC141	0.526994	0.00442384	-0.0093518	0.0181995
TG521NL180	0.00104765	5	7.20461e-05	yes	0.000358166			5	…	0.000358166					AC142	0.741079	0.00254687	-0.0126433	0.017737
TG541NL181	0.00127128	6	7.21501e-05	yes	0.000429799			6	…	0.000429799					AC150a	0.24489	0.00739316	-0.00511407	0.0199004
CE182	0.00145266	7	7.22543e-05	yes	0.000501433			7	…	0.000501433					AC150b	0.348071	0.00516666	-0.00567232	0.0160056
PC181_226a	0.00158975	8	7.23589e-05	yes	0.000573066			8	…	0.000573066					AC160	0.939078	0.00048832	-0.0121052	0.0130819
TG500NL180	0.00164527	9	7.24638e-05	yes	0.000644699			9	…	0.000644699					AC161	0.270867	0.00665769	-0.00523925	0.0185546
SM442	0.00204268	10	7.25689e-05	yes	0.000716332			10	…	0.000716332					AC170a	0.860937	0.00113824	-0.011668	0.0139445
Cerd171241	0.00223723	11	7.26744e-05	yes	0.000787966			11	…	0.000787966					AC170b	0.282963	0.00682704	-0.00568472	0.0193388
GM1d181160	0.00254816	12	7.27802e-05	yes	0.000859599			12	…	0.000859599					AC180	0.794906	0.00168186	-0.0110697	0.0144334
AC181	0.00369746	13	7.28863e-05	yes	0.000931232			13	…	0.000931232					AC181	0.00369746	0.0165367	0.00544669	0.0276266
TG510NL160	0.00432061	14	7.29927e-05	yes	0.00100287			14	…	0.00100287					AC182	0.0107391	0.0153497	0.00360291	0.0270965
TGO520NL160	0.00432061	15	7.30994e-05	yes	0.0010745			15	…	0.0010745					CE140	0.572118	-0.0032844	-0.0147383	0.00816946
Hex2Cerd181160	0.00458687	16	7.32064e-05	yes	0.00114613			16	…	0.00114613					CE150	0.0501778	0.0109119	-8.559e-06	0.0218324
Cerd171160	0.00577094	17	7.33138e-05	yes	0.00121777			17	…	0.00121777					CE160	0.0828561	0.0124799	-0.00164076	0.0266006
LPEP200	0.00690938	18	7.34214e-05	yes	0.0012894			18	…	0.0012894					CE161	0.611704	-0.002664	-0.0130037	0.00767574
PC280	0.00795374	19	7.35294e-05	yes	0.00136103			19	…	0.00136103					CE162	0.991597	-6.271e-05	-0.0117981	0.0116727
DE160	0.00828142	20	7.36377e-05	yes	0.00143266			20	…	0.00143266					CE170	0.674545	0.0025115	-0.00927414	0.0142971
SMd181240	0.00885581	21	7.37463e-05	yes	0.0015043			21	…	0.0015043					CE171	0.28514	0.00580382	-0.00488107	0.0164887
SMd191241	0.00898215	22	7.38552e-05	yes	0.00157593			22	…	0.00157593					CE180	0.858325	-0.00111929	-0.0134778	0.0112392
TG483NL183	0.00939691	23	7.39645e-05	yes	0.00164756			23	…	0.00164756					CE181	0.533591	0.00403543	-0.00873418	0.016805
SM443	0.0106541	24	7.40741e-05	yes	0.0017192			24	…	0.0017192					CE182	0.00145266	0.0211127	0.00823652	0.0339889
AC182	0.0107391	25	7.4184e-05	yes	0.00179083			25	…	0.00179083					CE183	0.262654	0.00657556	-0.00497383	0.0181249
TG482NL182	0.0111206	26	7.42942e-05	yes	0.00186246			26	…	0.00186246					CE200	0.575448	0.00328264	-0.00826583	0.0148311
PC161_182	0.011706	27	7.44048e-05	yes	0.0019341			27	…	0.0019341					CE201	0.181246	0.00791643	-0.0037243	0.0195572
TG481NL181	0.0120567	28	7.45156e-05	yes	0.00200573			28	…	0.00200573					CE202	0.352033	0.00497108	-0.0055442	0.0154864
TG482NL141	0.0123896	29	7.46269e-05	yes	0.00207736			29	…	0.00207736					CE203	0.039936	0.0132837	0.00061775	0.0259497
LPC140sn1	0.0124731	30	7.47384e-05	yes	0.002149			30	…	0.002149					CE204	0.0704083	0.0112638	-0.00094832	0.0234759
GM3d181241	0.0144489	31	7.48503e-05	yes	0.00222063			31	…	0.00222063					CE205	0.472746	0.00338586	-0.00590172	0.0126734
GM3d181180	0.0148978	32	7.49625e-05	yes	0.00229226			32	…	0.00229226					CE220	0.730598	0.0019943	-0.00941965	0.0134082
SMd161241	0.0153098	33	7.50751e-05	yes	0.0023639			33	…	0.0023639					CE221	0.905256	0.00057996	-0.0090239	0.0101838
SM431	0.0163141	34	7.5188e-05	yes	0.00243553			34	…	0.00243553					CE224	0.165188	0.00797886	-0.00332102	0.0192787
TG566NL204	0.0172634	35	7.53012e-05	yes	0.00250716			35	…	0.00250716					CE225n3	0.0203945	0.0124059	0.00194446	0.0228673
PCO405	0.0176685	36	7.54148e-05	yes	0.0025788			36	…	0.0025788					CE225n6	0.331421	0.00535827	-0.00550069	0.0162172
CE245	0.0179612	37	7.55287e-05	yes	0.00265043			37	…	0.00265043					CE226	0.0378917	0.0110081	0.00062257	0.0213937
SMd171160	0.0182593	38	7.5643e-05	yes	0.00272206			38	…	0.00272206					CE240	0.051221	0.0120824	-6.481e-05	0.0242296
LPC140sn2	0.0186662	39	7.57576e-05	yes	0.0027937			39	…	0.0027937					CE241	0.0401772	0.0106606	0.00048329	0.0208379
PEP160204	0.0194369	40	7.58725e-05	yes	0.00286533			40	…	0.00286533					CE244	0.0654921	0.00946104	-0.00061318	0.0195353
CE225n3	0.0203945	41	7.59878e-05	yes	0.00293696			41	…	0.00293696					CE245	0.0179612	0.0116937	0.00203354	0.0213539
Cerd181241	0.0209316	42	7.61035e-05	yes	0.0030086			42	…	0.0030086					CE246	0.708832	0.00231024	-0.00988144	0.0145019
PC310a	0.0212309	43	7.62195e-05	yes	0.00308023			43	…	0.00308023					COH	0.22193	0.00735848	-0.00449029	0.0192073
SM383a	0.0216773	44	7.63359e-05	yes	0.00315186			44	…	0.00315186					Cer1Pd181160	0.268524	0.00723738	-0.00563209	0.0201068
Cerd191241	0.0218152	45	7.64526e-05	yes	0.0032235			45	…	0.0032235					Cerd161160	0.913675	0.00063438	-0.0109	0.0121688
Hex2Cerd161241	0.0222486	46	7.65697e-05	yes	0.00329513			46	…	0.00329513					Cerd161180	0.258511	0.00634406	-0.00470195	0.0173901
Hex2Cerd181241	0.0224651	47	7.66871e-05	yes	0.00336676			47	…	0.00336676					Cerd161200	0.691991	0.00214567	-0.00852758	0.0128189
SMd171241	0.0227601	48	7.68049e-05	yes	0.0034384			48	…	0.0034384					Cerd161220	0.0676205	0.0101124	-0.00074082	0.0209656
GM3d181160	0.0227862	49	7.69231e-05	yes	0.00351003			49	…	0.00351003					Cerd161230	0.0829298	0.00790946	-0.00104204	0.016861
TG482NL140	0.0244969	50	7.70416e-05	yes	0.00358166			50	…	0.00358166					Cerd161240	0.169801	0.00743498	-0.00321026	0.0180802
Hex2Cerd161160	0.0247337	51	7.71605e-05	yes	0.0036533			51	…	0.0036533					Cerd161241	0.236612	0.00461652	-0.00305658	0.0122896
PG362	0.0249408	52	7.72798e-05	yes	0.00372493			52	…	0.00372493					Cerd171160	0.00577094	0.0184077	0.00541085	0.0314045
Hex3Cerd181241	0.0277835	53	7.73994e-05	yes	0.00379656			53	…	0.00379656					Cerd171180	0.783363	-0.00180812	-0.0147691	0.0111529
TG501NL181	0.0278842	54	7.75194e-05	yes	0.00386819			54	…	0.00386819					Cerd171200	0.305329	0.00581164	-0.00534601	0.0169693
TG532NL171	0.0291538	55	7.76398e-05	yes	0.00393983			55	…	0.00393983					Cerd171220	0.111622	0.00946248	-0.0022173	0.0211423
Sphd161	0.0305151	56	7.77605e-05	yes	0.00401146			56	…	0.00401146					Cerd171230	0.223488	0.00615154	-0.00378736	0.0160904
TG522NL182	0.0307052	57	7.78816e-05	yes	0.00408309			57	…	0.00408309					Cerd171240	0.0857909	0.00940046	-0.00133781	0.0201387
LPCO221	0.0322339	58	7.80031e-05	yes	0.00415473			58	…	0.00415473					Cerd171241	0.00223723	0.0149016	0.00542415	0.024379
SMd181241	0.0334027	59	7.8125e-05	yes	0.00422636			59	…	0.00422636					Cerd181140	0.81084	0.00124068	-0.0089758	0.0114572
PE160_183b	0.0339224	60	7.82473e-05	yes	0.00429799			60	…	0.00429799					Cerd181160	0.20151	0.00792809	-0.00427718	0.0201334
Hex3Cerd181180	0.0356575	61	7.83699e-05	yes	0.00436963			61	…	0.00436963					Cerd181170	0.738308	-0.00223544	-0.0154217	0.0109508
PCO385	0.0358007	62	7.84929e-05	yes	0.00444126			62	…	0.00444126					Cerd181180	0.408669	0.0046671	-0.00645546	0.0157897
PC140_160	0.036248	63	7.86164e-05	yes	0.00451289			63	…	0.00451289					Cerd181190	0.582648	0.00350846	-0.00907029	0.0160872
Cerd182240	0.0365405	64	7.87402e-05	yes	0.00458453			64	…	0.00458453					Cerd181200	0.235665	0.00667172	-0.00439438	0.0177378
SM441	0.0369021	65	7.88644e-05	yes	0.00465616			65	…	0.00465616					Cerd181210	0.528621	0.00349498	-0.00743128	0.0144212
CE226	0.0378917	66	7.89889e-05	yes	0.00472779			66	…	0.00472779					Cerd181220	0.170161	0.00727102	-0.0031483	0.0176903
CE203	0.039936	67	7.91139e-05	yes	0.00479943			67	…	0.00479943					Cerd181230	0.480639	0.00385068	-0.00690308	0.0146044
PC161_226	0.0400457	68	7.92393e-05	yes	0.00487106			68	…	0.00487106					Cerd181240	0.132545	0.00749763	-0.00229483	0.0172901
LPCO242	0.0401366	69	7.93651e-05	yes	0.00494269			69	…	0.00494269					Cerd181241	0.0209316	0.0124225	0.00190193	0.0229431
CE241	0.0401772	70	7.94913e-05	yes	0.00501433			70	…	0.00501433					Cerd181260	0.26277	0.00673894	-0.00510029	0.0185782
TG511NL170	0.0427611	71	7.96178e-05	yes	0.00508596			71	…	0.00508596					Cerd182140	0.236443	0.00746085	-0.00493479	0.0198565
LPCO181	0.0433908	72	7.97448e-05	yes	0.00515759			72	…	0.00515759					Cerd182160	0.115446	0.0108441	-0.00268466	0.0243729
DE182	0.0451665	73	7.98722e-05	yes	0.00522923			73	…	0.00522923					Cerd182170	0.309188	-0.00683804	-0.0200717	0.00639565
SM403a	0.0458944	74	8e-05	yes	0.00530086			74	…	0.00530086					Cerd182180	0.824879	0.00122127	-0.00965668	0.0120992
PE180_203b	0.046683	75	8.01282e-05	yes	0.00537249			75	…	0.00537249					Cerd182210	0.610401	0.00316742	-0.00908135	0.0154162
DE205	0.0489903	76	8.02568e-05	yes	0.00544413			76	…	0.00544413					Cerd182220	0.198491	0.00725203	-0.00383741	0.0183415
S1Pd180	0.0489908	77	8.03859e-05	yes	0.00551576			77	…	0.00551576					Cerd182230	0.761691	0.0015472	-0.0085078	0.0116022
Hex2Cerd181240	0.049113	78	8.05153e-05	yes	0.00558739			78	…	0.00558739					Cerd182240	0.0365405	0.0114679	0.00072632	0.0222095
TG501NL160	0.0494141	79	8.06452e-05	yes	0.00565903			79	…	0.00565903					Cerd182241	0.25995	0.00585457	-0.00437011	0.0160793
PEP201204	0.0496329	80	8.07754e-05	yes	0.00573066			80	…	0.00573066					Cerd182260	0.621031	0.0030479	-0.00909919	0.015195
CE150	0.0501778	81	8.09061e-05	yes	0.00580229			81	…	0.00580229					Cerd191160	0.953269	-0.00036881	-0.0127734	0.0120358
CE240	0.051221	82	8.10373e-05	yes	0.00587393			82	…	0.00587393					Cerd191180	0.957594	-0.00031726	-0.0120774	0.0114429
Hex2Cerd182160	0.0514428	83	8.11688e-05	yes	0.00594556			83	…	0.00594556					Cerd191200	0.581856	0.00287029	-0.00739887	0.0131395
DE181	0.0515093	84	8.13008e-05	yes	0.00601719			84	…	0.00601719					Cerd191220	0.141622	0.00895268	-0.00301551	0.0209209
PCP180225	0.0520303	85	8.14332e-05	yes	0.00608883			85	…	0.00608883					Cerd191230	0.386846	0.00376528	-0.0048019	0.0123325
LPC201sn1	0.0530202	86	8.15661e-05	yes	0.00616046			86	…	0.00616046					Cerd191240	0.085117	0.00985872	-0.00137857	0.021096
PCP160182	0.056531	87	8.16993e-05	yes	0.00623209			87	…	0.00623209					Cerd191241	0.0218152	0.0104353	0.00153645	0.0193341
PCO407b	0.0575957	88	8.18331e-05	yes	0.00630372			88	…	0.00630372					Cerd191260	0.217408	0.00815455	-0.00484736	0.0211565
DG181_203	0.0577294	89	8.19672e-05	yes	0.00637536			89	…	0.00637536					Cerd201220	0.883118	-0.00104685	-0.0150814	0.0129877
PC170_182	0.0577871	90	8.21018e-05	yes	0.00644699			90	…	0.00644699					Cerd201230	0.646022	0.00269711	-0.00887387	0.0142681
PEP181204a	0.0589804	91	8.22368e-05	yes	0.00651862			91	…	0.00651862					Cerd201240	0.762007	0.00182863	-0.0100713	0.0137285
Hex3Cerd181240	0.0605587	92	8.23723e-05	yes	0.00659026			92	…	0.00659026					Cerd201241	0.238606	0.0068058	-0.00455399	0.0181656
TG483NL140	0.062184	93	8.25083e-05	yes	0.00666189			93	…	0.00666189					Cerd201260	0.0976383	0.0113877	-0.00210866	0.0248841
TG523NL161	0.0624535	94	8.26446e-05	yes	0.00673352			94	…	0.00673352					Cerm180200	0.212198	0.0056171	-0.00323738	0.0144716
CE244	0.0654921	95	8.27815e-05	yes	0.00680516			95	…	0.00680516					Cerm180220	0.404829	0.00396407	-0.00540588	0.013334
TGO521NL181	0.0664757	96	8.29187e-05	yes	0.00687679			96	…	0.00687679					Cerm180230	0.6341	0.00259711	-0.00815442	0.0133487
PI200_204	0.0671365	97	8.30565e-05	yes	0.00694842			97	…	0.00694842					Cerm180240	0.565718	0.00283169	-0.00688107	0.0125444
LPE226sn1	0.067209	98	8.31947e-05	yes	0.00702006			98	…	0.00702006					Cerm180241	0.249621	0.00658839	-0.00466946	0.0178462
Cerd161220	0.0676205	99	8.33333e-05	yes	0.00709169			99	…	0.00709169					Cerm181180	0.704618	-0.00233915	-0.0144987	0.00982039
SMd161230SMd171220	0.0695804	100	8.34725e-05	yes	0.00716332			100	…	0.00716332					Cerm181200	0.297585	0.00524352	-0.00466292	0.01515
SM432c	0.0700628	101	8.3612e-05	yes	0.00723496			101	…	0.00723496					Cerm181220	0.399924	0.00423341	-0.00566921	0.014136
CE204	0.0704083	102	8.37521e-05	yes	0.00730659			102	…	0.00730659					Cerm181230	0.280774	0.00557742	-0.00459765	0.0157525
PI160160	0.0704097	103	8.38926e-05	yes	0.00737822			103	…	0.00737822					Cerm181240	0.426286	0.00416037	-0.00613762	0.0144584
Hex3Cerd181160	0.0706417	104	8.40336e-05	yes	0.00744986			104	…	0.00744986					Cerm181241	0.41086	0.00502743	-0.00701017	0.017065
S1Pd182	0.0714925	105	8.41751e-05	yes	0.00752149			105	…	0.00752149					DE160	0.00828142	0.018654	0.00487074	0.0324372
TG480NL160	0.0722091	106	8.4317e-05	yes	0.00759312			106	…	0.00759312					DE181	0.0515093	0.0132806	-8.795e-05	0.0266492
TG542NL180	0.0722104	107	8.44595e-05	yes	0.00766476			107	…	0.00766476					DE182	0.0451665	0.0142763	0.00031095	0.0282417
LPC171sn1b	0.0729185	108	8.46024e-05	yes	0.00773639			108	…	0.00773639					DE204	0.172413	0.00957795	-0.00421996	0.0233759
PCO180204	0.0730791	109	8.47458e-05	yes	0.00780802			109	…	0.00780802					DE205	0.0489903	0.0132943	5.95e-05	0.026529
PCO407a	0.0736901	110	8.48896e-05	yes	0.00787966			110	…	0.00787966					DE226	0.138482	0.00980511	-0.00319835	0.0228086
SM372	0.07406	111	8.5034e-05	yes	0.00795129			111	…	0.00795129					DG140_160	0.0779408	-0.00936497	-0.0197889	0.00105892
S1Pd161	0.074378	112	8.51789e-05	yes	0.00802292			112	…	0.00802292					DG140_182	0.66174	-0.00227505	-0.0125215	0.00797146
LPC170sn1	0.0752741	113	8.53242e-05	yes	0.00809456			113	…	0.00809456					DG160_160	0.530688	-0.00326005	-0.0135032	0.00698313
SMd181200SMd161220	0.0758462	114	8.54701e-05	yes	0.00816619			114	…	0.00816619					DG160_161	0.893636	-0.00065797	-0.0103575	0.0090415
TG503NL183	0.0761094	115	8.56164e-05	yes	0.00823782			115	…	0.00823782					DG160_181	0.649684	-0.00266712	-0.0142378	0.00890361
PCO341	0.0768623	116	8.57633e-05	yes	0.00830946			116	…	0.00830946					DG160_182	0.828771	0.00129687	-0.0105214	0.0131151
PC181_182	0.0770066	117	8.59107e-05	yes	0.00838109			117	…	0.00838109					DG160_204	0.526361	0.00369642	-0.00779645	0.0151893
DG140_160	0.0779408	118	8.60585e-05	yes	0.00845272			118	…	0.00845272					DG160_225	0.866633	0.00080372	-0.008629	0.0102364
LPCO200	0.0783254	119	8.62069e-05	yes	0.00852436			119	…	0.00852436					DG160_226	0.866736	0.00085562	-0.00919407	0.0109053
LPCO201	0.0809562	120	8.63558e-05	yes	0.00859599			120	…	0.00859599					DG161_181	0.32204	0.00516485	-0.00510053	0.0154302
SMd182181	0.0814803	121	8.65052e-05	yes	0.00866762			121	…	0.00866762					DG180_181	0.2417	-0.00721361	-0.0193339	0.00490671
PS405	0.0818256	122	8.66551e-05	yes	0.00873926			122	…	0.00873926					DG180_182	0.411769	-0.00491599	-0.0167097	0.00687771
Sulfatided181160	0.0826525	123	8.68056e-05	yes	0.00881089			123	…	0.00881089					DG180_204	0.272657	0.00674716	-0.00535493	0.0188493
SMd161190	0.0828404	124	8.69565e-05	yes	0.00888252			124	…	0.00888252					DG181_181	0.427717	0.00496746	-0.00736646	0.0173014
CE160	0.0828561	125	8.7108e-05	yes	0.00895415			125	…	0.00895415					DG181_182	0.162377	0.00933553	-0.0037973	0.0224684
Cerd161230	0.0829298	126	8.726e-05	yes	0.00902579			126	…	0.00902579					DG181_183	0.867842	-0.00120494	-0.0154777	0.0130678
Cerd191240	0.085117	127	8.74126e-05	yes	0.00909742			127	…	0.00909742					DG181_203	0.0577294	0.00973718	-0.00032278	0.0197971
Cerd171240	0.0857909	128	8.75657e-05	yes	0.00916905			128	…	0.00916905					DG181_204	0.116491	0.00956683	-0.00240297	0.0215366
PI180_204	0.0858037	129	8.77193e-05	yes	0.00924069			129	…	0.00924069					DG181_205	0.563348	0.00309865	-0.00746554	0.0136628
PEO385b	0.0871785	130	8.78735e-05	yes	0.00931232			130	…	0.00931232					DG182_182	0.504523	0.00396739	-0.00774213	0.0156769
TG524NL182	0.0884123	131	8.80282e-05	yes	0.00938395			131	…	0.00938395					DG182_204	0.394721	0.00525914	-0.00690768	0.017426
TG504NL183	0.0894467	132	8.81834e-05	yes	0.00945559			132	…	0.00945559					DG182_226	0.175871	0.00565876	-0.00255929	0.0138768
HexCerd182200	0.0907655	133	8.83392e-05	yes	0.00952722			133	…	0.00952722					GM1d181160	0.00254816	0.0198757	0.00706589	0.0326855
SMd182220	0.0911195	134	8.84956e-05	yes	0.00959885			134	…	0.00959885					GM3d181160	0.0227862	0.0136349	0.00192163	0.0253481
PEP180204	0.0923234	135	8.86525e-05	yes	0.00967049			135	…	0.00967049					GM3d181180	0.0148978	0.0138222	0.00273	0.0249144
SMd181170SMd171180	0.0924106	136	8.88099e-05	yes	0.00974212			136	…	0.00974212					GM3d181200	0.288002	0.00615582	-0.00524483	0.0175565
TG543NL181	0.0929387	137	8.8968e-05	yes	0.00981375			137	…	0.00981375					GM3d181220	0.131251	0.0077143	-0.00232723	0.0177558
LPCO220	0.0950368	138	8.91266e-05	yes	0.00988539			138	…	0.00988539					GM3d181240	0.688651	0.00199388	-0.00781207	0.0117998
HexCerd181241	0.0955113	139	8.92857e-05	yes	0.00995702			139	…	0.00995702					GM3d181241	0.0144489	0.013139	0.00264355	0.0236345
PCP170204a	0.0975176	140	8.94454e-05	yes	0.0100287			140	…	0.0100287					Hex2Cerd161160	0.0247337	0.0107408	0.0013825	0.0200991
Cerd201260	0.0976383	141	8.96057e-05	yes	0.0101003			141	…	0.0101003					Hex2Cerd161241	0.0222486	0.0126029	0.00181992	0.0233859
SMd182200	0.0977942	142	8.97666e-05	yes	0.0101719			142	…	0.0101719					Hex2Cerd181160	0.00458687	0.015949	0.00498955	0.0269085
PC15MHDA_204	0.0979145	143	8.99281e-05	yes	0.0102436			143	…	0.0102436					Hex2Cerd181180	0.312912	0.00697871	-0.00663187	0.0205893
PI160_203b	0.0979536	144	9.00901e-05	yes	0.0103152			144	…	0.0103152					Hex2Cerd181200	0.89182	-0.00089487	-0.0138637	0.012074
Hex3Cerd181220	0.100515	145	9.02527e-05	yes	0.0103868			145	…	0.0103868					Hex2Cerd181220	0.316839	0.00569367	-0.00550144	0.0168888
PC15MHDA_226	0.101412	146	9.04159e-05	yes	0.0104585			146	…	0.0104585					Hex2Cerd181240	0.049113	0.0112174	4.408e-05	0.0223907
PS361	0.102538	147	9.05797e-05	yes	0.0105301			147	…	0.0105301					Hex2Cerd181241	0.0224651	0.0125517	0.00179492	0.0233084
SMd181220SMd161240	0.103206	148	9.07441e-05	yes	0.0106017			148	…	0.0106017					Hex2Cerd182160	0.0514428	0.00951074	-6.022e-05	0.0190817
PC160_204	0.103291	149	9.09091e-05	yes	0.0106734			149	…	0.0106734					Hex2Cerd182241	0.587916	0.00270581	-0.00713253	0.0125442
PC160_226	0.103984	150	9.10747e-05	yes	0.010745			150	…	0.010745					Hex3Cerd181160	0.0706417	0.0114509	-0.00097448	0.0238763
SM411a	0.107434	151	9.12409e-05	yes	0.0108166			151	…	0.0108166					Hex3Cerd181180	0.0356575	0.0141733	0.00096137	0.0273853
LPCO241	0.110663	152	9.14077e-05	yes	0.0108883			152	…	0.0108883					Hex3Cerd181200	0.499062	0.00442459	-0.00846844	0.0173176
Cerd171220	0.111622	153	9.15751e-05	yes	0.0109599			153	…	0.0109599					Hex3Cerd181220	0.100515	0.0101663	-0.00198639	0.022319
PCO160204	0.112879	154	9.17431e-05	yes	0.0110315			154	…	0.0110315					Hex3Cerd181240	0.0605587	0.0115449	-0.00051786	0.0236077
SM371	0.113593	155	9.19118e-05	yes	0.0111032			155	…	0.0111032					Hex3Cerd181241	0.0277835	0.0145272	0.00160599	0.0274484
LPCP200	0.11405	156	9.2081e-05	yes	0.0111748			156	…	0.0111748					HexCerd161180	0.750931	0.00181806	-0.00946999	0.0131061
PC180_181	0.114077	157	9.22509e-05	yes	0.0112464			157	…	0.0112464					HexCerd161200	0.989769	6.863e-05	-0.0104819	0.0106191
TGO543NL181	0.114163	158	9.24214e-05	yes	0.0113181			158	…	0.0113181					HexCerd161220	0.950474	-0.00033902	-0.0110974	0.0104193
TGO521NL160	0.114778	159	9.25926e-05	yes	0.0113897			159	…	0.0113897					HexCerd161240	0.600752	0.00248361	-0.00686699	0.0118342
Cerd182160	0.115446	160	9.27644e-05	yes	0.0114613			160	…	0.0114613					HexCerd181160	0.395579	0.00472654	-0.00622805	0.0156811
DG181_204	0.116491	161	9.29368e-05	yes	0.011533			161	…	0.011533					HexCerd181180	0.881023	-0.00083485	-0.0118287	0.010159
SMd182240	0.116583	162	9.31099e-05	yes	0.0116046			162	…	0.0116046					HexCerd181200	0.863341	-0.00075919	-0.00945322	0.00793484
LPC201sn2	0.11792	163	9.32836e-05	yes	0.0116762			163	…	0.0116762					HexCerd181220	0.276968	0.00555861	-0.0045019	0.0156191
SMd181140SMd161160	0.118154	164	9.34579e-05	yes	0.0117479			164	…	0.0117479					HexCerd181240	0.98662	-8.562e-05	-0.0101484	0.00997713
PC170_226	0.12064	165	9.3633e-05	yes	0.0118195			165	…	0.0118195					HexCerd181241	0.0955113	0.00754455	-0.00133969	0.0164288
PI180_202	0.120945	166	9.38086e-05	yes	0.0118911			166	…	0.0118911					HexCerd182180	0.971574	0.0002222	-0.0120684	0.0125128
Sulfatided181240	0.121589	167	9.3985e-05	yes	0.0119628			167	…	0.0119628					HexCerd182200	0.0907655	-0.0108257	-0.0233886	0.00173722
PE180_181	0.123239	168	9.4162e-05	yes	0.0120344			168	…	0.0120344					HexCerd182220	0.591317	0.00303543	-0.00810283	0.0141737
PCO160160	0.123921	169	9.43396e-05	yes	0.012106			169	…	0.012106					HexCerd182240	0.43921	0.00449374	-0.00694687	0.0159343
SMd182170	0.124648	170	9.4518e-05	yes	0.0121777			170	…	0.0121777					LPC140sn1	0.0124731	-0.014044	-0.0250222	-0.00306586
PCP160204	0.124801	171	9.4697e-05	yes	0.0122493			171	…	0.0122493					LPC140sn2	0.0186662	-0.0130899	-0.0239702	-0.00220958
LPCO160	0.127848	172	9.48767e-05	yes	0.0123209			172	…	0.0123209					LPC150sn1	0.926057	0.00051648	-0.0104525	0.0114855
S1Pd181	0.128154	173	9.5057e-05	yes	0.0123926			173	…	0.0123926					LPC150sn2	0.552384	-0.00339245	-0.0146401	0.00785516
PCP385a	0.129021	174	9.52381e-05	yes	0.0124642			174	…	0.0124642					LPC15MHDAsn1104_sn1	0.639425	0.00268475	-0.00860669	0.0139762
PCO181181	0.129358	175	9.54198e-05	yes	0.0125358			175	…	0.0125358					LPC15MHDAsn1LPC170	0.375976	0.00528034	-0.00646195	0.0170226
TG502NL140	0.129621	176	9.56023e-05	yes	0.0126074			176	…	0.0126074					LPC15MHDAsn2	0.661431	0.00236258	-0.00826781	0.012993
GM3d181220	0.131251	177	9.57854e-05	yes	0.0126791			177	…	0.0126791					LPC160sn1	0.139732	0.00933676	-0.00308506	0.0217586
LPC183sn1b	0.132518	178	9.59693e-05	yes	0.0127507			178	…	0.0127507					LPC160sn2	0.267245	0.00705482	-0.00545641	0.0195661
Cerd181240	0.132545	179	9.61538e-05	yes	0.0128223			179	…	0.0128223					LPC161sn1	0.583586	-0.00305031	-0.0140138	0.00791315
PE180_225n6	0.132666	180	9.63391e-05	yes	0.012894			180	…	0.012894					LPC161sn2	0.366374	-0.0045169	-0.0143614	0.00532759
PE160_203	0.134515	181	9.65251e-05	yes	0.0129656			181	…	0.0129656					LPC170sn1	0.0752741	0.01132	-0.00116539	0.0238053
PC161_204	0.135042	182	9.67118e-05	yes	0.0130372			182	…	0.0130372					LPC171asn1104_sn1	0.470622	-0.00402106	-0.0149982	0.00695611
PC200_204	0.135301	183	9.68992e-05	yes	0.0131089			183	…	0.0131089					LPC171sn1aLPC171	0.650234	-0.00267325	-0.0142901	0.00894362
PEO180225	0.136048	184	9.70874e-05	yes	0.0131805			184	…	0.0131805					LPC171sn1b	0.0729185	-0.00929869	-0.0194707	0.00087337
DE226	0.138482	185	9.72763e-05	yes	0.0132521			185	…	0.0132521					LPC171sn2a	0.617312	-0.00298938	-0.0147774	0.00879868
PCP200204	0.138657	186	9.74659e-05	yes	0.0133238			186	…	0.0133238					LPC180sn1	0.540087	0.00383939	-0.00850549	0.0161843
TG491NL161	0.139108	187	9.76563e-05	yes	0.0133954			187	…	0.0133954					LPC180sn2	0.537093	0.00378997	-0.00830639	0.0158863
LPC160sn1	0.139732	188	9.78474e-05	yes	0.013467			188	…	0.013467					LPC181sn1	0.741986	0.00195717	-0.00975848	0.0136728
PC180_204	0.140824	189	9.80392e-05	yes	0.0135387			189	…	0.0135387					LPC181sn2	0.567193	-0.00356106	-0.0158221	0.0087
Cerd191220	0.141622	190	9.82318e-05	yes	0.0136103			190	…	0.0136103					LPC182sn1	0.658084	0.00295715	-0.0102095	0.0161238
TG546NL226	0.141789	191	9.84252e-05	yes	0.0136819			191	…	0.0136819					LPC182sn2	0.672974	0.00291824	-0.0107063	0.0165428
PC330a	0.142295	192	9.86193e-05	yes	0.0137536			192	…	0.0137536					LPC183asn1104_sn1	0.322824	-0.00673567	-0.0201449	0.00667356
TG503NL141	0.142667	193	9.88142e-05	yes	0.0138252			193	…	0.0138252					LPC183sn1aLPC183s	0.213329	-0.0090175	-0.0232675	0.00523252
PS406	0.143196	194	9.90099e-05	yes	0.0138968			194	…	0.0138968					LPC183sn1b	0.132518	-0.0105513	-0.024331	0.0032285
PE160_205	0.145143	195	9.92063e-05	yes	0.0139685			195	…	0.0139685					LPC183sn2a	0.155692	-0.0102268	-0.0243833	0.00392965
PEP150204b	0.147579	196	9.94036e-05	yes	0.0140401			196	…	0.0140401					LPC190asn1104_sn1	0.734193	-0.00188913	-0.0128541	0.00907583
SMd171140	0.148796	197	9.96016e-05	yes	0.0141117			197	…	0.0141117					LPC190sn1aLPC190	0.357364	0.00625754	-0.00712643	0.0196415
SM403b	0.149594	198	9.98004e-05	yes	0.0141834			198	…	0.0141834					LPC190sn1b	0.289329	0.0072961	-0.00625372	0.0208459
LPC200sn2	0.152158	199	0.0001	yes	0.014255			199	…	0.014255					LPC190sn2a	0.823115	-0.0013426	-0.0131804	0.0104952
PEP170204a	0.154159	200	0.0001002	yes	0.0143266			200	…	0.0143266					LPC191a	0.327677	-0.00586274	-0.0176525	0.00592698
LPC183sn2a	0.155692	201	0.000100402	yes	0.0143983			201	…	0.0143983					LPC191b	0.592899	-0.00319664	-0.0149771	0.00858381
PC180_226	0.156838	202	0.000100604	yes	0.0144699			202	…	0.0144699					LPC191c	0.772581	-0.0014678	-0.0114786	0.00854304
PEP160182	0.159203	203	0.000100806	yes	0.0145415			203	…	0.0145415					LPC200sn1	0.212742	0.00732263	-0.00423436	0.0188796
DG181_182	0.162377	204	0.00010101	yes	0.0146132			204	…	0.0146132					LPC200sn2	0.152158	0.00811737	-0.00302265	0.0192574
LPC260sn2	0.16298	205	0.000101215	yes	0.0146848			205	…	0.0146848					LPC201sn1	0.0530202	0.0120286	-0.00015848	0.0242156
CE224	0.165188	206	0.00010142	yes	0.0147564			206	…	0.0147564					LPC201sn2	0.11792	0.00812162	-0.00208007	0.0183233
LPC220sn2	0.168414	207	0.000101626	yes	0.0148281			207	…	0.0148281					LPC202sn1	0.766015	0.00194084	-0.0109123	0.014794
PEP200181	0.168566	208	0.000101833	yes	0.0148997			208	…	0.0148997					LPC202sn2	0.725393	0.00231327	-0.010665	0.0152915
Cerd161240	0.169801	209	0.000102041	yes	0.0149713			209	…	0.0149713					LPC203sn1	0.741725	-0.00216754	-0.0151288	0.0107937
PI160_161	0.170045	210	0.000102249	yes	0.015043			210	…	0.015043					LPC203sn2	0.842191	-0.00130898	-0.0142674	0.0116494
Cerd181220	0.170161	211	0.000102459	yes	0.0151146			211	…	0.0151146					LPC204sn1	0.679732	0.00282813	-0.0106714	0.0163276
PCP160160	0.171575	212	0.000102669	yes	0.0151862			212	…	0.0151862					LPC204sn2	0.772739	0.00200638	-0.0116857	0.0156985
PEO160203	0.172228	213	0.000102881	yes	0.0152579			213	…	0.0152579					LPC205sn1	0.632635	-0.00267372	-0.0136947	0.00834726
DE204	0.172413	214	0.000103093	yes	0.0153295			214	…	0.0153295					LPC205sn2	0.679024	-0.00230204	-0.0132647	0.00866062
PEP200204	0.172585	215	0.000103306	yes	0.0154011			215	…	0.0154011					LPC220sn1	0.339947	0.00657119	-0.00698389	0.0201263
PI15MHDA_181PI170_181	0.174536	216	0.00010352	yes	0.0154728			216	…	0.0154728					LPC220sn2	0.168414	0.00915322	-0.00390957	0.022216
DG182_226	0.175871	217	0.000103734	yes	0.0155444			217	…	0.0155444					LPC221sn1	0.394539	0.00415426	-0.00545302	0.0137615
SMd181160	0.178524	218	0.00010395	yes	0.015616			218	…	0.015616					LPC221sn2	0.610466	0.00260834	-0.00748056	0.0126972
PC15MHDA_182	0.179545	219	0.000104167	yes	0.0156877			219	…	0.0156877					LPC224sn1	0.240002	-0.00672227	-0.0179762	0.00453165
CE201	0.181246	220	0.000104384	yes	0.0157593			220	…	0.0157593					LPC224sn2	0.438206	-0.00416305	-0.0147385	0.00641238
PC332	0.183839	221	0.000104603	yes	0.0158309			221	…	0.0158309					LPC225n3sn1104_sn1	0.706924	-0.00236611	-0.0147674	0.0100351
dhCerd180200	0.187993	222	0.000104822	yes	0.0159026			222	…	0.0159026					LPC225sn1n3LPC225	0.441564	-0.00476384	-0.0169548	0.00742712
PE385b	0.194909	223	0.000105042	yes	0.0159742			223	…	0.0159742					LPC225sn1n6	0.757596	-0.00163221	-0.0120544	0.00879002
TG504NL140	0.195015	224	0.000105263	yes	0.0160458			224	…	0.0160458					LPC225sn2n3	0.475825	-0.00448155	-0.0168607	0.00789763
TG588NL226	0.195374	225	0.000105485	yes	0.0161175			225	…	0.0161175					LPC226sn1	0.398196	0.00515122	-0.00685413	0.0171566
PC171_182	0.195378	226	0.000105708	yes	0.0161891			226	…	0.0161891					LPC226sn2	0.536302	0.00395403	-0.00864143	0.0165495
PC160_183b	0.195851	227	0.000105932	yes	0.0162607			227	…	0.0162607					LPC240sn1	0.90879	0.00070297	-0.0113911	0.0127971
PE170_181	0.196626	228	0.000106157	yes	0.0163324			228	…	0.0163324					LPC240sn2	0.65545	0.00281371	-0.00961188	0.0152393
SMd180160	0.197988	229	0.000106383	yes	0.016404			229	…	0.016404					LPC260sn1	0.643052	0.0026036	-0.00846671	0.0136739
Cerd182220	0.198491	230	0.00010661	yes	0.0164756			230	…	0.0164756					LPC260sn2	0.16298	0.00883859	-0.00361314	0.0212903
PE180_182	0.199032	231	0.000106838	yes	0.0165473			231	…	0.0165473					LPCO160	0.127848	0.00881343	-0.00255675	0.0201836
PEP170204b	0.199092	232	0.000107066	yes	0.0166189			232	…	0.0166189					LPCO180	0.305673	0.00518534	-0.00477699	0.0151477
Cerd181160	0.20151	233	0.000107296	yes	0.0166905			233	…	0.0166905					LPCO181	0.0433908	0.011758	0.00035306	0.023163
PE160_161	0.204289	234	0.000107527	yes	0.0167622			234	…	0.0167622					LPCO200	0.0783254	0.00882797	-0.00101101	0.018667
PE160_181	0.205133	235	0.000107759	yes	0.0168338			235	…	0.0168338					LPCO201	0.0809562	0.00920993	-0.00114569	0.0195655
TGO501NL181	0.205992	236	0.000107991	yes	0.0169054			236	…	0.0169054					LPCO220	0.0950368	0.00984825	-0.00173201	0.0214285
PCO360	0.207026	237	0.000108225	yes	0.0169771			237	…	0.0169771					LPCO221	0.0322339	0.0138572	0.00118855	0.0265258
PCO181182	0.207364	238	0.00010846	yes	0.0170487			238	…	0.0170487					LPCO240	0.441795	0.00453002	-0.00706847	0.0161285
TG491NL171	0.209609	239	0.000108696	yes	0.0171203			239	…	0.0171203					LPCO241	0.110663	0.0108095	-0.00249692	0.024116
SM432b	0.209772	240	0.000108932	yes	0.017192			240	…	0.017192					LPCO242	0.0401366	0.0128641	0.00058571	0.0251424
PC387c	0.210397	241	0.00010917	yes	0.0172636			241	…	0.0172636					LPCP160	0.385609	0.00579233	-0.0073523	0.018937
PEP190204b	0.211112	242	0.000109409	yes	0.0173352			242	…	0.0173352					LPCP170a	0.837597	-0.00106286	-0.0112838	0.00915808
SM383b	0.212164	243	0.000109649	yes	0.0174069			243	…	0.0174069					LPCP170b	0.672308	0.00250942	-0.00918184	0.0142007
Cerm180200	0.212198	244	0.00010989	yes	0.0174785			244	…	0.0174785					LPCP180	0.609983	0.00340732	-0.00975375	0.0165684
LPC200sn1	0.212742	245	0.000110132	yes	0.0175501			245	…	0.0175501					LPCP181	0.375593	0.00574031	-0.00701529	0.0184959
LPC183sn1aLPC183s	0.213329	246	0.000110375	yes	0.0176218			246	…	0.0176218					LPCP200	0.11405	0.0115808	-0.00281113	0.0259727
PC150_226	0.216795	247	0.000110619	yes	0.0176934			247	…	0.0176934					LPE160sn1	0.886213	0.00094914	-0.0121241	0.0140223
PEP181225b	0.217383	248	0.000110865	yes	0.017765			248	…	0.017765					LPE160sn2	0.752584	-0.00207231	-0.0150278	0.0108832
Cerd191260	0.217408	249	0.000111111	yes	0.0178367			249	…	0.0178367					LPE170sn1	0.830267	0.00139071	-0.0113961	0.0141775
PS383	0.220181	250	0.000111359	yes	0.0179083			250	…	0.0179083					LPE170sn2	0.566936	-0.0038995	-0.0173169	0.00951792
PS362	0.221077	251	0.000111607	yes	0.0179799			251	…	0.0179799					LPE180sn1	0.858879	-0.00120068	-0.0145104	0.0121091
COH	0.22193	252	0.000111857	yes	0.0180516			252	…	0.0180516					LPE180sn2	0.665835	-0.00283151	-0.0157509	0.0100879
Cerd171230	0.223488	253	0.000112108	yes	0.0181232			253	…	0.0181232					LPE181sn1	0.967504	0.00027194	-0.0128851	0.013429
PEP200182	0.224176	254	0.00011236	yes	0.0181948			254	…	0.0181948					LPE181sn2	0.920081	-0.00069291	-0.0143052	0.0129194
PE160_183a	0.225423	255	0.000112613	yes	0.0182665			255	…	0.0182665					LPE182sn1	0.641242	-0.00302781	-0.0158315	0.00977592
TGO544NL182	0.226101	256	0.000112867	yes	0.0183381			256	…	0.0183381					LPE182sn2	0.572127	-0.00381769	-0.0171317	0.00949628
PC160_203b	0.227598	257	0.000113122	yes	0.0184097			257	…	0.0184097					LPE204sn1	0.615364	-0.00319237	-0.0157123	0.00932752
TG503NL161	0.228941	258	0.000113379	yes	0.0184814			258	…	0.0184814					LPE204sn2	0.860006	0.00111265	-0.0113217	0.013547
PI341	0.229623	259	0.000113636	yes	0.018553			259	…	0.018553					LPE226sn1	0.067209	0.0115583	-0.00082795	0.0239446
PCP180226	0.229663	260	0.000113895	yes	0.0186246			260	…	0.0186246					LPE226sn2	0.23923	0.00733379	-0.00492363	0.0195912
PS385	0.231214	261	0.000114155	yes	0.0186963			261	…	0.0186963					LPEP160	0.659128	0.00266454	-0.00923808	0.0145672
PC385a	0.231717	262	0.000114416	yes	0.0187679			262	…	0.0187679					LPEP180	0.297055	0.00545405	-0.00483881	0.0157469
PEP181182a	0.235601	263	0.000114679	yes	0.0188395			263	…	0.0188395					LPEP181	0.671071	0.00245259	-0.00892755	0.0138327
Cerd181200	0.235665	264	0.000114943	yes	0.0189112			264	…	0.0189112					LPEP200	0.00690938	0.0160522	0.00446395	0.0276405
Cerd182140	0.236443	265	0.000115207	yes	0.0189828			265	…	0.0189828					LPI180sn1	0.535469	-0.00439873	-0.0183822	0.0095847
Cerd161241	0.236612	266	0.000115473	yes	0.0190544			266	…	0.0190544					LPI180sn2	0.829624	0.0015245	-0.0124387	0.0154877
SMd182180	0.237751	267	0.000115741	yes	0.0191261			267	…	0.0191261					LPI181sn1	0.447785	-0.0063072	-0.0226701	0.0100557
Cerd201241	0.238606	268	0.000116009	yes	0.0191977			268	…	0.0191977					LPI181sn2	0.9409	0.00054318	-0.0138977	0.014984
PEP181183	0.238874	269	0.000116279	yes	0.0192693			269	…	0.0192693					LPI182sn1	0.479916	-0.00446734	-0.0169227	0.00798797
LPE226sn2	0.23923	270	0.00011655	yes	0.019341			270	…	0.019341					LPI182sn2	0.773868	-0.00179837	-0.014134	0.0105372
LPC224sn1	0.240002	271	0.000116822	yes	0.0194126			271	…	0.0194126					LPI204sn1	0.412199	-0.00606864	-0.0206411	0.00850378
PC360	0.240816	272	0.000117096	yes	0.0194842			272	…	0.0194842					LPI204sn2	0.539931	-0.0041586	-0.0175247	0.00920747
DG180_181	0.2417	273	0.000117371	yes	0.0195559			273	…	0.0195559					PC140_160	0.036248	-0.0112896	-0.0218474	-0.00073178
SMd181230SMd171240	0.242905	274	0.000117647	yes	0.0196275			274	…	0.0196275					PC140_204	0.612541	-0.00268816	-0.0131463	0.00776996
AC150a	0.24489	275	0.000117925	yes	0.0196991			275	…	0.0196991					PC140_226	0.85095	-0.00093492	-0.0107412	0.0088714
PC180_224	0.246668	276	0.000118203	yes	0.0197708			276	…	0.0197708					PC150_203	0.685015	0.00247195	-0.00953693	0.0144808
PC331	0.246966	277	0.000118483	yes	0.0198424			277	…	0.0198424					PC150_204	0.488693	0.00355044	-0.00654964	0.0136505
PEP160181	0.247191	278	0.000118765	yes	0.019914			278	…	0.019914					PC150_226	0.216795	0.0061331	-0.00363265	0.0158988
Cerm180241	0.249621	279	0.000119048	yes	0.0199857			279	…	0.0199857					PC15MHDA_181	0.452408	-0.00419974	-0.0152071	0.00680768
TG589NL226	0.254068	280	0.000119332	yes	0.0200573			280	…	0.0200573					PC15MHDA_182	0.179545	0.00832427	-0.00386823	0.0205168
PE180_203a	0.25414	281	0.000119617	yes	0.0201289			281	…	0.0201289					PC15MHDA_204	0.0979145	0.00930566	-0.00173228	0.0203436
PCP160226	0.256999	282	0.000119904	yes	0.0202006			282	…	0.0202006					PC15MHDA_226	0.101412	0.00806487	-0.00160139	0.0177311
Cerd161180	0.258511	283	0.000120192	yes	0.0202722			283	…	0.0202722					PC160_160	0.850234	0.00116715	-0.0110158	0.0133501
Cerd182241	0.25995	284	0.000120482	yes	0.0203438			284	…	0.0203438					PC160_180	0.911984	-0.00073207	-0.0137859	0.0123217
PC384b	0.260412	285	0.000120773	yes	0.0204155			285	…	0.0204155					PC160_181	0.916467	0.00070098	-0.012472	0.0138739
PC170_204	0.260863	286	0.000121065	yes	0.0204871			286	…	0.0204871					PC160_182	0.28444	0.00775549	-0.00650163	0.0220126
PEP201226	0.26164	287	0.000121359	yes	0.0205587			287	…	0.0205587					PC160_183a	0.730286	-0.00215318	-0.0144617	0.0101553
CE183	0.262654	288	0.000121655	yes	0.0206304			288	…	0.0206304					PC160_183b	0.195851	-0.00755352	-0.0190358	0.00392875
Cerd181260	0.26277	289	0.000121951	yes	0.020702			289	…	0.020702					PC160_203a	0.927635	0.00058835	-0.0121802	0.0133569
TG568NL226	0.263453	290	0.000122249	yes	0.0207736			290	…	0.0207736					PC160_203b	0.227598	-0.00638623	-0.0167965	0.00402406
PEP181226a	0.263754	291	0.000122549	yes	0.0208453			291	…	0.0208453					PC160_204	0.103291	0.0105921	-0.00217347	0.0233577
LPC160sn2	0.267245	292	0.00012285	yes	0.0209169			292	…	0.0209169					PC160_205	0.950377	-0.00030366	-0.00992098	0.00931367
Cer1Pd181160	0.268524	293	0.000123153	yes	0.0209885			293	…	0.0209885					PC160_226	0.103984	0.0110025	-0.00228452	0.0242896
AC161	0.270867	294	0.000123457	yes	0.0210602			294	…	0.0210602					PC161_182	0.011706	0.0150056	0.00338201	0.0266293
PC4412	0.27118	295	0.000123762	yes	0.0211318			295	…	0.0211318					PC161_204	0.135042	0.00825002	-0.00259501	0.019095
TG483NL161	0.272284	296	0.000124069	yes	0.0212034			296	…	0.0212034					PC161_226	0.0400457	0.011088	0.00050974	0.0216662
DG180_204	0.272657	297	0.000124378	yes	0.0212751			297	…	0.0212751					PC170_181	0.740669	-0.00216489	-0.0150556	0.0107258
PE180_224	0.272946	298	0.000124688	yes	0.0213467			298	…	0.0213467					PC170_182	0.0577871	0.0123771	-0.00041327	0.0251675
Sulfatided181241	0.275106	299	0.000125	yes	0.0214183			299	…	0.0214183					PC170_204	0.260863	0.00697326	-0.00522859	0.0191751
PEO160226	0.276468	300	0.000125313	yes	0.02149			300	…	0.02149					PC170_226	0.12064	0.00881961	-0.00234115	0.0199804
PCP160161	0.276557	301	0.000125628	yes	0.0215616			301	…	0.0215616					PC171_182	0.195378	0.00809799	-0.00419884	0.0203948
TGO501NL150	0.276967	302	0.000125945	yes	0.0216332			302	…	0.0216332					PC180_181	0.114077	-0.00953714	-0.0213902	0.00231595
HexCerd181220	0.276968	303	0.000126263	yes	0.0217049			303	…	0.0217049					PC180_182	0.761174	0.00218419	-0.0119784	0.0163468
PC321	0.277139	304	0.000126582	yes	0.0217765			304	…	0.0217765					PC180_203	0.58902	-0.00304807	-0.0141637	0.00806761
Cerm181230	0.280774	305	0.000126904	yes	0.0218481			305	…	0.0218481					PC180_204	0.140824	0.00851885	-0.00284626	0.019884
AC170b	0.282963	306	0.000127226	yes	0.0219198			306	…	0.0219198					PC180_224	0.246668	-0.00520021	-0.0140305	0.00363007
PC160_182	0.28444	307	0.000127551	yes	0.0219914			307	…	0.0219914					PC180_225n3PC201_204	0.454956	-0.004406	-0.0160195	0.0072075
CE171	0.28514	308	0.000127877	yes	0.022063			308	…	0.022063					PC180_225n6	0.539697	0.0032411	-0.00717004	0.0136522
TG567NL226	0.285217	309	0.000128205	yes	0.0221347			309	…	0.0221347					PC180_226	0.156838	0.00798154	-0.00309768	0.0190608
PE180_225n3	0.285561	310	0.000128535	yes	0.0222063			310	…	0.0222063					PC181_181	0.970742	-0.00022279	-0.0121954	0.0117498
PE15MHDA_204	0.286646	311	0.000128866	yes	0.0222779			311	…	0.0222779					PC181_182	0.0770066	0.0124201	-0.00136048	0.0262007
PCO321	0.286895	312	0.000129199	yes	0.0223496			312	…	0.0223496					PC181_203	0.552697	0.00357715	-0.00829216	0.0154465
GM3d181200	0.288002	313	0.000129534	yes	0.0224212			313	…	0.0224212					PC181_226a	0.00158975	0.0187048	0.00719968	0.0302099
PCO180181	0.288909	314	0.00012987	yes	0.0224928			314	…	0.0224928					PC181_226b	0.768126	0.00156331	-0.0088868	0.0120134
PC386a	0.289127	315	0.000130208	yes	0.0225645			315	…	0.0225645					PC182_182	0.429101	0.0061329	-0.00914055	0.0214064
LPC190sn1b	0.289329	316	0.000130548	yes	0.0226361			316	…	0.0226361					PC182_205	0.866983	-0.00092602	-0.011823	0.00997094
TGO543NL171	0.289875	317	0.00013089	yes	0.0227077			317	…	0.0227077					PC200_204	0.135301	0.00896827	-0.00282879	0.0207653
SM352b	0.290362	318	0.000131234	yes	0.0227794			318	…	0.0227794					PC280	0.00795374	-0.0143747	-0.0249403	-0.00380914
LPEP180	0.297055	319	0.000131579	yes	0.022851			319	…	0.022851					PC310a	0.0212309	-0.0130548	-0.024137	-0.0019726
Cerm181200	0.297585	320	0.000131926	yes	0.0229226			320	…	0.0229226					PC310b	0.493949	-0.00374721	-0.0145373	0.00704288
PE160_160	0.30059	321	0.000132275	yes	0.0229943			321	…	0.0229943					PC321	0.277139	-0.00519154	-0.014591	0.00420796
TG525NL205	0.302046	322	0.000132626	yes	0.0230659			322	…	0.0230659					PC322	0.664807	-0.0024952	-0.013843	0.00885256
PCP352a	0.303171	323	0.000132979	yes	0.0231375			323	…	0.0231375					PC330a	0.142295	-0.00833146	-0.019488	0.00282506
Cerd171200	0.305329	324	0.000133333	yes	0.0232092			324	…	0.0232092					PC330b	0.89428	0.00086338	-0.011942	0.0136688
LPCO180	0.305673	325	0.00013369	yes	0.0232808			325	…	0.0232808					PC331	0.246966	-0.00615676	-0.0166179	0.00430442
PEO181182	0.308073	326	0.000134048	yes	0.0233524			326	…	0.0233524					PC332	0.183839	0.00768244	-0.00368174	0.0190466
Cerd182170	0.309188	327	0.000134409	yes	0.0234241			327	…	0.0234241					PC345	0.477427	-0.00350512	-0.0132225	0.00621221
PEP180226	0.310596	328	0.000134771	yes	0.0234957			328	…	0.0234957					PC355	0.487748	-0.00352597	-0.0135346	0.0064827
PEP181224	0.310877	329	0.000135135	yes	0.0235673			329	…	0.0235673					PC360	0.240816	0.00596152	-0.00403617	0.0159592
Hex2Cerd181180	0.312912	330	0.000135501	yes	0.023639			330	…	0.023639					PC366a	0.936295	-0.00038783	-0.00995195	0.00917628
PCO180226	0.316135	331	0.00013587	yes	0.0237106			331	…	0.0237106					PC382	0.710688	0.00233313	-0.0100621	0.0147283
Hex2Cerd181220	0.316839	332	0.00013624	yes	0.0237822			332	…	0.0237822					PC384b	0.260412	-0.00615039	-0.0169022	0.00460138
PCO180182	0.317143	333	0.000136612	yes	0.0238539			333	…	0.0238539					PC385a	0.231717	0.00788239	-0.00508141	0.0208462
SMd182230	0.318153	334	0.000136986	yes	0.0239255			334	…	0.0239255					PC385b	0.971037	-0.00021009	-0.0116154	0.0111952
PCP363	0.319039	335	0.000137363	yes	0.0239971			335	…	0.0239971					PC386a	0.289127	0.00714375	-0.00611757	0.0204051
DG161_181	0.32204	336	0.000137741	yes	0.0240688			336	…	0.0240688					PC387c	0.210397	0.00694647	-0.00396025	0.0178532
PCP170204b	0.322734	337	0.000138122	yes	0.0241404			337	…	0.0241404					PC395a	0.556649	-0.00323666	-0.0140841	0.00761074
LPC183asn1104_sn1	0.322824	338	0.000138504	yes	0.024212			338	…	0.024212					PC395b	0.754847	0.00212829	-0.0113042	0.0155608
LPC191a	0.327677	339	0.000138889	yes	0.0242837			339	…	0.0242837					PC4010	0.63733	0.00367321	-0.0116793	0.0190257
PCP180204	0.330556	340	0.000139276	yes	0.0243553			340	…	0.0243553					PC407a	0.744797	0.00222161	-0.0112288	0.015672
CE225n6	0.331421	341	0.000139665	yes	0.0244269			341	…	0.0244269					PC408	0.73677	0.00220008	-0.0106988	0.0150989
PCP150204a	0.336454	342	0.000140056	yes	0.0244986			342	…	0.0244986					PC4412	0.27118	-0.00572617	-0.0159655	0.00451312
LPC220sn1	0.339947	343	0.000140449	yes	0.0245702			343	…	0.0245702					PCO160160	0.123921	0.00943186	-0.0026097	0.0214734
PEP160203a	0.340846	344	0.000140845	yes	0.0246418			344	…	0.0246418					PCO160203	0.503207	0.00372401	-0.00723328	0.0146813
TG567NL204	0.345311	345	0.000141243	yes	0.0247135			345	…	0.0247135					PCO160204	0.112879	0.00936206	-0.00223459	0.0209587
AC150b	0.348071	346	0.000141643	yes	0.0247851			346	…	0.0247851					PCO160226	0.6787	0.00197257	-0.00741106	0.0113562
CE202	0.352033	347	0.000142045	yes	0.0248567			347	…	0.0248567					PCO180181	0.288909	0.00553333	-0.00473382	0.0158005
PE160_182	0.352503	348	0.00014245	yes	0.0249284			348	…	0.0249284					PCO180182	0.317143	0.00538758	-0.00521238	0.0159875
SMd181180SMd161200	0.354383	349	0.000142857	yes	0.025			349	…	0.025					PCO180204	0.0730791	0.00851275	-0.00080477	0.0178303
TG521NL181	0.354923	350	0.000143266	yes	0.0250716			350	…	0.0250716					PCO180226	0.316135	0.00472204	-0.00454908	0.0139932
PEO341	0.355885	351	0.000143678	yes	0.0251433			351	…	0.0251433					PCO181181	0.129358	0.00946448	-0.00279429	0.0217232
LPC190sn1aLPC190	0.357364	352	0.000144092	yes	0.0252149			352	…	0.0252149					PCO181182	0.207364	0.00654316	-0.00366177	0.0167481
PE181_226a	0.35922	353	0.000144509	yes	0.0252865			353	…	0.0252865					PCO321	0.286895	0.00515824	-0.00437289	0.0146894
PI160_204	0.362203	354	0.000144928	yes	0.0253582			354	…	0.0253582					PCO322	0.831018	0.00102662	-0.00845523	0.0105085
TGO544NL171	0.364725	355	0.000145349	yes	0.0254298			355	…	0.0254298					PCO341	0.0768623	0.0119095	-0.00129804	0.0251171
LPC161sn2	0.366374	356	0.000145773	yes	0.0255014			356	…	0.0255014					PCO342	0.709486	0.00186709	-0.00800921	0.0117434
TG481NL161	0.367845	357	0.000146199	yes	0.0255731			357	…	0.0255731					PCO344	0.510551	-0.00354763	-0.0141682	0.00707295
Ubiquinone	0.369115	358	0.000146628	yes	0.0256447			358	…	0.0256447					PCO354	0.876019	0.00088537	-0.0102996	0.0120704
PE170_226	0.372253	359	0.000147059	yes	0.0257163			359	…	0.0257163					PCO360	0.207026	0.00749321	-0.00418494	0.0191714
PEP200226	0.373841	360	0.000147493	yes	0.025788			360	…	0.025788					PCO365	0.898753	-0.00057176	-0.0094288	0.00828528
LPCP181	0.375593	361	0.000147929	yes	0.0258596			361	…	0.0258596					PCO385	0.0358007	0.0132363	0.00088812	0.0255845
LPC15MHDAsn1LPC170	0.375976	362	0.000148368	yes	0.0259312			362	…	0.0259312					PCO405	0.0176685	0.0153136	0.00269598	0.0279313
TG543NL182	0.382442	363	0.00014881	yes	0.0260029			363	…	0.0260029					PCO407a	0.0736901	0.00984637	-0.00095398	0.0206467
PEP160183	0.382501	364	0.000149254	yes	0.0260745			364	…	0.0260745					PCO407b	0.0575957	0.0107504	-0.00035037	0.0218512
TG544NL182	0.383	365	0.000149701	yes	0.0261461			365	…	0.0261461					PCP150204a	0.336454	-0.00547008	-0.0166726	0.0057324
LPCP160	0.385609	366	0.00015015	yes	0.0262178			366	…	0.0262178					PCP150204b	0.645323	0.00247863	-0.00813286	0.0130901
SMd182160	0.386419	367	0.000150602	yes	0.0262894			367	…	0.0262894					PCP160140	0.705639	-0.00211209	-0.0131313	0.00890709
Cerd191230	0.386846	368	0.000151057	yes	0.026361			368	…	0.026361					PCP160160	0.171575	0.00824505	-0.00360937	0.0200995
LPC221sn1	0.394539	369	0.000151515	yes	0.0264327			369	…	0.0264327					PCP160161	0.276557	0.00665277	-0.00537772	0.0186833
DG182_204	0.394721	370	0.000151976	yes	0.0265043			370	…	0.0265043					PCP160181	0.718428	0.00225305	-0.0100612	0.0145673
HexCerd181160	0.395579	371	0.000152439	yes	0.0265759			371	…	0.0265759					PCP160182	0.056531	0.011184	-0.00031457	0.0226826
LPC226sn1	0.398196	372	0.000152905	yes	0.0266476			372	…	0.0266476					PCP160183	0.547778	0.0040543	-0.00923314	0.0173417
Cerm181220	0.399924	373	0.000153374	yes	0.0267192			373	…	0.0267192					PCP160204	0.124801	0.00933193	-0.00261014	0.021274
PEO160224	0.400437	374	0.000153846	yes	0.0267908			374	…	0.0267908					PCP160205	0.816249	0.000969	-0.00724975	0.00918776
Cerm180220	0.404829	375	0.000154321	yes	0.0268625			375	…	0.0268625					PCP160226	0.256999	0.00577765	-0.00425012	0.0158054
TG512NL170	0.408523	376	0.000154799	yes	0.0269341			376	…	0.0269341					PCP170204a	0.0975176	0.00958385	-0.00177052	0.0209382
TG512NL171	0.408523	377	0.00015528	yes	0.0270057			377	…	0.0270057					PCP170204b	0.322734	0.00611863	-0.00605994	0.0182972
dhCerd180220	0.408612	378	0.000155763	yes	0.0270774			378	…	0.0270774					PCP180182	0.442411	0.0043573	-0.00681406	0.0155287
PEP181181	0.408668	379	0.00015625	yes	0.027149			379	…	0.027149					PCP180204	0.330556	0.00546723	-0.00559269	0.0165271
Cerd181180	0.408669	380	0.00015674	yes	0.0272206			380	…	0.0272206					PCP180225	0.0520303	0.0117044	-0.00010406	0.0235129
Cerm181241	0.41086	381	0.000157233	yes	0.0272923			381	…	0.0272923					PCP180226	0.229663	0.00565922	-0.00360717	0.0149256
DG180_182	0.411769	382	0.000157729	yes	0.0273639			382	…	0.0273639					PCP181181	0.446179	0.00422289	-0.00669394	0.0151397
LPI204sn1	0.412199	383	0.000158228	yes	0.0274355			383	…	0.0274355					PCP181226	0.425776	0.00434977	-0.00640544	0.015105
TG502NL182	0.415216	384	0.00015873	yes	0.0275072			384	…	0.0275072					PCP200204	0.138657	0.00894347	-0.00292276	0.0208097
PCP181226	0.425776	385	0.000159236	yes	0.0275788			385	…	0.0275788					PCP352a	0.303171	0.00622652	-0.00567425	0.0181273
Cerm181240	0.426286	386	0.000159744	yes	0.0276504			386	…	0.0276504					PCP352b	0.866737	0.00108456	-0.0116547	0.0138238
DG181_181	0.427717	387	0.000160256	yes	0.0277221			387	…	0.0277221					PCP363	0.319039	0.00626568	-0.00611044	0.0186418
PC182_182	0.429101	388	0.000160772	yes	0.0277937			388	…	0.0277937					PCP385a	0.129021	0.00888513	-0.00261304	0.0203833
PEP181203b	0.431114	389	0.00016129	yes	0.0278653			389	…	0.0278653					PCP385b	0.513564	0.00363319	-0.00732156	0.0145879
PEP181204b	0.435744	390	0.000161812	yes	0.027937			390	…	0.027937					PE15MHDA_181	0.539854	-0.00361253	-0.0152213	0.00799622
SMd180220	0.43664	391	0.000162338	yes	0.0280086			391	…	0.0280086					PE15MHDA_182	0.553579	-0.00333459	-0.0144237	0.00775454
LPC224sn2	0.438206	392	0.000162866	yes	0.0280802			392	…	0.0280802					PE15MHDA_204	0.286646	-0.00574492	-0.0163551	0.00486525
HexCerd182240	0.43921	393	0.000163399	yes	0.0281519			393	…	0.0281519					PE15MHDA_226	0.873688	-0.00091288	-0.0122315	0.0104058
PEP181181a	0.440369	394	0.000163934	yes	0.0282235			394	…	0.0282235					PE160_160	0.30059	-0.00729079	-0.0211513	0.0065697
LPC225sn1n3LPC225	0.441564	395	0.000164474	yes	0.0282951			395	…	0.0282951					PE160_161	0.204289	-0.0059866	-0.0152601	0.0032869
LPCO240	0.441795	396	0.000165017	yes	0.0283668			396	…	0.0283668					PE160_181	0.205133	-0.00750165	-0.0191438	0.00414052
PCP180182	0.442411	397	0.000165563	yes	0.0284384			397	…	0.0284384					PE160_182	0.352503	-0.00493071	-0.0153705	0.00550911
PEP180182	0.44414	398	0.000166113	yes	0.02851			398	…	0.02851					PE160_183a	0.225423	-0.00694309	-0.0182082	0.00432206
PCP181181	0.446179	399	0.000166667	yes	0.0285817			399	…	0.0285817					PE160_183b	0.0339224	-0.0114053	-0.0219345	-0.00087616
LPI181sn1	0.447785	400	0.000167224	yes	0.0286533			400	…	0.0286533					PE160_203	0.134515	-0.00857075	-0.0198221	0.00268056
dhCerd180240	0.451021	401	0.000167785	yes	0.0287249			401	…	0.0287249					PE160_204	0.728314	-0.00214356	-0.0143044	0.0100173
TGO501NL160	0.452286	402	0.00016835	yes	0.0287966			402	…	0.0287966					PE160_205	0.145143	-0.0078732	-0.0184918	0.00274536
PC15MHDA_181	0.452408	403	0.000168919	yes	0.0288682			403	…	0.0288682					PE160_226	0.941005	-0.00049496	-0.0136775	0.0126875
SM410	0.45396	404	0.000169492	yes	0.0289398			404	…	0.0289398					PE161_182	0.669854	-0.0020936	-0.0117702	0.00758304
PC180_225n3PC201_204	0.454956	405	0.000170068	yes	0.0290115			405	…	0.0290115					PE161_204	0.764208	-0.00147021	-0.0111304	0.00818996
SM343	0.457191	406	0.000170648	yes	0.0290831			406	…	0.0290831					PE170_181	0.196626	-0.00816727	-0.0206042	0.0042696
TG502NL181	0.463994	407	0.000171233	yes	0.0291547			407	…	0.0291547					PE170_182	0.667705	-0.002521	-0.0140926	0.00905056
LPC171asn1104_sn1	0.470622	408	0.000171821	yes	0.0292264			408	…	0.0292264					PE170_204	0.740306	0.00200874	-0.00993525	0.0139527
TG482NL161	0.472279	409	0.000172414	yes	0.029298			409	…	0.029298					PE170_226	0.372253	0.00487453	-0.00588158	0.0156306
CE205	0.472746	410	0.00017301	yes	0.0293696			410	…	0.0293696					PE180_181	0.123239	-0.0109857	-0.0249853	0.003014
PEP181225a	0.474562	411	0.000173611	yes	0.0294413			411	…	0.0294413					PE180_182	0.199032	-0.00802454	-0.0203101	0.00426105
LPC225sn2n3	0.475825	412	0.000174216	yes	0.0295129			412	…	0.0295129					PE180_203a	0.25414	-0.00600323	-0.01636	0.00435356
PC345	0.477427	413	0.000174825	yes	0.0295845			413	…	0.0295845					PE180_203b	0.046683	-0.00981998	-0.0194941	-0.00014582
PI386	0.478495	414	0.000175439	yes	0.0296562			414	…	0.0296562					PE180_204	0.918471	0.0006358	-0.0116071	0.0128787
LPI182sn1	0.479916	415	0.000176056	yes	0.0297278			415	…	0.0297278					PE180_224	0.272946	-0.00470703	-0.0131549	0.00374086
TG522NL160	0.480062	416	0.000176678	yes	0.0297994			416	…	0.0297994					PE180_225n3	0.285561	-0.0061651	-0.0175253	0.00519512
Cerd181230	0.480639	417	0.000177305	yes	0.0298711			417	…	0.0298711					PE180_225n6	0.132666	-0.0065831	-0.0151839	0.00201774
PI181_182	0.481247	418	0.000177936	yes	0.0299427			418	…	0.0299427					PE180_226	0.833736	-0.00140651	-0.0146126	0.0117996
TGO501NL171	0.482766	419	0.000178571	yes	0.0300143			419	…	0.0300143					PE181_181	0.996206	-3.223e-05	-0.0133946	0.0133301
PC355	0.487748	420	0.000179211	yes	0.030086			420	…	0.030086					PE181_182	0.727755	-0.00229946	-0.0153169	0.010718
PC150_204	0.488693	421	0.000179856	yes	0.0301576			421	…	0.0301576					PE181_226a	0.35922	0.00532117	-0.00610449	0.0167468
PEO160204	0.48993	422	0.000180505	yes	0.0302292			422	…	0.0302292					PE181_226b	0.706155	0.00204431	-0.00864125	0.0127299
PS384	0.491765	423	0.000181159	yes	0.0303009			423	…	0.0303009					PE200_204	0.999756	2.112e-06	-0.0136091	0.0136133
PC310b	0.493949	424	0.000181818	yes	0.0303725			424	…	0.0303725					PE360	0.779698	-0.00209361	-0.0168449	0.0126577
Hex3Cerd181200	0.499062	425	0.000182482	yes	0.0304441			425	…	0.0304441					PE385a	0.707567	0.00233876	-0.00994744	0.014625
PCO160203	0.503207	426	0.00018315	yes	0.0305158			426	…	0.0305158					PE385b	0.194909	-0.00720372	-0.0181311	0.00372363
Sulfatided181160OH	0.504324	427	0.000183824	yes	0.0305874			427	…	0.0305874					PEO160182	0.748075	0.00168776	-0.00866834	0.0120439
DG182_182	0.504523	428	0.000184502	yes	0.030659			428	…	0.030659					PEO160203	0.172228	-0.0078717	-0.0192071	0.00346368
TG546NL204	0.504579	429	0.000185185	yes	0.0307307			429	…	0.0307307					PEO160204	0.48993	0.00335869	-0.00622318	0.0129406
dhCerd180180	0.508233	430	0.000185874	yes	0.0308023			430	…	0.0308023					PEO160224	0.400437	-0.00524205	-0.0175181	0.007034
PCO344	0.510551	431	0.000186567	yes	0.0308739			431	…	0.0308739					PEO160226	0.276468	0.00586559	-0.00473966	0.0164708
PI180_225n6	0.512231	432	0.000187266	yes	0.0309456			432	…	0.0309456					PEO180204	0.945408	0.00035695	-0.00991781	0.0106317
PCP385b	0.513564	433	0.00018797	yes	0.0310172			433	…	0.0310172					PEO180225	0.136048	-0.00833511	-0.0193207	0.00265049
TG569NL226	0.515751	434	0.000188679	yes	0.0310888			434	…	0.0310888					PEO180226	0.5341	-0.00341767	-0.0142463	0.00741093
PEP180181	0.518373	435	0.000189394	yes	0.0311605			435	…	0.0311605					PEO181182	0.308073	0.00589053	-0.0054834	0.0172645
PEP180225n3	0.519657	436	0.000190114	yes	0.0312321			436	…	0.0312321					PEO181226	0.622928	0.00260572	-0.00783619	0.0130476
TG524NL183	0.522575	437	0.00019084	yes	0.0313037			437	…	0.0313037					PEO341	0.355885	0.00606292	-0.00686488	0.0189907
TG504NL204	0.526081	438	0.000191571	yes	0.0313754			438	…	0.0313754					PEO365	0.611455	-0.0022296	-0.0108775	0.00641832
DG160_204	0.526361	439	0.000192308	yes	0.031447			439	…	0.031447					PEO385a	0.698823	0.0021783	-0.00891628	0.0132729
AC141	0.526994	440	0.00019305	yes	0.0315186			440	…	0.0315186					PEO385b	0.0871785	-0.00889058	-0.0190919	0.00131068
Cerd181210	0.528621	441	0.000193798	yes	0.0315903			441	…	0.0315903					PEP150204a	0.575568	-0.00318842	-0.0144083	0.00803142
DG160_160	0.530688	442	0.000194553	yes	0.0316619			442	…	0.0316619					PEP150204b	0.147579	0.00804563	-0.0028716	0.0189629
CE181	0.533591	443	0.000195313	yes	0.0317335			443	…	0.0317335					PEP150226a	0.535769	-0.00365845	-0.0152971	0.0079802
PEO180226	0.5341	444	0.000196078	yes	0.0318052			444	…	0.0318052					PEP150226b	0.788865	-0.00143441	-0.0119914	0.00912257
LPI180sn1	0.535469	445	0.00019685	yes	0.0318768			445	…	0.0318768					PEP160181	0.247191	0.00624122	-0.00436856	0.016851
PEP150226a	0.535769	446	0.000197628	yes	0.0319484			446	…	0.0319484					PEP160182	0.159203	0.00727064	-0.00287984	0.0174211
PI180_224	0.53583	447	0.000198413	yes	0.0320201			447	…	0.0320201					PEP160183	0.382501	0.00538882	-0.00676026	0.0175379
LPC226sn2	0.536302	448	0.000199203	yes	0.0320917			448	…	0.0320917					PEP160203a	0.340846	0.0047084	-0.00502225	0.0144391
LPC180sn2	0.537093	449	0.0002	yes	0.0321633			449	…	0.0321633					PEP160203b	0.684043	0.00210498	-0.00808886	0.0122988
PC180_225n6	0.539697	450	0.000200803	yes	0.032235			450	…	0.032235					PEP160204	0.0194369	0.0133487	0.00218047	0.0245168
PE15MHDA_181	0.539854	451	0.000201613	yes	0.0323066			451	…	0.0323066					PEP160205	0.618768	0.00196785	-0.00582424	0.00975995
LPI204sn2	0.539931	452	0.000202429	yes	0.0323782			452	…	0.0323782					PEP160224	0.595362	0.00322345	-0.00873505	0.0151819
LPC180sn1	0.540087	453	0.000203252	yes	0.0324499			453	…	0.0324499					PEP160225n3	0.82996	0.00126674	-0.0103593	0.0128928
TGO503NL182	0.541556	454	0.000204082	yes	0.0325215			454	…	0.0325215					PEP160225n6	0.695905	-0.00173298	-0.0104706	0.00700463
dhCerd180241	0.544345	455	0.000204918	yes	0.0325931			455	…	0.0325931					PEP160226	0.84839	0.00107856	-0.0100415	0.0121986
PCP160183	0.547778	456	0.000205761	yes	0.0326648			456	…	0.0326648					PEP170204a	0.154159	0.0079298	-0.00300607	0.0188657
LPC150sn2	0.552384	457	0.000206612	yes	0.0327364			457	…	0.0327364					PEP170204b	0.199092	0.00619184	-0.00328914	0.0156728
PC181_203	0.552697	458	0.000207469	yes	0.032808			458	…	0.032808					PEP170226a	0.907608	-0.00052593	-0.00945854	0.00840668
PE15MHDA_182	0.553579	459	0.000208333	yes	0.0328797			459	…	0.0328797					PEP170226b	0.919594	-0.0004664	-0.00957349	0.00864069
TG503NL140	0.553604	460	0.000209205	yes	0.0329513			460	…	0.0329513					PEP180181	0.518373	0.00348544	-0.00714508	0.014116
SMd182140	0.555776	461	0.000210084	yes	0.0330229			461	…	0.0330229					PEP180182	0.44414	0.00432258	-0.00680195	0.0154471
PC395a	0.556649	462	0.00021097	yes	0.0330946			462	…	0.0330946					PEP180183	0.859492	0.00127532	-0.0129242	0.0154748
PI376	0.557118	463	0.000211864	yes	0.0331662			463	…	0.0331662					PEP180203a	0.927815	0.00049405	-0.0102553	0.0112434
TG567NL205	0.559323	464	0.000212766	yes	0.0332378			464	…	0.0332378					PEP180203b	0.632924	0.00220871	-0.00690385	0.0113213
TG545NL204	0.560152	465	0.000213675	yes	0.0333095			465	…	0.0333095					PEP180204	0.0923234	0.0085306	-0.001417	0.0184782
DG181_205	0.563348	466	0.000214592	yes	0.0333811			466	…	0.0333811					PEP180205	0.827816	0.0008537	-0.00688217	0.00858957
Cerm180240	0.565718	467	0.000215517	yes	0.0334527			467	…	0.0334527					PEP180224	0.713497	0.00240099	-0.0104857	0.0152877
LPE170sn2	0.566936	468	0.00021645	yes	0.0335244			468	…	0.0335244					PEP180225n3	0.519657	0.00368624	-0.00759168	0.0149642
LPC181sn2	0.567193	469	0.000217391	yes	0.033596			469	…	0.033596					PEP180225n6	0.619505	-0.00253293	-0.0125837	0.00751784
PEP181181b	0.571905	470	0.000218341	yes	0.0336676			470	…	0.0336676					PEP180226	0.310596	0.00493207	-0.00464089	0.014505
CE140	0.572118	471	0.000219298	yes	0.0337393			471	…	0.0337393					PEP181181	0.408668	0.00526376	-0.00728073	0.0178083
LPE182sn2	0.572127	472	0.000220264	yes	0.0338109			472	…	0.0338109					PEP181181a	0.440369	0.00497272	-0.00771949	0.0176649
CE200	0.575448	473	0.000221239	yes	0.0338825			473	…	0.0338825					PEP181181b	0.571905	0.00307025	-0.0076312	0.0137717
PEP150204a	0.575568	474	0.000222222	yes	0.0339542			474	…	0.0339542					PEP181182a	0.235601	0.00679339	-0.00447298	0.0180598
PEP181205a	0.579071	475	0.000223214	yes	0.0340258			475	…	0.0340258					PEP181182b	0.987962	-8.267e-05	-0.010883	0.0107176
TG525NL204	0.579124	476	0.000224215	yes	0.0340974			476	…	0.0340974					PEP181183	0.238874	0.00855139	-0.00573021	0.022833
Cerd191200	0.581856	477	0.000225225	yes	0.0341691			477	…	0.0341691					PEP181203a	0.710979	0.0020299	-0.0087661	0.0128259
Cerd181190	0.582648	478	0.000226244	yes	0.0342407			478	…	0.0342407					PEP181203b	0.431114	-0.00415467	-0.0145474	0.00623809
LPC161sn1	0.583586	479	0.000227273	yes	0.0343123			479	…	0.0343123					PEP181204a	0.0589804	0.00932804	-0.00035774	0.0190138
PI396	0.584168	480	0.000228311	yes	0.034384			480	…	0.034384					PEP181204b	0.435744	0.00412929	-0.0063044	0.014563
Hex2Cerd182241	0.587916	481	0.000229358	yes	0.0344556			481	…	0.0344556					PEP181205a	0.579071	0.00235002	-0.00599631	0.0106964
PC180_203	0.58902	482	0.000230415	yes	0.0345272			482	…	0.0345272					PEP181205b	0.659987	0.00223516	-0.00777727	0.0122476
HexCerd182220	0.591317	483	0.000231481	yes	0.0345989			483	…	0.0345989					PEP181224	0.310877	0.00676217	-0.00637059	0.0198949
LPC191b	0.592899	484	0.000232558	yes	0.0346705			484	…	0.0346705					PEP181225a	0.474562	0.00446301	-0.00783006	0.0167561
PEP160224	0.595362	485	0.000233645	yes	0.0347421			485	…	0.0347421					PEP181225b	0.217383	-0.00696149	-0.018061	0.00413801
TG532NL181	0.600409	486	0.000234742	yes	0.0348138			486	…	0.0348138					PEP181226a	0.263754	0.00599838	-0.00456188	0.0165586
HexCerd161240	0.600752	487	0.000235849	yes	0.0348854			487	…	0.0348854					PEP181226b	0.75233	0.0015993	-0.00838885	0.0115874
PI362	0.602261	488	0.000236967	yes	0.034957			488	…	0.034957					PEP190204a	0.833575	0.00093096	-0.00780297	0.00966489
LPCP180	0.609983	489	0.000238095	yes	0.0350287			489	…	0.0350287					PEP190204b	0.211112	0.00673759	-0.00385783	0.017333
Cerd182210	0.610401	490	0.000239234	yes	0.0351003			490	…	0.0351003					PEP200181	0.168566	0.00836063	-0.00357513	0.0202964
LPC221sn2	0.610466	491	0.000240385	yes	0.0351719			491	…	0.0351719					PEP200182	0.224176	0.00680914	-0.00420909	0.0178274
PEO365	0.611455	492	0.000241546	yes	0.0352436			492	…	0.0352436					PEP200204	0.172585	0.00757855	-0.00334382	0.0185009
CE161	0.611704	493	0.000242718	yes	0.0353152			493	…	0.0353152					PEP200226	0.373841	0.00401835	-0.00487808	0.0129148
PC140_204	0.612541	494	0.000243902	yes	0.0353868			494	…	0.0353868					PEP201204	0.0496329	0.00954184	1.549e-05	0.0190682
LPE204sn1	0.615364	495	0.000245098	yes	0.0354585			495	…	0.0354585					PEP201226	0.26164	0.00503397	-0.00378931	0.0138572
PI180_181	0.616479	496	0.000246305	yes	0.0355301			496	…	0.0355301					PG341	0.765955	0.00178852	-0.0100528	0.0136298
LPC171sn2a	0.617312	497	0.000247525	yes	0.0356017			497	…	0.0356017					PG342	0.897857	0.00086445	-0.0124085	0.0141374
PEP160205	0.618768	498	0.000248756	yes	0.0356734			498	…	0.0356734					PG361	0.695036	-0.00252385	-0.0152108	0.0101631
PEP180225n6	0.619505	499	0.00025	yes	0.035745			499	…	0.035745					PG362	0.0249408	-0.0136162	-0.025497	-0.00173546
Cerd182260	0.621031	500	0.000251256	yes	0.0358166			500	…	0.0358166					PI15MHDA_181PI170_181	0.174536	-0.00708381	-0.0173395	0.00317184
PEO181226	0.622928	501	0.000252525	yes	0.0358883			501	…	0.0358883					PI15MHDA_182PI170_182	0.918468	0.00060701	-0.0110814	0.0122954
PI180_225n3	0.625652	502	0.000253807	yes	0.0359599			502	…	0.0359599					PI15MHDA_204PI170_204	0.761646	0.00191951	-0.0105522	0.0143913
LPC205sn1	0.632635	503	0.000255102	yes	0.0360315			503	…	0.0360315					PI160160	0.0704097	-0.00969543	-0.0202072	0.00081638
TG545NL183	0.632707	504	0.00025641	yes	0.0361032			504	…	0.0361032					PI160_161	0.170045	-0.0063923	-0.0155501	0.00276548
PEP180203b	0.632924	505	0.000257732	yes	0.0361748			505	…	0.0361748					PI160_203a	0.690829	-0.00241194	-0.0143621	0.00953823
Cerm180230	0.6341	506	0.000259067	yes	0.0362464			506	…	0.0362464					PI160_203b	0.0979536	-0.0102281	-0.0223618	0.00190554
PC4010	0.63733	507	0.000260417	yes	0.0363181			507	…	0.0363181					PI160_204	0.362203	-0.00578815	-0.0182938	0.00671751
LPC15MHDAsn1104_sn1	0.639425	508	0.00026178	yes	0.0363897			508	…	0.0363897					PI180_181	0.616479	-0.00295517	-0.0145808	0.00867044
LPE182sn1	0.641242	509	0.000263158	yes	0.0364613			509	…	0.0364613					PI180_202	0.120945	0.00771546	-0.00205613	0.017487
LPC260sn1	0.643052	510	0.00026455	yes	0.036533			510	…	0.036533					PI180_203a	0.929739	-0.00041942	-0.00979521	0.00895636
PCP150204b	0.645323	511	0.000265957	yes	0.0366046			511	…	0.0366046					PI180_203b	0.802429	-0.00128452	-0.011403	0.00883399
Cerd201230	0.646022	512	0.00026738	yes	0.0366762			512	…	0.0366762					PI180_204	0.0858037	0.0102414	-0.00145797	0.0219407
DG160_181	0.649684	513	0.000268817	yes	0.0367479			513	…	0.0367479					PI180_224	0.53583	-0.00320764	-0.013414	0.00699869
LPC171sn1aLPC171	0.650234	514	0.00027027	yes	0.0368195			514	…	0.0368195					PI180_225n3	0.625652	-0.00308527	-0.0155461	0.00937558
Sulfatided181180OH	0.651359	515	0.000271739	yes	0.0368911			515	…	0.0368911					PI180_225n6	0.512231	-0.00372609	-0.0149254	0.00747324
TGO502NL182	0.652851	516	0.000273224	yes	0.0369628			516	…	0.0369628					PI180_226	0.785445	0.00172556	-0.0107668	0.0142179
LPC240sn2	0.65545	517	0.000274725	yes	0.0370344			517	…	0.0370344					PI181_182	0.481247	0.00436896	-0.0078495	0.0165874
LPC182sn1	0.658084	518	0.000276243	yes	0.037106			518	…	0.037106					PI200_204	0.0671365	0.0115485	-0.00082404	0.023921
TG512NL150	0.658814	519	0.000277778	yes	0.0371777			519	…	0.0371777					PI340	0.820904	-0.00107337	-0.0104183	0.00827151
LPEP160	0.659128	520	0.00027933	yes	0.0372493			520	…	0.0372493					PI341	0.229623	-0.00648095	-0.0170919	0.00413001
PEP181205b	0.659987	521	0.000280899	yes	0.0373209			521	…	0.0373209					PI362	0.602261	0.00305154	-0.00848513	0.0145882
LPC15MHDAsn2	0.661431	522	0.000282486	yes	0.0373926			522	…	0.0373926					PI376	0.557118	-0.00400343	-0.0174366	0.00942972
DG140_182	0.66174	523	0.000284091	yes	0.0374642			523	…	0.0374642					PI385a	0.88736	-0.00091522	-0.0136506	0.0118201
PC322	0.664807	524	0.000285714	yes	0.0375358			524	…	0.0375358					PI385b	0.860385	-0.00100654	-0.0122862	0.0102731
LPE180sn2	0.665835	525	0.000287356	yes	0.0376074			525	…	0.0376074					PI386	0.478495	-0.00467292	-0.0176593	0.00831347
TGO542NL181	0.66724	526	0.000289017	yes	0.0376791			526	…	0.0376791					PI396	0.584168	0.00327297	-0.00850899	0.0150549
PE170_182	0.667705	527	0.000290698	yes	0.0377507			527	…	0.0377507					PS361	0.102538	0.00932887	-0.00188948	0.0205472
PE161_182	0.669854	528	0.000292398	yes	0.0378223			528	…	0.0378223					PS362	0.221077	0.00572854	-0.00347857	0.0149356
LPEP181	0.671071	529	0.000294118	yes	0.037894			529	…	0.037894					PS383	0.220181	0.00742775	-0.00448714	0.0193426
LPCP170b	0.672308	530	0.000295858	yes	0.0379656			530	…	0.0379656					PS384	0.491765	0.00406499	-0.00758113	0.0157111
LPC182sn2	0.672974	531	0.000297619	yes	0.0380372			531	…	0.0380372					PS385	0.231214	0.0074484	-0.0047884	0.0196852
CE170	0.674545	532	0.000299401	yes	0.0381089			532	…	0.0381089					PS405	0.0818256	0.0110254	-0.00140729	0.0234581
Sphd182	0.676062	533	0.000301205	yes	0.0381805			533	…	0.0381805					PS406	0.143196	0.00867626	-0.00296837	0.0203209
PCO160226	0.6787	534	0.00030303	yes	0.0382521			534	…	0.0382521					S1Pd161	0.074378	0.0122478	-0.00121896	0.0257146
LPC205sn2	0.679024	535	0.000304878	yes	0.0383238			535	…	0.0383238					S1Pd180	0.0489908	0.0102127	4.568e-05	0.0203797
LPC204sn1	0.679732	536	0.000306748	yes	0.0383954			536	…	0.0383954					S1Pd181	0.128154	0.0101024	-0.0029412	0.0231461
PEP160203b	0.684043	537	0.000308642	yes	0.038467			537	…	0.038467					S1Pd182	0.0714925	0.0105577	-0.00093336	0.0220487
PC150_203	0.685015	538	0.000310559	yes	0.0385387			538	…	0.0385387					SM343	0.457191	0.00411614	-0.00678738	0.0150197
GM3d181240	0.688651	539	0.0003125	yes	0.0386103			539	…	0.0386103					SM352b	0.290362	0.00522821	-0.00450239	0.0149588
PI160_203a	0.690829	540	0.000314465	yes	0.0386819			540	…	0.0386819					SM371	0.113593	0.00934613	-0.0022539	0.0209462
Cerd161200	0.691991	541	0.000316456	yes	0.0387536			541	…	0.0387536					SM372	0.07406	0.0102772	-0.00101031	0.0215648
PG361	0.695036	542	0.000318471	yes	0.0388252			542	…	0.0388252					SM383a	0.0216773	0.0141856	0.0021015	0.0262698
PEP160225n6	0.695905	543	0.000320513	yes	0.0388968			543	…	0.0388968					SM383b	0.212164	0.00701242	-0.00404072	0.0180656
dhCerd180160	0.696717	544	0.000322581	yes	0.0389685			544	…	0.0389685					SM403a	0.0458944	0.0128876	0.00023766	0.0255376
PEO385a	0.698823	545	0.000324675	yes	0.0390401			545	…	0.0390401					SM403b	0.149594	0.00708406	-0.00257651	0.0167446
Cerm181180	0.704618	546	0.000326797	yes	0.0391117			546	…	0.0391117					SM410	0.45396	0.0045808	-0.00746675	0.0166284
AC130	0.704667	547	0.000328947	yes	0.0391834			547	…	0.0391834					SM411a	0.107434	0.00890682	-0.00195711	0.0197708
PCP160140	0.705639	548	0.000331126	yes	0.039255			548	…	0.039255					SM431	0.0163141	0.0134864	0.0025122	0.0244605
PE181_226b	0.706155	549	0.000333333	yes	0.0393266			549	…	0.0393266					SM432b	0.209772	0.00676643	-0.00384299	0.0173758
LPC225n3sn1104_sn1	0.706924	550	0.00033557	yes	0.0393983			550	…	0.0393983					SM432c	0.0700628	0.0107069	-0.00088701	0.0223008
PE385a	0.707567	551	0.000337838	yes	0.0394699			551	…	0.0394699					SM441	0.0369021	0.01152	0.00070859	0.0223314
TGO542NL171	0.707971	552	0.000340136	yes	0.0395415			552	…	0.0395415					SM442	0.00204268	0.0162083	0.00599312	0.0264234
CE246	0.708832	553	0.000342466	yes	0.0396132			553	…	0.0396132					SM443	0.0106541	0.0148094	0.00348862	0.0261302
PCO342	0.709486	554	0.000344828	yes	0.0396848			554	…	0.0396848					SMd161190	0.0828404	0.00961441	-0.00126346	0.0204923
PC382	0.710688	555	0.000347222	yes	0.0397564			555	…	0.0397564					SMd161230SMd171220	0.0695804	0.0107419	-0.00086967	0.0223535
PEP181203a	0.710979	556	0.00034965	yes	0.0398281			556	…	0.0398281					SMd161241	0.0153098	0.0136674	0.00265392	0.0246808
TG566NL225a	0.71189	557	0.000352113	yes	0.0398997			557	…	0.0398997					SMd171140	0.148796	0.0073932	-0.00266907	0.0174555
TG566NL225b	0.71189	558	0.00035461	yes	0.0399713			558	…	0.0399713					SMd171160	0.0182593	0.0142394	0.00244533	0.0260334
PEP180224	0.713497	559	0.000357143	yes	0.040043			559	…	0.040043					SMd171241	0.0227601	0.0124931	0.00176281	0.0232234
TG547NL226	0.71594	560	0.000359712	yes	0.0401146			560	…	0.0401146					SMd180140	0.945035	-0.00044822	-0.0132624	0.012366
PCP160181	0.718428	561	0.000362319	yes	0.0401862			561	…	0.0401862					SMd180160	0.197988	0.00835137	-0.00440474	0.0211075
LPC202sn2	0.725393	562	0.000364964	yes	0.0402579			562	…	0.0402579					SMd180220	0.43664	0.00416473	-0.00637882	0.0147083
PE181_182	0.727755	563	0.000367647	yes	0.0403295			563	…	0.0403295					SMd181140SMd161160	0.118154	0.00942251	-0.00242068	0.0212657
PE160_204	0.728314	564	0.00037037	yes	0.0404011			564	…	0.0404011					SMd181160	0.178524	0.00789904	-0.00364334	0.0194414
PC160_183a	0.730286	565	0.000373134	yes	0.0404728			565	…	0.0404728					SMd181170SMd171180	0.0924106	0.00962467	-0.00160176	0.0208511
CE220	0.730598	566	0.00037594	yes	0.0405444			566	…	0.0405444					SMd181180SMd161200	0.354383	0.00522595	-0.00588238	0.0163343
LPC190asn1104_sn1	0.734193	567	0.000378788	yes	0.040616			567	…	0.040616					SMd181200SMd161220	0.0758462	0.0103124	-0.00108415	0.0217089
PC408	0.73677	568	0.000381679	yes	0.0406877			568	…	0.0406877					SMd181220SMd161240	0.103206	0.00879086	-0.00180121	0.0193829
Cerd181170	0.738308	569	0.000384615	yes	0.0407593			569	…	0.0407593					SMd181230SMd171240	0.242905	0.0063197	-0.00432597	0.0169654
PE170_204	0.740306	570	0.000387597	yes	0.0408309			570	…	0.0408309					SMd181240	0.00885581	0.012935	0.00329248	0.0225774
PC170_181	0.740669	571	0.000390625	yes	0.0409026			571	…	0.0409026					SMd181241	0.0334027	0.0113624	0.00090386	0.021821
AC142	0.741079	572	0.000393701	yes	0.0409742			572	…	0.0409742					SMd182140	0.555776	-0.00292077	-0.0126878	0.0068463
LPC203sn1	0.741725	573	0.000396825	yes	0.0410458			573	…	0.0410458					SMd182160	0.386419	0.00537715	-0.00684616	0.0176005
LPC181sn1	0.741986	574	0.0004	yes	0.0411175			574	…	0.0411175					SMd182170	0.124648	0.00847541	-0.00236612	0.0193169
PC407a	0.744797	575	0.000403226	yes	0.0411891			575	…	0.0411891					SMd182180	0.237751	0.00606379	-0.00403901	0.0161666
PEO160182	0.748075	576	0.000406504	yes	0.0412607			576	…	0.0412607					SMd182181	0.0814803	0.00919407	-0.0011617	0.0195499
HexCerd161180	0.750931	577	0.000409836	yes	0.0413324			577	…	0.0413324					SMd182200	0.0977942	0.00983762	-0.00182709	0.0215023
PEP181226b	0.75233	578	0.000413223	yes	0.041404			578	…	0.041404					SMd182220	0.0911195	0.0102689	-0.00166105	0.0221989
LPE160sn2	0.752584	579	0.000416667	yes	0.0414756			579	…	0.0414756					SMd182230	0.318153	0.00559524	-0.00543633	0.0166268
PC395b	0.754847	580	0.000420168	yes	0.0415473			580	…	0.0415473					SMd182240	0.116583	0.00923134	-0.0023216	0.0207843
LPC225sn1n6	0.757596	581	0.000423729	yes	0.0416189			581	…	0.0416189					SMd191241	0.00898215	0.0140841	0.00356514	0.024603
TGO522NL181	0.760798	582	0.00042735	yes	0.0416905			582	…	0.0416905					Sphd161	0.0305151	0.0132427	0.00125974	0.0252257
PC180_182	0.761174	583	0.000431034	yes	0.0417622			583	…	0.0417622					Sphd181	0.898443	-0.00077093	-0.0126766	0.0111347
PI15MHDA_204PI170_204	0.761646	584	0.000434783	yes	0.0418338			584	…	0.0418338					Sphd182	0.676062	-0.00262381	-0.0149977	0.00975008
Cerd182230	0.761691	585	0.000438596	yes	0.0419054			585	…	0.0419054					Sulfatided181160	0.0826525	0.0121624	-0.00158983	0.0259147
Cerd201240	0.762007	586	0.000442478	yes	0.0419771			586	…	0.0419771					Sulfatided181160OH	0.504324	0.00411239	-0.0080194	0.0162442
PE161_204	0.764208	587	0.000446429	yes	0.0420487			587	…	0.0420487					Sulfatided181180	0.858747	0.00119077	-0.0119966	0.0143782
PG341	0.765955	588	0.00045045	yes	0.0421203			588	…	0.0421203					Sulfatided181180OH	0.651359	-0.00319484	-0.0171264	0.0107367
LPC202sn1	0.766015	589	0.000454545	yes	0.042192			589	…	0.042192					Sulfatided181240	0.121589	0.0105318	-0.00282995	0.0238936
PC181_226b	0.768126	590	0.000458716	yes	0.0422636			590	…	0.0422636					Sulfatided181240OH	0.93228	0.00056624	-0.0125678	0.0137003
LPC191c	0.772581	591	0.000462963	yes	0.0423352			591	…	0.0423352					Sulfatided181241	0.275106	0.00739713	-0.0059389	0.0207332
LPC204sn2	0.772739	592	0.00046729	yes	0.0424069			592	…	0.0424069					Sulfatided181241OH	0.959253	-0.00030698	-0.0121499	0.011536
LPI182sn2	0.773868	593	0.000471698	yes	0.0424785			593	…	0.0424785					TG480NL160	0.0722091	-0.00902879	-0.0188808	0.00082325
PE360	0.779698	594	0.00047619	yes	0.0425501			594	…	0.0425501					TG480NL180	0.00096212	-0.0221076	-0.0350965	-0.00911878
Cerd171180	0.783363	595	0.000480769	yes	0.0426218			595	…	0.0426218					TG481NL161	0.367845	-0.00390799	-0.0124516	0.00463564
PI180_226	0.785445	596	0.000485437	yes	0.0426934			596	…	0.0426934					TG481NL181	0.0120567	-0.0154279	-0.0274291	-0.00342672
PEP150226b	0.788865	597	0.000490196	yes	0.042765			597	…	0.042765					TG482NL140	0.0244969	-0.0123958	-0.0231779	-0.0016136
AC180	0.794906	598	0.00049505	yes	0.0428367			598	…	0.0428367					TG482NL141	0.0123896	-0.0140382	-0.0250012	-0.00307521
TGO502NL181	0.797947	599	0.0005	yes	0.0429083			599	…	0.0429083					TG482NL161	0.472279	-0.00319691	-0.011957	0.00556313
PI180_203b	0.802429	600	0.000505051	yes	0.0429799			600	…	0.0429799					TG482NL182	0.0111206	-0.0149946	-0.0265259	-0.00346343
TG5810NL226	0.802742	601	0.000510204	yes	0.0430516			601	…	0.0430516					TG483NL140	0.062184	-0.00960208	-0.0196986	0.00049442
TG542NL201	0.807858	602	0.000515464	yes	0.0431232			602	…	0.0431232					TG483NL161	0.272284	-0.0052576	-0.0146805	0.00416535
Cerd181140	0.81084	603	0.000520833	yes	0.0431948			603	…	0.0431948					TG483NL183	0.00939691	-0.0145344	-0.0254556	-0.00361319
AC140	0.813586	604	0.000526316	yes	0.0432665			604	…	0.0432665					TG491NL161	0.139108	-0.00850239	-0.0197962	0.00279144
PCP160205	0.816249	605	0.000531915	yes	0.0433381			605	…	0.0433381					TG491NL171	0.209609	-0.00648242	-0.0166429	0.00367803
TG544NL203	0.817332	606	0.000537634	yes	0.0434097			606	…	0.0434097					TG500NL180	0.00164527	-0.0179636	-0.029049	-0.00687818
PI340	0.820904	607	0.000543478	yes	0.0434814			607	…	0.0434814					TG501NL140	0.00085552	-0.0209128	-0.0330749	-0.00875074
LPC190sn2a	0.823115	608	0.000549451	yes	0.043553			608	…	0.043553					TG501NL160	0.0494141	-0.0109868	-0.0219452	-2.848e-05
TG523NL182	0.824267	609	0.000555556	yes	0.0436246			609	…	0.0436246					TG501NL181	0.0278842	-0.0124123	-0.0234596	-0.00136497
Cerd182180	0.824879	610	0.000561798	yes	0.0436963			610	…	0.0436963					TG502NL140	0.129621	-0.0114555	-0.0263034	0.00339237
PEP180205	0.827816	611	0.000568182	yes	0.0437679			611	…	0.0437679					TG502NL161	0.831183	0.0010728	-0.00884536	0.0109909
DG160_182	0.828771	612	0.000574713	yes	0.0438395			612	…	0.0438395					TG502NL181	0.463994	-0.00421381	-0.015547	0.00711935
LPI180sn2	0.829624	613	0.000581395	yes	0.0439112			613	…	0.0439112					TG502NL182	0.415216	-0.00475357	-0.0162423	0.00673513
PEP160225n3	0.82996	614	0.000588235	yes	0.0439828			614	…	0.0439828					TG503NL140	0.553604	-0.00416776	-0.0180285	0.00969294
LPE170sn1	0.830267	615	0.000595238	yes	0.0440544			615	…	0.0440544					TG503NL141	0.142667	-0.0095538	-0.0223592	0.00325155
PCO322	0.831018	616	0.00060241	yes	0.0441261			616	…	0.0441261					TG503NL161	0.228941	0.00577897	-0.00366876	0.0152267
TG502NL161	0.831183	617	0.000609756	yes	0.0441977			617	…	0.0441977					TG503NL182	0.994691	-3.97e-05	-0.0118019	0.0117225
PEP190204a	0.833575	618	0.000617284	yes	0.0442693			618	…	0.0442693					TG503NL183	0.0761094	-0.00912969	-0.0192283	0.00096895
PE180_226	0.833736	619	0.000625	yes	0.044341			619	…	0.044341					TG504NL140	0.195015	-0.0073655	-0.0185409	0.00380991
LPCP170a	0.837597	620	0.000632911	yes	0.0444126			620	…	0.0444126					TG504NL183	0.0894467	-0.0101177	-0.0218105	0.00157515
LPC203sn2	0.842191	621	0.000641026	yes	0.0444842			621	…	0.0444842					TG504NL204	0.526081	-0.00383273	-0.0157413	0.00807588
PEP160226	0.84839	622	0.000649351	yes	0.0445559			622	…	0.0445559					TG510NL160	0.00432061	-0.0182692	-0.0307372	-0.0058012
PC160_160	0.850234	623	0.000657895	yes	0.0446275			623	…	0.0446275					TG511NL170	0.0427611	-0.0113596	-0.0223445	-0.00037471
PC140_226	0.85095	624	0.000666667	yes	0.0446991			624	…	0.0446991					TG512NL150	0.658814	0.00259102	-0.0089718	0.0141538
TG546NL183	0.856735	625	0.000675676	yes	0.0447708			625	…	0.0447708					TG512NL170	0.408523	-0.00409763	-0.01386	0.00566473
CE180	0.858325	626	0.000684932	yes	0.0448424			626	…	0.0448424					TG512NL171	0.408523	-0.00409763	-0.01386	0.00566473
Sulfatided181180	0.858747	627	0.000694444	yes	0.044914			627	…	0.044914					TG521NL180	0.00104765	-0.0200363	-0.0318971	-0.00817556
LPE180sn1	0.858879	628	0.000704225	yes	0.0449857			628	…	0.0449857					TG521NL181	0.354923	0.0058102	-0.00655392	0.0181743
PEP180183	0.859492	629	0.000714286	yes	0.0450573			629	…	0.0450573					TG522NL160	0.480062	0.00474882	-0.00849573	0.0179934
LPE204sn2	0.860006	630	0.000724638	yes	0.0451289			630	…	0.0451289					TG522NL182	0.0307052	-0.0124977	-0.0238196	-0.00117578
PI385b	0.860385	631	0.000735294	yes	0.0452006			631	…	0.0452006					TG523NL161	0.0624535	0.0109989	-0.00057838	0.0225761
AC170a	0.860937	632	0.000746269	yes	0.0452722			632	…	0.0452722					TG523NL182	0.824267	0.00171121	-0.0134767	0.0168992
HexCerd181200	0.863341	633	0.000757576	yes	0.0453438			633	…	0.0453438					TG524NL161	0.00052651	0.0208314	0.009196	0.0324667
DG160_225	0.866633	634	0.000769231	yes	0.0454155			634	…	0.0454155					TG524NL182	0.0884123	0.0107001	-0.0016255	0.0230257
DG160_226	0.866736	635	0.00078125	yes	0.0454871			635	…	0.0454871					TG524NL183	0.522575	-0.00480682	-0.0196161	0.0100025
PCP352b	0.866737	636	0.000793651	yes	0.0455587			636	…	0.0455587					TG525NL183	0.912624	0.00072709	-0.0123332	0.0137874
PC182_205	0.866983	637	0.000806452	yes	0.0456304			637	…	0.0456304					TG525NL204	0.579124	-0.00270117	-0.0122957	0.00689334
DG181_183	0.867842	638	0.000819672	yes	0.045702			638	…	0.045702					TG525NL205	0.302046	-0.00458084	-0.0133158	0.00415413
PE15MHDA_226	0.873688	639	0.000833333	yes	0.0457736			639	…	0.0457736					TG532NL171	0.0291538	-0.0138133	-0.0262076	-0.00141894
PCO354	0.876019	640	0.000847458	yes	0.0458453			640	…	0.0458453					TG532NL181	0.600409	-0.00325621	-0.015504	0.00899162
TG568NL205	0.879566	641	0.000862069	yes	0.0459169			641	…	0.0459169					TG540NL180	0.00071806	-0.0244216	-0.0384142	-0.010429
HexCerd181180	0.881023	642	0.000877193	yes	0.0459885			642	…	0.0459885					TG541NL181	0.00127128	-0.0240462	-0.0385314	-0.00956102
Cerd201220	0.883118	643	0.000892857	yes	0.0460602			643	…	0.0460602					TG542NL180	0.0722104	-0.01308	-0.0273527	0.0011927
LPE160sn1	0.886213	644	0.000909091	yes	0.0461318			644	…	0.0461318					TG542NL201	0.807858	0.00149587	-0.0106271	0.0136188
PI385a	0.88736	645	0.000925926	yes	0.0462034			645	…	0.0462034					TG543NL181	0.0929387	0.00986516	-0.00166058	0.0213909
Hex2Cerd181200	0.89182	646	0.000943396	yes	0.0462751			646	…	0.0462751					TG543NL182	0.382442	-0.0064078	-0.0208523	0.00803676
DG160_161	0.893636	647	0.000961538	yes	0.0463467			647	…	0.0463467					TG544NL182	0.383	0.0057634	-0.00724383	0.0187706
PC330b	0.89428	648	0.000980392	yes	0.0464183			648	…	0.0464183					TG544NL203	0.817332	-0.00145983	-0.0139163	0.0109966
PG342	0.897857	649	0.001	yes	0.04649			649	…	0.04649					TG545NL183	0.632707	-0.00340055	-0.0174205	0.0106194
Sphd181	0.898443	650	0.00102041	yes	0.0465616			650	…	0.0465616					TG545NL204	0.560152	-0.00383058	-0.0167834	0.00912222
PCO365	0.898753	651	0.00104167	yes	0.0466332			651	…	0.0466332					TG546NL183	0.856735	-0.00124888	-0.0148835	0.0123857
CE221	0.905256	652	0.00106383	yes	0.0467049			652	…	0.0467049					TG546NL204	0.504579	0.00480146	-0.00937164	0.0189745
PEP170226a	0.907608	653	0.00108696	yes	0.0467765			653	…	0.0467765					TG546NL205	0.96451	0.0002215	-0.00959052	0.0100335
LPC240sn1	0.90879	654	0.00111111	yes	0.0468481			654	…	0.0468481					TG546NL226	0.141789	-0.00642294	-0.0150128	0.00216694
PC160_180	0.911984	655	0.00113636	yes	0.0469198			655	…	0.0469198					TG547NL205	0.917123	-0.00053852	-0.0107388	0.0096618
TG525NL183	0.912624	656	0.00116279	yes	0.0469914			656	…	0.0469914					TG547NL226	0.71594	-0.00169936	-0.0109023	0.00750363
TG568NL204	0.91294	657	0.00119048	yes	0.047063			657	…	0.047063					TG566NL204	0.0172634	0.0160281	0.00287001	0.0291862
Cerd161160	0.913675	658	0.00121951	yes	0.0471347			658	…	0.0471347					TG566NL225a	0.71189	-0.00229986	-0.0145717	0.00997201
PC160_181	0.916467	659	0.00125	yes	0.0472063			659	…	0.0472063					TG566NL225b	0.71189	-0.00229986	-0.0145717	0.00997201
TG547NL205	0.917123	660	0.00128205	yes	0.0472779			660	…	0.0472779					TG567NL204	0.345311	0.00588832	-0.00639392	0.0181706
PI15MHDA_182PI170_182	0.918468	661	0.00131579	yes	0.0473496			661	…	0.0473496					TG567NL205	0.559323	0.00302898	-0.00719165	0.0132496
PE180_204	0.918471	662	0.00135135	yes	0.0474212			662	…	0.0474212					TG567NL225a	0.97755	-0.00019562	-0.013897	0.0135058
PEP170226b	0.919594	663	0.00138889	yes	0.0474928			663	…	0.0474928					TG567NL225b	0.997502	2.176e-05	-0.0136807	0.0137242
LPE181sn2	0.920081	664	0.00142857	yes	0.0475645			664	…	0.0475645					TG567NL226	0.285217	0.00529913	-0.00445817	0.0150564
LPC150sn1	0.926057	665	0.00147059	yes	0.0476361			665	…	0.0476361					TG568NL204	0.91294	-0.00065689	-0.0124993	0.0111855
PC160_203a	0.927635	666	0.00151515	yes	0.0477077			666	…	0.0477077					TG568NL205	0.879566	0.00076683	-0.00920826	0.0107419
PEP180203a	0.927815	667	0.0015625	yes	0.0477794			667	…	0.0477794					TG568NL226	0.263453	0.00607487	-0.00461304	0.0167628
TGO522NL171	0.929462	668	0.0016129	yes	0.047851			668	…	0.047851					TG569NL226	0.515751	0.00321944	-0.00653846	0.0129773
PI180_203a	0.929739	669	0.00166667	yes	0.0479226			669	…	0.0479226					TG5810NL226	0.802742	0.00122211	-0.00842013	0.0108644
Sulfatided181240OH	0.93228	670	0.00172414	yes	0.0479943			670	…	0.0479943					TG588NL226	0.195374	0.00621501	-0.00322242	0.0156524
TGO502NL161	0.932296	671	0.00178571	yes	0.0480659			671	…	0.0480659					TG589NL226	0.254068	0.00590734	-0.00428225	0.0160969
PC366a	0.936295	672	0.00185185	yes	0.0481375			672	…	0.0481375					TGO501NL150	0.276967	-0.00587491	-0.0165079	0.00475804
AC160	0.939078	673	0.00192308	yes	0.0482092			673	…	0.0482092					TGO501NL160	0.452286	-0.00379317	-0.0137323	0.00614594
AC120	0.940658	674	0.002	yes	0.0482808			674	…	0.0482808					TGO501NL171	0.482766	-0.0038799	-0.014768	0.00700824
LPI181sn2	0.9409	675	0.00208333	yes	0.0483524			675	…	0.0483524					TGO501NL181	0.205992	-0.00598939	-0.0153023	0.00332354
PE160_226	0.941005	676	0.00217391	yes	0.0484241			676	…	0.0484241					TGO502NL161	0.932296	0.00048554	-0.0107792	0.0117503
SMd180140	0.945035	677	0.00227273	yes	0.0484957			677	…	0.0484957					TGO502NL181	0.797947	-0.00147904	-0.0128654	0.00990736
PEO180204	0.945408	678	0.00238095	yes	0.0485673			678	…	0.0485673					TGO502NL182	0.652851	-0.00316273	-0.0170177	0.0106923
TGO522NL160	0.945959	679	0.0025	yes	0.048639			679	…	0.048639					TGO503NL182	0.541556	0.00389447	-0.00867306	0.016462
PC160_205	0.950377	680	0.00263158	yes	0.0487106			680	…	0.0487106					TGO520NL160	0.00432061	-0.0182692	-0.0307372	-0.0058012
HexCerd161220	0.950474	681	0.00277778	yes	0.0487822			681	…	0.0487822					TGO521NL160	0.114778	-0.008919	-0.0200255	0.00218748
Cerd191160	0.953269	682	0.00294118	yes	0.0488539			682	…	0.0488539					TGO521NL181	0.0664757	-0.00977544	-0.0202227	0.00067183
Cerd191180	0.957594	683	0.003125	yes	0.0489255			683	…	0.0489255					TGO522NL160	0.945959	0.00039003	-0.0109517	0.0117318
Sulfatided181241OH	0.959253	684	0.00333333	yes	0.0489971			684	…	0.0489971					TGO522NL171	0.929462	-0.00053584	-0.0124669	0.0113953
TG546NL205	0.96451	685	0.00357143	yes	0.0490688			685	…	0.0490688					TGO522NL181	0.760798	0.00167893	-0.00918979	0.0125477
LPE181sn1	0.967504	686	0.00384615	yes	0.0491404			686	…	0.0491404					TGO542NL171	0.707971	0.00240338	-0.0102406	0.0150474
PC181_181	0.970742	687	0.00416667	yes	0.049212			687	…	0.049212					TGO542NL181	0.66724	-0.00264049	-0.0147425	0.00946149
PC385b	0.971037	688	0.00454545	yes	0.0492837			688	…	0.0492837					TGO543NL171	0.289875	0.00665119	-0.00571499	0.0190174
HexCerd182180	0.971574	689	0.005	yes	0.0493553			689	…	0.0493553					TGO543NL181	0.114163	0.00956182	-0.00232478	0.0214484
TG567NL225a	0.97755	690	0.00555556	yes	0.0494269			690	…	0.0494269					TGO544NL171	0.364725	0.00560588	-0.00656998	0.0177817
HexCerd181240	0.98662	691	0.00625	yes	0.0494986			691	…	0.0494986					TGO544NL182	0.226101	0.00790207	-0.00493758	0.0207417
PEP181182b	0.987962	692	0.00714286	yes	0.0495702			692	…	0.0495702					Ubiquinone	0.369115	0.00548107	-0.00653352	0.0174957
HexCerd161200	0.989769	693	0.00833333	yes	0.0496418			693	…	0.0496418					dhCerd180160	0.696717	-0.00264525	-0.0160197	0.0107292
CE162	0.991597	694	0.01	yes	0.0497135			694	…	0.0497135					dhCerd180180	0.508233	0.00385193	-0.0076166	0.0153205
TG503NL182	0.994691	695	0.0125	yes	0.0497851			695	…	0.0497851					dhCerd180200	0.187993	0.00861714	-0.0042512	0.0214855
PE181_181	0.996206	696	0.0166667	yes	0.0498567			696	…	0.0498567					dhCerd180220	0.408612	0.00496751	-0.00686953	0.0168045
TG567NL225b	0.997502	697	0.025	yes	0.0499284			697	…	0.0499284					dhCerd180240	0.451021	0.00494701	-0.00797923	0.0178732
PE200_204	0.999756	698	0.05	yes	0.05			698	…	0.05					dhCerd180241	0.544345	0.00335082	-0.00753745	0.0142391

## Sheet: lipids_v1
Lipid DV	B	95% LL	95% UL	p-value
z_AC120_v1	-0.00409125	-0.0164854	0.00830287	0.515733
z_AC130_v1	0.00809583	-0.00491909	0.0211107	0.221327
z_AC140_v1	-0.00957554	-0.021918	0.00276687	0.127589
z_AC141_v1	-0.0135324	-0.0241219	-0.00294293	0.0125372
z_AC142_v1	-0.00619711	-0.0188364	0.00644221	0.334684
z_AC150a_v1	0.00818942	-0.00414405	0.0205229	0.191839
z_AC150b_v1	-0.00430199	-0.0194876	0.0108836	0.576934
z_AC160_v1	-0.0187194	-0.0332206	-0.00421815	0.0116832
z_AC161_v1	-0.0161993	-0.0281629	-0.0042358	0.0082233
z_AC170a_v1	-0.00336696	-0.0187951	0.0120612	0.667323
z_AC170b_v1	-0.000148605	-0.015879	0.0155818	0.985151
z_AC180_v1	-0.00939983	-0.0241499	0.00535022	0.210267
z_AC181_v1	-0.021176	-0.0343663	-0.00798573	0.00179771
z_AC182_v1	-0.0140397	-0.0270903	-0.000989188	0.0351316
z_CE140_v1	0.01324	-0.000364351	0.0268445	0.0563931
z_CE150_v1	0.0087351	-0.00456955	0.0220397	0.19686
z_CE160_v1	-0.000352065	-0.015819	0.0151148	0.964233
z_CE161_v1	0.00301142	-0.00858945	0.0146123	0.609199
z_CE162_v1	0.014335	-9.16451e-05	0.0287617	0.0514582
z_CE170_v1	0.00440256	-0.00903379	0.0178389	0.518832
z_CE171_v1	0.0034475	-0.00880649	0.0157015	0.579566
z_CE180_v1	-0.00267852	-0.0165033	0.0111462	0.702745
z_CE181_v1	-0.00726668	-0.0220589	0.00752557	0.333756
z_CE182_v1	-0.00724577	-0.0233531	0.00886156	0.376004
z_CE183_v1	0.00254097	-0.0088442	0.0139262	0.660252
z_CE200_v1	-0.00514295	-0.0174297	0.00714381	0.410004
z_CE201_v1	-0.00900202	-0.0219776	0.00397359	0.172769
z_CE202_v1	-0.00814683	-0.0209124	0.0046187	0.209615
z_CE203_v1	-0.0082423	-0.021472	0.00498744	0.22061
z_CE204_v1	0.0105365	-0.00423835	0.0253113	0.161144
z_CE205_v1	0.0163038	0.0015383	0.0310692	0.0306373
z_CE220_v1	-0.00506968	-0.0160864	0.00594706	0.365157
z_CE221_v1	-0.00649137	-0.0174158	0.00443307	0.242612
z_CE224_v1	-0.00706536	-0.0200952	0.00596453	0.286143
z_CE225n3_v1	0.0059666	-0.00740337	0.0193366	0.3798
z_CE225n6_v1	0.000792677	-0.0122781	0.0138634	0.904902
z_CE226_v1	0.00338447	-0.00955174	0.0163207	0.606389
z_CE240_v1	-0.00963592	-0.0196339	0.000362042	0.0588016
z_CE241_v1	-0.0053301	-0.0179881	0.00732793	0.407221
z_CE244_v1	-0.0113149	-0.0231449	0.000515038	0.0607314
z_CE245_v1	-0.00413828	-0.01661	0.00833347	0.513555
z_CE246_v1	0.0109925	-0.00160282	0.0235879	0.0867811
z_Cerd161160_v1	0.00996833	-0.00381648	0.0237531	0.15538
z_Cerd161180_v1	-0.0014525	-0.0147528	0.0118478	0.829666
z_Cerd161200_v1	-0.00340484	-0.016514	0.00970434	0.609001
z_Cerd161220_v1	0.00271063	-0.0109034	0.0163247	0.694936
z_Cerd161230_v1	0.00734773	-0.00606848	0.0207639	0.281357
z_Cerd161240_v1	0.0106705	-0.00275078	0.0240918	0.11848
z_Cerd161241_v1	0.00697863	-0.00628422	0.0202415	0.300606
z_Cerd171160_v1	0.000353727	-0.014409	0.0151164	0.962351
z_Cerd171180_v1	0.00380142	-0.0114293	0.0190321	0.623043
z_Cerd171200_v1	-0.000583526	-0.0142471	0.01308	0.932951
z_Cerd171220_v1	-0.00211542	-0.0161778	0.0119469	0.766985
z_Cerd171230_v1	0.00364043	-0.00952736	0.0168082	0.586144
z_Cerd171240_v1	0.00390032	-0.00963237	0.017433	0.570339
z_Cerd171241_v1	0.00120638	-0.0130076	0.0154204	0.867216
z_Cerd181140_v1	-0.0041388	-0.0169794	0.00870177	0.525658
z_Cerd181160_v1	-0.00486195	-0.0196621	0.00993816	0.517753
z_Cerd181170_v1	-0.00591052	-0.0198205	0.00799946	0.402978
z_Cerd181180_v1	-0.0108049	-0.0248425	0.00323281	0.130602
z_Cerd181190_v1	-0.0176899	-0.0300892	-0.00529073	0.00540714
z_Cerd181200_v1	-0.0156355	-0.0295396	-0.00173144	0.0277306
z_Cerd181210_v1	-0.0106631	-0.0248218	0.00349564	0.139051
z_Cerd181220_v1	-0.0104972	-0.0260965	0.00510217	0.185969
z_Cerd181230_v1	0.000694223	-0.0136766	0.015065	0.924182
z_Cerd181240_v1	-0.007986	-0.0217002	0.00572824	0.252135
z_Cerd181241_v1	-0.00516857	-0.0187201	0.00838295	0.452765
z_Cerd181260_v1	-0.00347633	-0.0167668	0.00981411	0.606473
z_Cerd182140_v1	-0.00724846	-0.0190785	0.00458155	0.228301
z_Cerd182160_v1	-0.0116624	-0.0260638	0.00273899	0.111837
z_Cerd182170_v1	0.00507155	-0.0078005	0.0179436	0.438004
z_Cerd182180_v1	-0.0127807	-0.0265193	0.000958015	0.06807
z_Cerd182210_v1	-0.00714641	-0.0192561	0.00496332	0.245841
z_Cerd182220_v1	-0.0104828	-0.0250555	0.00408988	0.157547
z_Cerd182230_v1	-0.00312002	-0.0168846	0.0106445	0.655285
z_Cerd182240_v1	-0.00444715	-0.0181487	0.00925436	0.522774
z_Cerd182241_v1	-0.006065	-0.0196208	0.00749084	0.378587
z_Cerd182260_v1	-0.00136212	-0.015372	0.0126478	0.848111
z_Cerd191160_v1	0.00188206	-0.0123863	0.0161504	0.794992
z_Cerd191180_v1	0.00593711	-0.008118	0.0199922	0.405741
z_Cerd191200_v1	-0.00319369	-0.0171044	0.010717	0.651147
z_Cerd191220_v1	0.00535749	-0.00747623	0.0181912	0.411259
z_Cerd191230_v1	0.00777299	-0.00527443	0.0208204	0.241396
z_Cerd191240_v1	0.00465795	-0.00826489	0.0175808	0.477945
z_Cerd191241_v1	0.00384984	-0.00988443	0.0175841	0.580951
z_Cerd191260_v1	0.000351688	-0.012743	0.0134464	0.957804
z_Cerd201220_v1	-0.00116352	-0.0193301	0.0170031	0.899595
z_Cerd201230_v1	0.000913066	-0.0159589	0.017785	0.915097
z_Cerd201240_v1	-0.00157177	-0.0179996	0.0148561	0.850501
z_Cerd201241_v1	-0.0020456	-0.0176309	0.0135397	0.795983
z_Cerd201260_v1	0.000650157	-0.0110804	0.0123807	0.913054
z_Cerm180200_v1	-0.00450111	-0.0177091	0.00870692	0.502246
z_Cerm180220_v1	-0.00246786	-0.0158948	0.0109591	0.717331
z_Cerm180230_v1	0.0027022	-0.00994088	0.0153453	0.673786
z_Cerm180240_v1	-0.00111428	-0.0140739	0.0118453	0.865498
z_Cerm180241_v1	-0.00294145	-0.0158863	0.0100034	0.654491
z_Cerm181180_v1	-0.00234592	-0.0154018	0.0107099	0.723396
z_Cerm181200_v1	-0.0163337	-0.0296792	-0.00298829	0.0167206
z_Cerm181220_v1	-0.00641034	-0.0189927	0.00617198	0.316181
z_Cerm181230_v1	0.000599025	-0.011723	0.0129211	0.923703
z_Cerm181240_v1	-0.00364273	-0.0160762	0.00879075	0.563993
z_Cerm181241_v1	-0.00457936	-0.0170272	0.00786847	0.468918
z_Cer1Pd181160_v1	-0.00420429	-0.0156057	0.00719708	0.46787
z_COH_v1	-0.00806521	-0.0243814	0.00825094	0.330762
z_DE160_v1	-0.00431995	-0.0168522	0.00821231	0.497348
z_DE181_v1	-0.00381555	-0.0156869	0.00805583	0.526833
z_DE182_v1	0.000395389	-0.0135279	0.0143187	0.955386
z_DE204_v1	0.0135749	-0.000857571	0.0280074	0.0650978
z_DE205_v1	0.00985435	-0.00684925	0.026558	0.245988
z_DE226_v1	0.00275788	-0.00943147	0.0149472	0.655879
z_DG140_160_v1	0.000679961	-0.0117587	0.0131186	0.914241
z_DG160_160_v1	-0.00245407	-0.0161224	0.0112143	0.7236
z_DG160_161_v1	-0.00294308	-0.0150598	0.00917367	0.632391
z_DG140_182_v1	-0.00105729	-0.0136979	0.0115833	0.869123
z_DG160_181_v1	-0.00717798	-0.0213683	0.00701237	0.319638
z_DG161_181_v1	-0.0108737	-0.0231244	0.00137707	0.0815904
z_DG160_182_v1	-0.00327661	-0.0187867	0.0122335	0.677346
z_DG180_181_v1	-0.00659299	-0.0205398	0.00735383	0.352262
z_DG181_181_v1	-0.0127813	-0.0251098	-0.000452728	0.0422382
z_DG180_182_v1	-0.000461052	-0.0149357	0.0140136	0.949965
z_DG181_182_v1	-0.0112791	-0.0249775	0.00241939	0.105997
z_DG182_182_v1	-0.00621453	-0.0200555	0.00762645	0.376902
z_DG181_183_v1	-0.00936481	-0.021814	0.00308437	0.139504
z_DG160_204_v1	-0.00449161	-0.0145543	0.0055711	0.379701
z_DG181_203_v1	-0.00994718	-0.0216352	0.00174083	0.0948425
z_DG180_204_v1	-0.00443436	-0.0176202	0.00875144	0.507885
z_DG181_204_v1	-0.00853277	-0.0188364	0.0017709	0.104012
z_DG160_225_v1	-0.00299389	-0.0156467	0.00965892	0.641206
z_DG182_204_v1	-0.00491661	-0.0151919	0.00535867	0.346433
z_DG160_226_v1	0.00355203	-0.0111989	0.018303	0.635325
z_DG181_205_v1	0.00930805	-0.00350932	0.0221254	0.153639
z_DG182_226_v1	0.00159162	-0.0114641	0.0146473	0.810214
z_dhCerd180160_v1	-0.00246764	-0.0161375	0.0112022	0.722167
z_dhCerd180180_v1	-0.0048476	-0.0196379	0.00994267	0.518711
z_dhCerd180200_v1	-0.0139446	-0.0300759	0.00218682	0.089801
z_dhCerd180220_v1	-0.00280558	-0.0209944	0.0153833	0.761253
z_dhCerd180240_v1	0.00411183	-0.0117231	0.0199467	0.609085
z_dhCerd180241_v1	-0.00149862	-0.016381	0.0133837	0.842757
z_GM1d181160_v1	-0.00376244	-0.017742	0.0102172	0.596103
z_GM3d181160_v1	-0.00751276	-0.0220814	0.00705591	0.310336
z_GM3d181180_v1	-0.00355169	-0.0165324	0.00942897	0.590009
z_GM3d181200_v1	-0.01384	-0.0250301	-0.00264983	0.0156236
z_GM3d181220_v1	-0.00826825	-0.0215291	0.00499264	0.220246
z_GM3d181240_v1	0.000473702	-0.0113909	0.0123383	0.937307
z_GM3d181241_v1	-0.000361647	-0.0137113	0.012988	0.957438
z_HexCerd161180_v1	-0.00430585	-0.016877	0.00826531	0.500079
z_HexCerd161200_v1	-0.000636522	-0.0123235	0.0110504	0.914555
z_HexCerd161220_v1	-0.00223118	-0.0154488	0.0109865	0.739512
z_HexCerd161240_v1	0.000284787	-0.0124022	0.0129718	0.964728
z_HexCerd181160_v1	-0.00286531	-0.0165468	0.0108162	0.679979
z_HexCerd181180_v1	-0.00192521	-0.0147684	0.010918	0.767783
z_HexCerd181200_v1	-0.0085941	-0.0219807	0.00479254	0.206918
z_HexCerd181220_v1	-0.0113805	-0.0252219	0.00246087	0.106492
z_HexCerd181240_v1	-0.00584776	-0.0185783	0.00688274	0.36602
z_HexCerd181241_v1	-0.00308851	-0.0167384	0.0105614	0.655861
z_HexCerd182180_v1	-0.00455961	-0.0195868	0.0104676	0.550191
z_HexCerd182200_v1	-0.0080996	-0.0224419	0.00624273	0.266689
z_HexCerd182220_v1	-0.0127897	-0.0258468	0.000267507	0.0548319
z_HexCerd182240_v1	-0.0108828	-0.022656	0.000890496	0.0698224
z_Hex2Cerd161160_v1	0.0084693	-0.00406594	0.0210045	0.184208
z_Hex2Cerd161241_v1	0.00104224	-0.0118324	0.0139169	0.873294
z_Hex2Cerd181160_v1	0.00247485	-0.0111024	0.0160521	0.719568
z_Hex2Cerd181180_v1	0.00204371	-0.0101556	0.014243	0.741409
z_Hex2Cerd181200_v1	-0.00852179	-0.023209	0.0061654	0.25384
z_Hex2Cerd181220_v1	-0.00584501	-0.0215632	0.00987318	0.464131
z_Hex2Cerd181240_v1	-0.00750401	-0.0208974	0.00588934	0.270468
z_Hex2Cerd181241_v1	0.000690966	-0.0127477	0.0141297	0.91932
z_Hex2Cerd182160_v1	-0.00407973	-0.0166812	0.00852171	0.523827
z_Hex2Cerd182241_v1	-0.00193209	-0.0155698	0.0117056	0.780189
z_Hex3Cerd181160_v1	-0.00970737	-0.0237696	0.00435481	0.174902
z_Hex3Cerd181180_v1	-0.00225834	-0.0155978	0.0110811	0.738775
z_Hex3Cerd181200_v1	-0.00345716	-0.0159476	0.00903331	0.585712
z_Hex3Cerd181220_v1	-0.00720131	-0.0212019	0.0067993	0.311576
z_Hex3Cerd181240_v1	0.00254918	-0.0112117	0.0163101	0.7152
z_Hex3Cerd181241_v1	-0.00215197	-0.0161926	0.0118886	0.762723
z_LPC140sn2_v1	0.00466707	-0.00789884	0.017233	0.464677
z_LPC140sn1_v1	0.00444766	-0.00781517	0.0167105	0.475204
z_LPC150sn2_v1	0.00740529	-0.00627798	0.0210886	0.287074
z_LPC150sn1_v1	0.00494011	-0.00881192	0.0186921	0.479429
z_LPC160sn2_v1	0.00443298	-0.0104802	0.0193461	0.558323
z_LPC160sn1_v1	0.00319602	-0.0121062	0.0184982	0.680801
z_LPC161sn2_v1	-0.00164086	-0.014131	0.0108492	0.795799
z_LPC161sn1_v1	-0.000698148	-0.0140234	0.0126271	0.917793
z_LPC15MHDAsn2_v1	0.00861347	-0.00547292	0.0226999	0.229243
z_LPC15MHDAsn1LPC170_v1	0.00638111	-0.00782146	0.0205837	0.376587
z_LPC15MHDAsn1104_sn1_v1	0.00691626	-0.00673747	0.02057	0.318959
z_LPC170sn1_v1	0.00437969	-0.0101981	0.0189574	0.554121
z_LPC171sn2a_v1	0.0078268	-0.00518188	0.0208355	0.236776
z_LPC171sn1aLPC171_v1	0.00581211	-0.00764007	0.0192643	0.39513
z_LPC171asn1104_sn1_v1	0.00626078	-0.00697076	0.0194923	0.351807
z_LPC171sn1b_v1	0.0146646	0.00327737	0.0260518	0.011882
z_LPC180sn2_v1	-0.00138247	-0.0173853	0.0146204	0.864866
z_LPC180sn1_v1	-0.000221385	-0.0158752	0.0154324	0.977773
z_LPC181sn2_v1	0.00201335	-0.011965	0.0159917	0.776624
z_LPC181sn1_v1	0.000569986	-0.0135285	0.0146684	0.936519
z_LPC182sn2_v1	0.00482	-0.010545	0.020185	0.53678
z_LPC182sn1_v1	0.00844508	-0.00675544	0.0236456	0.274494
z_LPC183sn2a_v1	0.00304794	-0.00824019	0.0143361	0.594909
z_LPC183sn1aLPC183s_v1	0.00190789	-0.010802	0.0146178	0.767467
z_LPC183asn1104_sn1_v1	0.00487663	-0.00679265	0.0165459	0.410768
z_LPC183sn1b_v1	0.000364763	-0.0126306	0.0133601	0.955902
z_LPC190sn2a_v1	0.00645635	-0.00665982	0.0195725	0.332771
z_LPC190sn1aLPC190_v1	0.00544075	-0.00937508	0.0202566	0.469713
z_LPC190asn1104_sn1_v1	0.0117417	-0.00176605	0.0252494	0.088037
z_LPC190sn1b_v1	0.00231446	-0.0123637	0.0169926	0.756107
z_LPC191a_v1	0.00783105	-0.00427514	0.0199372	0.203507
z_LPC191b_v1	0.00782468	-0.00499628	0.0206456	0.230125
z_LPC191c_v1	0.0103408	-0.00221449	0.0228962	0.10589
z_LPC200sn2_v1	-0.0023415	-0.0149426	0.0102596	0.714355
z_LPC200sn1_v1	-0.00441128	-0.0167995	0.00797692	0.483263
z_LPC201sn2_v1	0.000548663	-0.0129066	0.0140039	0.935972
z_LPC201sn1_v1	-0.00571835	-0.0198143	0.00837764	0.424574
z_LPC202sn2_v1	-0.00129572	-0.0156081	0.0130166	0.858454
z_LPC202sn1_v1	-0.000456757	-0.0150879	0.0141744	0.95096
z_LPC203sn2_v1	-0.00603481	-0.0187115	0.00664189	0.348886
z_LPC203sn1_v1	-0.00297601	-0.0160577	0.0101057	0.654115
z_LPC204sn2_v1	-0.0059116	-0.0213988	0.00957562	0.452403
z_LPC204sn1_v1	-0.00261922	-0.0177642	0.0125258	0.733366
z_LPC205sn2_v1	0.00905371	-0.0069922	0.0250996	0.267108
z_LPC205sn1_v1	0.00984552	-0.0055033	0.0251943	0.207306
z_LPC220sn2_v1	-0.00182075	-0.0137153	0.0100738	0.763008
z_LPC220sn1_v1	3.44571e-05	-0.0120364	0.0121053	0.995513
z_LPC221sn2_v1	0.00132559	-0.011851	0.0145021	0.8429
z_LPC221sn1_v1	0.00146499	-0.010982	0.013912	0.816647
z_LPC224sn2_v1	-0.00371194	-0.0161851	0.00876123	0.557873
z_LPC224sn1_v1	-0.00275228	-0.0155565	0.0100519	0.672031
z_LPC225sn2n3_v1	0.0016718	-0.0117571	0.0151007	0.806274
z_LPC225sn1n3LPC225_v1	-0.00175014	-0.0151804	0.0116801	0.797411
z_LPC225n3sn1104_sn1_v1	0.000309556	-0.0131304	0.0137495	0.963808
z_LPC225sn1n6_v1	-0.00451269	-0.0167422	0.00771687	0.467575
z_LPC226sn2_v1	0.00258358	-0.0116883	0.0168555	0.721416
z_LPC226sn1_v1	0.00114325	-0.0126996	0.0149861	0.870759
z_LPC240sn2_v1	-0.00343114	-0.0167346	0.00987228	0.611505
z_LPC240sn1_v1	-0.00459776	-0.0174542	0.00825872	0.481393
z_LPC260sn2_v1	0.00135948	-0.0119336	0.0146525	0.840335
z_LPC260sn1_v1	7.4243e-05	-0.0111197	0.0112682	0.989575
z_LPCO160_v1	0.000839596	-0.0139488	0.015628	0.910946
z_LPCO180_v1	0.00181457	-0.0118574	0.0154865	0.79375
z_LPCO181_v1	-0.0038943	-0.0182034	0.0104148	0.591991
z_LPCO200_v1	0.00166601	-0.0108588	0.0141908	0.793302
z_LPCO201_v1	0.00868915	-0.00471483	0.0220931	0.20255
z_LPCO220_v1	-0.00205546	-0.0148132	0.0107022	0.75097
z_LPCO221_v1	0.00606124	-0.00647306	0.0185955	0.341347
z_LPCO240_v1	-0.000327236	-0.0123845	0.01173	0.95736
z_LPCO241_v1	0.0028902	-0.00965611	0.0154365	0.650045
z_LPCO242_v1	0.00218764	-0.01187	0.0162453	0.759195
z_LPCP160_v1	0.00052471	-0.0138747	0.0149241	0.942771
z_LPCP170a_v1	0.00909361	-0.00300507	0.0211923	0.139826
z_LPCP170b_v1	0.0110634	-0.00117162	0.0232983	0.0760742
z_LPCP180_v1	0.00683474	-0.0071843	0.0208538	0.337417
z_LPCP181_v1	0.00703552	-0.00525123	0.0193223	0.260089
z_LPCP200_v1	0.00347301	-0.0101489	0.0170949	0.615593
z_LPE160sn2_v1	0.00239581	-0.0123488	0.0171404	0.748921
z_LPE160sn1_v1	0.0024912	-0.0111926	0.016175	0.719898
z_LPE170sn2_v1	-0.011093	-0.025962	0.00377603	0.142774
z_LPE170sn1_v1	-0.00860271	-0.0225867	0.00538131	0.226444
z_LPE180sn2_v1	-0.00306682	-0.0178377	0.0117041	0.682583
z_LPE180sn1_v1	-0.00381977	-0.0184436	0.0108041	0.606975
z_LPE181sn2_v1	0.00335403	-0.0109726	0.0176807	0.644742
z_LPE181sn1_v1	0.00428737	-0.00957832	0.0181531	0.542624
z_LPE182sn2_v1	0.00552796	-0.00904417	0.0201001	0.455195
z_LPE182sn1_v1	0.00802007	-0.00621213	0.0222523	0.267718
z_LPE204sn2_v1	-0.00988909	-0.0239126	0.00413442	0.165845
z_LPE204sn1_v1	-0.00677694	-0.0193547	0.00580077	0.28919
z_LPE226sn2_v1	-0.00185377	-0.0151905	0.0114829	0.784235
z_LPE226sn1_v1	-0.00103975	-0.014165	0.0120855	0.875988
z_LPEP160_v1	-0.00510162	-0.0212052	0.0110019	0.532768
z_LPEP180_v1	-0.00250732	-0.0184271	0.0134124	0.756381
z_LPEP181_v1	5.47416e-05	-0.0142321	0.0143416	0.993977
z_LPEP200_v1	0.00183735	-0.0119633	0.015638	0.793122
z_LPI180sn2_v1	-0.00776675	-0.0203851	0.00485156	0.226194
z_LPI180sn1_v1	-0.0111375	-0.0233163	0.0010413	0.0728323
z_LPI181sn2_v1	0.000356654	-0.0140412	0.0147545	0.961078
z_LPI181sn1_v1	0.00498083	-0.00951364	0.0194753	0.498682
z_LPI182sn2_v1	-0.00359747	-0.0161272	0.00893225	0.57181
z_LPI182sn1_v1	-0.00600027	-0.0253908	0.0133902	0.542316
z_LPI204sn2_v1	-0.0136415	-0.028332	0.00104905	0.0685643
z_LPI204sn1_v1	-0.00974931	-0.0273284	0.00782982	0.275341
z_PC280_v1	0.00612648	-0.00714034	0.0193933	0.363486
z_PC140_160_v1	0.00640337	-0.00632875	0.0191355	0.322418
z_PC310a_v1	0.0113629	-0.00071657	0.0234424	0.06507
z_PC310b_v1	0.00720451	-0.00655216	0.0209612	0.302883
z_PC160_160_v1	-0.00436214	-0.0180586	0.00933431	0.530591
z_PC321_v1	-0.00136635	-0.013059	0.0103263	0.817942
z_PC322_v1	0.00189175	-0.010232	0.0140155	0.758569
z_PC330a_v1	0.00886712	-0.00406543	0.0217997	0.177826
z_PC330b_v1	0.0057301	-0.00847213	0.0199323	0.427094
z_PC331_v1	0.00135411	-0.0114518	0.01416	0.834993
z_PC332_v1	0.00592018	-0.0075331	0.0193735	0.386457
z_PC160_180_v1	-0.000503159	-0.0167941	0.0157877	0.951482
z_PC160_181_v1	-0.00892552	-0.022822	0.00497097	0.206718
z_PC160_182_v1	-0.00698801	-0.0247012	0.0107252	0.437411
z_PC161_182_v1	-0.0070342	-0.0201416	0.00607315	0.291117
z_PC160_183a_v1	-0.00278256	-0.0137069	0.00814174	0.61593
z_PC160_183b_v1	-0.011509	-0.0237754	0.000757361	0.0657579
z_PC140_204_v1	-0.000845774	-0.0138309	0.0121394	0.897901
z_PC345_v1	0.00643925	-0.00810079	0.0209793	0.38344
z_PC15MHDA_181_v1	0.00120197	-0.011526	0.0139299	0.852419
z_PC170_181_v1	4.94187e-05	-0.013396	0.0134949	0.994223
z_PC15MHDA_182_v1	-0.0010797	-0.0142044	0.012045	0.871259
z_PC170_182_v1	0.00203513	-0.0121968	0.016267	0.778187
z_PC171_182_v1	-0.00099763	-0.0141623	0.0121671	0.881328
z_PC150_203_v1	-0.00270528	-0.0155074	0.0100968	0.677262
z_PC150_204_v1	0.00069206	-0.0131726	0.0145567	0.921667
z_PC355_v1	0.0115832	-0.00330389	0.0264704	0.126497
z_PC360_v1	-0.00377326	-0.0198466	0.0123001	0.643837
z_PC180_181_v1	-0.00782501	-0.0212463	0.00559623	0.251553
z_PC181_181_v1	-0.0088189	-0.0213001	0.00366233	0.165014
z_PC180_182_v1	-0.0106923	-0.027193	0.00580837	0.202731
z_PC181_182_v1	-0.00358406	-0.0175076	0.0103395	0.612202
z_PC160_203a_v1	-0.00813933	-0.0212195	0.00494086	0.221163
z_PC160_203b_v1	-0.00660057	-0.0190074	0.00580631	0.295307
z_PC182_182_v1	0.0101088	-0.00492544	0.025143	0.18632
z_PC160_204_v1	-0.014423	-0.0309265	0.00208048	0.0863547
z_PC161_204_v1	-0.00745078	-0.0199222	0.0050206	0.240076
z_PC160_205_v1	0.00666923	-0.00963715	0.0229756	0.420796
z_PC366a_v1	0.00842461	-0.00607922	0.0229284	0.253322
z_PC140_226_v1	0.00545773	-0.0074014	0.0183169	0.403517
z_PC15MHDA_204_v1	-0.000726235	-0.0145218	0.0130694	0.917402
z_PC170_204_v1	-0.00505557	-0.0190684	0.00895725	0.477532
z_PC150_226_v1	0.00726674	-0.00634495	0.0208784	0.293635
z_PC382_v1	-0.010303	-0.0237621	0.00315614	0.132703
z_PC180_203_v1	-0.0123685	-0.0251389	0.000401932	0.0575809
z_PC181_203_v1	-0.0145666	-0.027308	-0.00182524	0.0252701
z_PC384b_v1	-0.00734422	-0.0206378	0.00594939	0.277187
z_PC180_204_v1	-0.012048	-0.0268838	0.0027877	0.110836
z_PC385a_v1	-0.0140887	-0.0302139	0.00203645	0.0864359
z_PC385b_v1	0.00145434	-0.0139285	0.0168372	0.852253
z_PC386a_v1	0.00116594	-0.013699	0.0160309	0.877202
z_PC160_226_v1	-0.000953703	-0.0147763	0.0128689	0.891884
z_PC182_205_v1	0.0105377	-0.0053268	0.0264022	0.191691
z_PC161_226_v1	0.00137379	-0.0118839	0.0146315	0.838253
z_PC387c_v1	-0.00320234	-0.0165614	0.0101567	0.636853
z_PC395a_v1	0.00599848	-0.00658406	0.018581	0.348205
z_PC395b_v1	-0.000790943	-0.0150903	0.0135084	0.913228
z_PC15MHDA_226_v1	0.00626209	-0.00802421	0.0205484	0.38832
z_PC170_226_v1	0.0050814	-0.00906833	0.0192311	0.479565
z_PC4010_v1	0.00766705	-0.00608742	0.0214215	0.27291
z_PC180_224_v1	-0.008975	-0.0214455	0.00349551	0.157345
z_PC200_204_v1	-0.0174924	-0.0313179	-0.00366699	0.0134251
z_PC180_225n3PC201_204_v1	-0.00854733	-0.0233487	0.006254	0.256088
z_PC180_225n6_v1	-0.00560314	-0.0172918	0.00608551	0.345552
z_PC180_226_v1	-0.00457688	-0.0180454	0.00889167	0.503457
z_PC407a_v1	-0.00466909	-0.0183518	0.00901364	0.501678
z_PC181_226a_v1	-0.00901584	-0.0218964	0.00386477	0.168988
z_PC181_226b_v1	0.00339912	-0.0103476	0.0171458	0.626276
z_PC408_v1	0.000961954	-0.0127536	0.0146775	0.890108
z_PC4412_v1	0.00194629	-0.0114212	0.0153138	0.774262
z_PCO160160_v1	-0.0031466	-0.0182236	0.0119304	0.681028
z_PCO321_v1	-0.00204628	-0.0167398	0.0126472	0.783832
z_PCO322_v1	0.00558903	-0.00825355	0.0194316	0.42676
z_PCO341_v1	-0.00677974	-0.0217515	0.00819198	0.372842
z_PCO342_v1	0.00375858	-0.00853485	0.016052	0.547156
z_PCO344_v1	8.60619e-05	-0.013619	0.0137912	0.99013
z_PCO354_v1	0.00374267	-0.0101084	0.0175937	0.594642
z_PCO360_v1	-0.00859153	-0.0260472	0.0088641	0.332821
z_PCO180181_v1	0.00201043	-0.0113689	0.0153897	0.767236
z_PCO181181_v1	-0.00183049	-0.0159495	0.0122885	0.798423
z_PCO180182_v1	0.00213042	-0.0105137	0.0147746	0.739976
z_PCO181182_v1	-0.00226105	-0.0152454	0.0107233	0.731598
z_PCO160203_v1	0.000994431	-0.0126214	0.0146103	0.885597
z_PCO160204_v1	-0.00355226	-0.0177249	0.0106204	0.621578
z_PCO365_v1	0.00869526	-0.00668062	0.0240711	0.266032
z_PCO180204_v1	-0.00254108	-0.0161254	0.0110432	0.712537
z_PCO385_v1	-0.00559506	-0.0203719	0.00918182	0.456044
z_PCO160226_v1	0.00606568	-0.00803528	0.0201666	0.397204
z_PCO405_v1	0.00407936	-0.00913099	0.0172897	0.543155
z_PCO180226_v1	0.00547518	-0.00798762	0.018938	0.423415
z_PCO407a_v1	0.000374827	-0.0133656	0.0141153	0.957142
z_PCO407b_v1	-0.0077512	-0.0222925	0.00679009	0.294368
z_PCP160140_v1	0.000874188	-0.0127147	0.0144631	0.899153
z_PCP160160_v1	-0.00806071	-0.0221529	0.00603143	0.260604
z_PCP160161_v1	-0.00418539	-0.0175747	0.00920393	0.53822
z_PCP160181_v1	-0.00163426	-0.0148549	0.0115863	0.807613
z_PCP160182_v1	0.000740334	-0.0127815	0.0142622	0.914107
z_PCP160183_v1	0.00615199	-0.00599856	0.0183025	0.319182
z_PCP352a_v1	0.00565988	-0.00715958	0.0184793	0.384895
z_PCP352b_v1	0.0102046	-0.00306741	0.0234766	0.131011
z_PCP150204a_v1	0.00954705	-0.00279879	0.0218929	0.12882
z_PCP150204b_v1	0.0068967	-0.00608546	0.0198789	0.295999
z_PCP181181_v1	-0.000155565	-0.0131019	0.0127908	0.981114
z_PCP180182_v1	0.00754537	-0.00527114	0.0203619	0.246972
z_PCP363_v1	0.00197032	-0.0118024	0.0157431	0.778094
z_PCP160204_v1	-0.00199733	-0.0161456	0.0121509	0.780946
z_PCP160205_v1	0.0126658	-0.00228109	0.0276128	0.096265
z_PCP170204a_v1	0.00366747	-0.0102634	0.0175984	0.604144
z_PCP170204b_v1	0.0053665	-0.00841521	0.0191482	0.443367
z_PCP180204_v1	0.00244762	-0.0119113	0.0168065	0.73705
z_PCP385a_v1	-0.0037568	-0.0186614	0.0111478	0.619613
z_PCP385b_v1	0.00703135	-0.00776848	0.0218312	0.349855
z_PCP160226_v1	0.00389034	-0.00997938	0.0177601	0.580705
z_PCP200204_v1	-0.00263664	-0.0161301	0.0108569	0.700333
z_PCP180225_v1	0.00192122	-0.0123815	0.016224	0.791316
z_PCP180226_v1	0.00757442	-0.00666759	0.0218164	0.295463
z_PCP181226_v1	0.00264708	-0.012769	0.0180631	0.735195
z_PE160_160_v1	0.00199734	-0.0104915	0.0144862	0.752742
z_PE160_161_v1	-0.00197888	-0.0130434	0.00908568	0.724628
z_PE160_181_v1	-0.00424082	-0.0152841	0.0068024	0.449673
z_PE160_182_v1	-0.00321546	-0.0131283	0.00669743	0.523033
z_PE161_182_v1	0.000669577	-0.00989761	0.0112368	0.900658
z_PE160_183a_v1	-0.00108745	-0.0108863	0.00871139	0.826949
z_PE160_183b_v1	-0.00434163	-0.0155224	0.00683912	0.444631
z_PE15MHDA_181_v1	0.000773807	-0.011286	0.0128336	0.899412
z_PE170_181_v1	-0.00340875	-0.0153947	0.0085772	0.575454
z_PE15MHDA_182_v1	6.41683e-05	-0.011108	0.0112364	0.990972
z_PE170_182_v1	0.000385774	-0.0109536	0.0117252	0.946564
z_PE360_v1	-0.0052889	-0.0166453	0.00606755	0.359428
z_PE180_181_v1	-0.000133471	-0.0125581	0.0122912	0.983116
z_PE181_181_v1	-0.00238623	-0.0136667	0.0088942	0.676942
z_PE180_182_v1	-0.00291436	-0.0147088	0.00888012	0.626517
z_PE181_182_v1	0.00143698	-0.0106809	0.0135549	0.815298
z_PE160_203_v1	0.00126095	-0.0101147	0.0126366	0.82715
z_PE160_204_v1	-0.00784367	-0.0185273	0.00283993	0.149202
z_PE161_204_v1	-0.00248225	-0.0130098	0.00804531	0.642371
z_PE160_205_v1	0.00917036	-0.00494709	0.0232878	0.201633
z_PE15MHDA_204_v1	0.000169428	-0.0117618	0.0121007	0.977681
z_PE170_204_v1	-0.00715591	-0.018921	0.00460914	0.231711
z_PE180_203a_v1	-0.00754746	-0.0190038	0.00390892	0.195333
z_PE180_203b_v1	-0.00329697	-0.0150403	0.00844635	0.580343
z_PE180_204_v1	-0.0136089	-0.024992	-0.00222581	0.0193811
z_PE385a_v1	-0.011078	-0.0223527	0.000196747	0.0540918
z_PE385b_v1	0.00153966	-0.00996454	0.0130439	0.792061
z_PE160_226_v1	-0.00229685	-0.0144896	0.0098959	0.710604
z_PE15MHDA_226_v1	0.0088916	-0.00435471	0.0221379	0.187054
z_PE170_226_v1	0.00308228	-0.00913392	0.0152985	0.619251
z_PE180_224_v1	-0.00676276	-0.0172887	0.00376314	0.206576
z_PE200_204_v1	-0.012945	-0.0281709	0.00228082	0.0951706
z_PE180_225n3_v1	-0.00658576	-0.0189628	0.00579132	0.295231
z_PE180_225n6_v1	-0.00815069	-0.0190882	0.00278676	0.143221
z_PE180_226_v1	-0.00155737	-0.0142372	0.0111225	0.808821
z_PE181_226a_v1	-0.00288926	-0.0146598	0.00888131	0.628794
z_PE181_226b_v1	0.00314306	-0.00940812	0.0156942	0.621888
z_PEO341_v1	0.00688203	-0.00715832	0.0209224	0.334825
z_PEO160182_v1	0.00499168	-0.0076925	0.0176758	0.43854
z_PEO181182_v1	0.000629563	-0.0125956	0.0138547	0.925284
z_PEO160203_v1	0.00245924	-0.0114951	0.0164136	0.728485
z_PEO160204_v1	0.0007426	-0.0136627	0.0151479	0.91911
z_PEO365_v1	0.009309	-0.00676714	0.0253851	0.254789
z_PEO160224_v1	-0.00325115	-0.0164053	0.00990303	0.626422
z_PEO180204_v1	-0.0023936	-0.0161339	0.0113467	0.731499
z_PEO385a_v1	0.00169646	-0.0128428	0.0162357	0.818207
z_PEO385b_v1	0.00771299	-0.00702457	0.0224506	0.303199
z_PEO160226_v1	0.00772784	-0.00838135	0.023837	0.345201
z_PEO180225_v1	0.00972717	-0.00261075	0.0220651	0.121567
z_PEO180226_v1	0.00609893	-0.00910685	0.0213047	0.429812
z_PEO181226_v1	0.00579755	-0.00935855	0.0209536	0.45143
z_PEP150204a_v1	0.0108904	-0.000378997	0.0221599	0.0581339
z_PEP150204b_v1	0.00197966	-0.0107471	0.0147064	0.759298
z_PEP150226a_v1	0.0127019	-0.000741105	0.026145	0.0638933
z_PEP150226b_v1	0.00415176	-0.008673	0.0169765	0.523854
z_PEP160181_v1	0.000795402	-0.0113895	0.0129803	0.897677
z_PEP160182_v1	-9.42794e-05	-0.0126955	0.0125069	0.98824
z_PEP160183_v1	0.0139765	0.000574633	0.0273783	0.0410433
z_PEP160203a_v1	-0.00345773	-0.0157228	0.00880731	0.578785
z_PEP160203b_v1	-0.00755859	-0.0208393	0.00572215	0.262971
z_PEP160204_v1	-0.00465695	-0.0190855	0.00977156	0.525097
z_PEP160205_v1	0.0112073	-0.00402851	0.0264432	0.148427
z_PEP160224_v1	-0.0115747	-0.0275943	0.00444483	0.155722
z_PEP160225n3_v1	0.0014559	-0.0119113	0.0148231	0.830114
z_PEP160225n6_v1	-0.0106061	-0.0225602	0.00134797	0.0817097
z_PEP160226_v1	0.00267336	-0.0120203	0.0173671	0.720069
z_PEP170204a_v1	0.00667905	-0.00791378	0.0212719	0.367747
z_PEP170204b_v1	0.0011403	-0.0119278	0.0142084	0.86352
z_PEP170226a_v1	0.0136833	3.80151e-05	0.0273285	0.0493716
z_PEP170226b_v1	0.0121992	-0.00122173	0.0256201	0.0745649
z_PEP180181_v1	0.00192449	-0.0112916	0.0151406	0.774235
z_PEP180182_v1	0.00310445	-0.00961936	0.0158283	0.630859
z_PEP180183_v1	0.011606	-0.00276214	0.0259741	0.112742
z_PEP180203a_v1	0.00125361	-0.0110825	0.0135897	0.841334
z_PEP180203b_v1	0.00596063	-0.00708672	0.019008	0.368623
z_PEP180204_v1	0.000469665	-0.0135566	0.0144959	0.947405
z_PEP180205_v1	0.01352	-0.00119139	0.0282313	0.071441
z_PEP180224_v1	-0.0159345	-0.0361874	0.00431838	0.122333
z_PEP180225n3_v1	0.000718581	-0.0140991	0.0155363	0.923889
z_PEP180225n6_v1	-0.00538478	-0.0193049	0.0085353	0.446362
z_PEP180226_v1	0.00494621	-0.00974138	0.0196338	0.507302
z_PEP181181_v1	0.00266084	-0.0114393	0.016761	0.710118
z_PEP181181a_v1	0.00233944	-0.0119016	0.0165805	0.746253
z_PEP181181b_v1	0.00426717	-0.00794229	0.0164766	0.491386
z_PEP181182a_v1	0.00148652	-0.0116115	0.0145846	0.823093
z_PEP181182b_v1	0.0100726	-0.00234759	0.0224928	0.111318
z_PEP181183_v1	0.00113087	-0.01118	0.0134417	0.856399
z_PEP181203a_v1	0.00232003	-0.0108872	0.0155272	0.729335
z_PEP181203b_v1	0.00122078	-0.0125962	0.0150377	0.86182
z_PEP181204a_v1	-0.000323372	-0.0133536	0.0127069	0.961007
z_PEP181204b_v1	0.00590772	-0.00796774	0.0197832	0.402034
z_PEP181205a_v1	0.0114141	-0.00305798	0.0258863	0.121429
z_PEP181205b_v1	0.0126235	-0.00155777	0.0268047	0.0807201
z_PEP181224_v1	-0.0129326	-0.0274556	0.00159042	0.0806082
z_PEP181225a_v1	0.00126515	-0.0128752	0.0154055	0.860094
z_PEP181225b_v1	-0.00800452	-0.0217384	0.00572931	0.251706
z_PEP181226a_v1	0.00488939	-0.0094732	0.019252	0.502698
z_PEP181226b_v1	0.00940743	-0.00510674	0.0239216	0.20261
z_PEP190204a_v1	0.0127725	0.000484425	0.0250605	0.0417117
z_PEP190204b_v1	-0.000582977	-0.0133612	0.0121952	0.928384
z_PEP200181_v1	-0.000918602	-0.0151989	0.0133617	0.899159
z_PEP200182_v1	0.00235783	-0.0106061	0.0153218	0.720155
z_PEP200204_v1	-0.00531567	-0.0248386	0.0142073	0.591816
z_PEP200226_v1	0.00693379	-0.00718352	0.0210511	0.333838
z_PEP201204_v1	-0.00456835	-0.0143049	0.00516819	0.355847
z_PEP201226_v1	0.00549476	-0.00525167	0.0162412	0.314433
z_PG341_v1	-0.00688095	-0.0193885	0.00562656	0.2792
z_PG361_v1	0.000132168	-0.0125406	0.0128049	0.983607
z_PG362_v1	-0.00316216	-0.0159104	0.00958606	0.625191
z_SM_v1	-0.00689558	-0.0194013	0.00561016	0.278114
z_PG342_v1	0.00163258	-0.00802121	0.0112864	0.739051
z_SO_v1	-0.000503414	-0.0137449	0.0127381	0.940297
z_SP_v1	-0.000912193	-0.0140071	0.0121827	0.890849
z_PI160160_v1	0.00764946	-0.00438948	0.0196884	0.211611
z_PI160_161_v1	0.00490357	-0.00512701	0.0149342	0.336104
z_PI340_v1	0.00872959	-0.00397433	0.0214335	0.176875
z_PI341_v1	0.006261	-0.00510086	0.0176229	0.278409
z_PI15MHDA_181PI170_181_v1	0.0110457	-0.00186836	0.0239597	0.0932109
z_PI15MHDA_182PI170_182_v1	0.00796353	-0.0030299	0.018957	0.15467
z_PI180_181_v1	0.00921219	-0.00309941	0.0215238	0.141603
z_PI362_v1	-0.000313608	-0.0124246	0.0117974	0.959315
z_PI181_182_v1	0.00387025	-0.00884241	0.0165829	0.548857
z_PI160_203a_v1	0.003504	-0.00792713	0.0149351	0.546119
z_PI160_203b_v1	0.00588098	-0.00510147	0.0168634	0.292169
z_PI160_204_v1	-0.0061892	-0.0180415	0.00566314	0.304282
z_PI15MHDA_204PI170_204_v1	-0.0026464	-0.0150527	0.00975988	0.674388
z_PI376_v1	0.0090296	-0.0039527	0.0220119	0.171683
z_PI180_202_v1	0.00220816	-0.00845846	0.0128748	0.683465
z_PI180_203a_v1	-0.000813283	-0.0135695	0.011943	0.90005
z_PI180_203b_v1	-0.000474672	-0.0129868	0.0120375	0.940424
z_PI180_204_v1	-0.0057199	-0.0191125	0.00767272	0.400572
z_PI385a_v1	-0.00545849	-0.0179667	0.00704969	0.390413
z_PI385b_v1	0.00160213	-0.0102065	0.0134108	0.78927
z_PI386_v1	0.00711542	-0.00576828	0.0199991	0.277344
z_PI396_v1	0.00882144	-0.00443227	0.0220752	0.190793
z_PI180_224_v1	0.0023622	-0.0104756	0.0152	0.717029
z_PI200_204_v1	-0.00112859	-0.0127393	0.0104821	0.848143
z_PI180_225n3_v1	0.00864083	-0.00528396	0.0225656	0.222443
z_PI180_225n6_v1	0.00327204	-0.00786298	0.0144071	0.562832
z_PI180_226_v1	0.0120417	-0.00112098	0.0252043	0.0727277
z_PS361_v1	-0.0109183	-0.034584	0.0127475	0.363938
z_PS362_v1	-0.0029961	-0.020278	0.0142858	0.732738
z_PS383_v1	-0.0119347	-0.0295627	0.0056933	0.18331
z_PS384_v1	-0.0128036	-0.0301207	0.00451353	0.146369
z_PS385_v1	0.000988909	-0.0123739	0.0143517	0.884089
z_PS405_v1	-0.00520089	-0.0203608	0.00995903	0.499391
z_PS406_v1	-0.00219681	-0.0157577	0.0113641	0.749654
z_S1Pd161_v1	0.00419931	-0.00949233	0.017891	0.54589
z_S1Pd180_v1	-0.0134774	-0.0256006	-0.0013543	0.0295322
z_S1Pd181_v1	-0.00496402	-0.0177018	0.00777379	0.443
z_S1Pd182_v1	-0.00942117	-0.0224892	0.00364687	0.156638
z_SMd171140_v1	0.00562483	-0.00711259	0.0183622	0.384797
z_SMd180140_v1	0.0088603	-0.00434227	0.0220629	0.187156
z_SMd181140SMd161160_v1	0.00369797	-0.00941419	0.0168101	0.578639
z_SMd182140_v1	-0.0104141	-0.0224598	0.00163156	0.0897584
z_SMd171160_v1	0.00204295	-0.0118689	0.0159548	0.772377
z_SMd180160_v1	-0.00611008	-0.0224695	0.0102493	0.462181
z_SMd181160_v1	-0.0111668	-0.0262839	0.00395026	0.146734
z_SMd182160_v1	-0.0182341	-0.0315446	-0.00492352	0.0075155
z_SM343_v1	-0.00485783	-0.0175893	0.00787359	0.452576
z_SMd161190_v1	0.00498743	-0.00867393	0.0186488	0.472314
z_SMd181170SMd171180_v1	-0.00145825	-0.016595	0.0136785	0.84948
z_SMd182170_v1	-0.00622821	-0.020168	0.00771159	0.379242
z_SM352b_v1	-0.00200102	-0.0148432	0.0108412	0.758894
z_SMd181180SMd161200_v1	-0.0125611	-0.0271147	0.00199246	0.0902966
z_SMd182180_v1	-0.0177775	-0.0321867	-0.00336829	0.0158766
z_SMd182181_v1	-0.0141693	-0.0265504	-0.00178819	0.0251222
z_SM371_v1	-0.00632688	-0.020647	0.00799322	0.384561
z_SM372_v1	-0.0112149	-0.0249832	0.00255337	0.109771
z_SMd181200SMd161220_v1	-0.0113844	-0.0256413	0.0028724	0.116887
z_SMd182200_v1	-0.0197776	-0.034385	-0.00517024	0.00822848
z_SM383a_v1	-0.00763514	-0.0213673	0.00609698	0.274127
z_SM383b_v1	-0.00770722	-0.0211649	0.00575047	0.260023
z_SMd161230SMd171220_v1	0.00114197	-0.0125651	0.014849	0.869633
z_SMd180220_v1	-0.0040669	-0.0197081	0.0115743	0.608612
z_SMd181220SMd161240_v1	-0.0144744	-0.0307552	0.00180641	0.0810962
z_SMd161241_v1	0.000345781	-0.013343	0.0140345	0.960311
z_SMd182220_v1	-0.0182654	-0.0330553	-0.00347559	0.0157731
z_SM403a_v1	-0.00623889	-0.0204855	0.00800768	0.388758
z_SM403b_v1	-0.000212358	-0.0139006	0.0134759	0.975618
z_SM410_v1	-0.000241292	-0.0152327	0.0147501	0.974705
z_SM411a_v1	0.00173054	-0.0111961	0.0146572	0.792002
z_SMd181230SMd171240_v1	-0.00685977	-0.0205474	0.00682784	0.324114
z_SMd171241_v1	-0.000286223	-0.0140748	0.0135024	0.96738
z_SMd182230_v1	-0.00708186	-0.0211826	0.00701883	0.323086
z_SMd181240_v1	-0.0132092	-0.0281739	0.00175544	0.0832741
z_SMd181241_v1	-0.0133191	-0.0263249	-0.000313231	0.0447848
z_SMd182240_v1	-0.0103848	-0.0244229	0.00365326	0.146152
z_SM431_v1	0.00100411	-0.0132239	0.0152321	0.889429
z_SMd191241_v1	0.0037968	-0.0101454	0.017739	0.591761
z_SM432b_v1	-0.00205241	-0.0157121	0.0116072	0.767252
z_SM432c_v1	0.000414195	-0.0137109	0.0145393	0.953934
z_SM441_v1	-0.00275978	-0.0172421	0.0117226	0.707405
z_SM442_v1	-0.00688982	-0.021905	0.00812535	0.366534
z_SM443_v1	-0.00972452	-0.0241611	0.00471201	0.185526
z_Sphd161_v1	-0.00478714	-0.0177157	0.00814137	0.466035
z_Sphd181_v1	0.000894861	-0.0155006	0.0172903	0.914374
z_Sphd182_v1	-0.00774493	-0.0213833	0.00589342	0.264043
z_Sulfatided181160OH_v1	0.00285327	-0.0130282	0.0187348	0.72343
z_Sulfatided181160_v1	0.00513374	-0.00956426	0.0198317	0.491663
z_Sulfatided181180OH_v1	-0.00478157	-0.0172144	0.00765128	0.449
z_Sulfatided181180_v1	0.0155021	0.00296792	0.0280363	0.0156247
z_Sulfatided181240OH_v1	0.00780559	-0.00648154	0.0220927	0.282531
z_Sulfatided181240_v1	0.011285	-0.000461749	0.0230317	0.0596111
z_Sulfatided181241OH_v1	0.00629513	-0.00751962	0.0201099	0.369852
z_Sulfatided181241_v1	-0.00240689	-0.0147136	0.00989982	0.700078
z_TG480NL160_v1	0.00131936	-0.0104615	0.0131002	0.825392
z_TG480NL180_v1	0.00354821	-0.0092706	0.016367	0.585695
z_TG480SIM_v1	0.00148501	-0.0104456	0.0134156	0.806308
z_TG481NL161_v1	-0.00137639	-0.0118959	0.00914314	0.796607
z_TG481NL181_v1	0.00486412	-0.00865681	0.018385	0.478794
z_TG481SIM_v1	0.00762341	-0.00470396	0.0199508	0.224023
z_TG482NL140_v1	-0.00132859	-0.0125449	0.00988771	0.815499
z_TG482NL141_v1	0.00214827	-0.0104083	0.0147048	0.736118
z_TG482NL161_v1	-0.00133515	-0.0118865	0.00921622	0.803155
z_TG482NL182_v1	0.00502211	-0.00675472	0.0167989	0.401292
z_TG482SIM_v1	0.00148541	-0.0105646	0.0135355	0.808139
z_TG483NL140_v1	-0.0023816	-0.0135854	0.00882221	0.675454
z_TG483NL161_v1	-0.00291002	-0.0141501	0.00833008	0.61015
z_TG483NL183_v1	0.00392014	-0.00728854	0.0151288	0.491094
z_TG483SIM_v1	0.00170065	-0.0104267	0.013828	0.782367
z_TG491NL161_v1	-0.000293633	-0.0128392	0.0122519	0.963223
z_TG491NL171_v1	0.000571063	-0.0114158	0.0125579	0.925226
z_TG491SIM_v1	0.00479409	-0.00857831	0.0181665	0.48031
z_TG500NL180_v1	0.00128161	-0.0127983	0.0153615	0.857692
z_TG500SIM_v1	0.00196535	-0.0118474	0.0157781	0.779263
z_TG501NL140_v1	0.0126614	-0.0011442	0.026467	0.0720222
z_TG501NL160_v1	-0.00167768	-0.0135515	0.0101962	0.780765
z_TG501NL181_v1	0.00335337	-0.00933817	0.0160449	0.602828
z_TG501SIM_v1	-0.000700788	-0.0128163	0.0114148	0.909278
z_TG502NL140_v1	-0.00576056	-0.019271	0.00774986	0.401359
z_TG502NL161_v1	-0.0084614	-0.0201495	0.00322672	0.15493
z_TG502NL181_v1	-0.0072626	-0.0201889	0.00566367	0.269132
z_TG502NL182_v1	0.00382754	-0.00770305	0.0153581	0.513385
z_TG502SIM_v1	-0.00672275	-0.0189315	0.005486	0.278761
z_TG503NL140_v1	0.000354527	-0.0125697	0.0132787	0.956903
z_TG503NL141_v1	-0.0053049	-0.0193009	0.00869106	0.455575
z_TG503NL161_v1	-0.00838133	-0.0201188	0.00335611	0.160601
z_TG503NL182_v1	-0.00833251	-0.0203477	0.0036827	0.172934
z_TG503NL183_v1	-0.0019273	-0.0139289	0.0100743	0.751759
z_TG503SIM_v1	-0.00773491	-0.0194189	0.00394908	0.193175
z_TG504NL140_v1	-0.00394574	-0.0159863	0.0080948	0.518776
z_TG504NL183_v1	-0.00530944	-0.0164932	0.00587436	0.350212
z_TG504NL204_v1	-0.000852459	-0.0119949	0.01029	0.880201
z_TG504SIM_v1	-0.00540494	-0.0172384	0.00642853	0.368734
z_TG510NL160_v1	0.00031463	-0.0154001	0.0160294	0.968537
z_TG510SIM_v1	0.0138086	0.000641366	0.0269759	0.0399379
z_TG511NL170_v1	-0.000926826	-0.0151585	0.0133049	0.897916
z_TG511SIM_v1	0.000749935	-0.0138428	0.0153426	0.919359
z_TG512NL150_v1	-0.00608449	-0.0193888	0.0072198	0.368124
z_TG512NL170_v1	-0.00480081	-0.0174738	0.00787222	0.455824
z_TG512NL171_v1	-0.00480081	-0.0174738	0.00787222	0.455824
z_TG512SIM_v1	-0.00537928	-0.0189969	0.00823836	0.436814
z_TG521NL180_v1	0.00338238	-0.0115179	0.0182826	0.654815
z_TG521NL181_v1	-0.0126109	-0.0265961	0.00137435	0.0768875
z_TG521SIM_v1	0.000532998	-0.013625	0.014691	0.94088
z_TG522NL160_v1	-0.0140043	-0.0276582	-0.000350473	0.0444585
z_TG522NL182_v1	0.00989577	-0.00317837	0.0229699	0.137087
z_TG522SIM_v1	-0.0224472	-0.036392	-0.00850244	0.00174862
z_TG523NL161_v1	-0.00749375	-0.0196772	0.00468969	0.226523
z_TG523NL182_v1	-0.0135542	-0.0274158	0.000307333	0.0552461
z_TG523SIM_v1	-0.0169408	-0.03125	-0.00263162	0.0205744
z_TG524NL161_v1	-0.0189612	-0.0309278	-0.00699464	0.00205528
z_TG524NL182_v1	-0.0112123	-0.0244951	0.00207038	0.0975418
z_TG524NL183_v1	-0.0149556	-0.0280078	-0.00190342	0.0249467
z_TG524SIM_v1	-0.0179634	-0.0308459	-0.00508082	0.00652863
z_TG525NL183_v1	-0.00890204	-0.0202304	0.00242632	0.122786
z_TG525NL204_v1	-0.00358224	-0.0144781	0.00731359	0.517417
z_TG525NL205_v1	0.00381982	-0.00927286	0.0169125	0.565622
z_TG525SIM_v1	-0.00998154	-0.0222363	0.00227319	0.109789
z_TG532NL171_v1	-0.000845646	-0.0153662	0.013675	0.90866
z_TG532NL181_v1	-0.00726556	-0.0210382	0.00650712	0.299376
z_TG532SIM_v1	-0.00519708	-0.019113	0.00871883	0.462213
z_TG540NL180_v1	0.00501692	-0.00918195	0.0192158	0.48666
z_TG540SIM_v1	0.00571942	-0.00701577	0.0184546	0.376787
z_TG541NL181_v1	0.00618094	-0.00846703	0.0208289	0.406242
z_TG541SIM_v1	0.00525869	-0.0086825	0.0191999	0.457746
z_TG542NL180_v1	0.000481289	-0.0136819	0.0146445	0.946626
z_TG542NL201_v1	-0.00625527	-0.0179511	0.00544051	0.29276
z_TG542SIM_v1	-0.00134212	-0.0152974	0.0126132	0.849736
z_TG543NL181_v1	-0.00846261	-0.0202748	0.00334958	0.159228
z_TG543NL182_v1	-0.00468377	-0.0175494	0.00818183	0.473553
z_TG543SIM_v1	-0.0059141	-0.0185237	0.00669552	0.356044
z_TG544NL182_v1	-0.00391108	-0.0167373	0.00891509	0.548216
z_TG544NL203_v1	-0.00794935	-0.0195026	0.00360391	0.176309
z_TG544SIM_v1	-0.0072442	-0.0197102	0.00522182	0.253109
z_TG545NL183_v1	-0.00883471	-0.0213417	0.00367223	0.165126
z_TG545NL204_v1	-0.00965691	-0.0214726	0.00215882	0.108587
z_TG545SIM_v1	-0.0112214	-0.0232629	0.000820123	0.0675948
z_TG546NL183_v1	-0.00444033	-0.0155361	0.0066554	0.430856
z_TG546NL204_v1	-0.0116284	-0.0224807	-0.000776065	0.0358571
z_TG546NL205_v1	0.00585329	-0.00784625	0.0195528	0.400387
z_TG546NL226_v1	0.000196145	-0.0123899	0.0127821	0.975507
z_TG546SIM_v1	-0.00646321	-0.0180392	0.00511275	0.272132
z_TG547NL205_v1	0.00237019	-0.0101774	0.0149178	0.709846
z_TG547NL226_v1	-0.000958963	-0.0135708	0.0116529	0.880929
z_TG547SIM_v1	-9.81948e-07	-0.0113078	0.0113058	0.999863
z_TG566NL204_v1	-0.0140619	-0.0269038	-0.00121996	0.0320337
z_TG566NL225a_v1	-0.0105152	-0.0221184	0.00108807	0.0754383
z_TG566NL225b_v1	-0.0105152	-0.0221184	0.00108807	0.0754383
z_TG566SIM_v1	-0.0101429	-0.0224178	0.00213198	0.104768
z_TG567NL204_v1	-0.00469545	-0.0171988	0.00780791	0.459736
z_TG567NL205_v1	0.00229013	-0.0136556	0.0182359	0.777248
z_TG567NL225a_v1	-0.0104961	-0.0220651	0.00107277	0.0751052
z_TG567NL225b_v1	-0.0105623	-0.0220943	0.000969622	0.0723926
z_TG567NL226_v1	-0.00406697	-0.016282	0.0081481	0.512118
z_TG567SIM_v1	-0.00403269	-0.0160335	0.00796812	0.508217
z_TG568NL204_v1	-0.00297448	-0.014159	0.00821002	0.600463
z_TG568NL205_v1	0.00719513	-0.00625933	0.0206496	0.292809
z_TG568NL226_v1	-0.00197343	-0.0135124	0.00956557	0.736214
z_TG568SIM_v1	-0.00026728	-0.0114594	0.0109248	0.962476
z_TG569NL226_v1	0.00187015	-0.0107599	0.0145002	0.770537
z_TG569SIM_v1	0.00324303	-0.00853757	0.0150236	0.587741
z_TG5810NL226_v1	0.00323438	-0.00822469	0.0146935	0.578331
z_TG5810SIM_v1	0.00250672	-0.00865189	0.0136653	0.658168
z_TG588NL226_v1	-0.00453595	-0.0173011	0.00822923	0.484194
z_TG588SIM_v1	-0.000667494	-0.0129019	0.0115669	0.914407
z_TG589NL226_v1	0.000993783	-0.0108976	0.0128852	0.869233
z_TG589SIM_v1	-2.95247e-05	-0.0112305	0.0111714	0.995857
z_TGO501NL150_v1	0.00728067	-0.00437935	0.0189407	0.219578
z_TGO501NL160_v1	0.00882864	-0.00340716	0.0210644	0.15629
z_TGO501NL171_v1	0.00394749	-0.00886269	0.0167577	0.544
z_TGO501NL181_v1	0.00430572	-0.00674754	0.015359	0.443192
z_TGO501SIM_v1	0.0028578	-0.00867071	0.0143863	0.625409
z_TGO502NL161_v1	-0.00110257	-0.0125883	0.0103832	0.850011
z_TGO502NL181_v1	0.00984717	-0.00183465	0.021529	0.0980082
z_TGO502NL182_v1	0.0171838	0.00421317	0.0301545	0.00968951
z_TGO502SIM_v1	0.00343703	-0.00918975	0.0160638	0.591929
z_TGO503NL182_v1	0.00758772	-0.00564559	0.020821	0.259459
z_TGO503SIM_v1	0.00614544	-0.00617599	0.0184669	0.326436
z_TGO520NL160_v1	0.00031463	-0.0154001	0.0160294	0.968537
z_TGO520SIM_v1	0.0138086	0.000641366	0.0269759	0.0399379
z_TGO521NL160_v1	0.00393366	-0.00939565	0.017263	0.561157
z_TGO521NL181_v1	0.0036188	-0.00823822	0.0154758	0.547858
z_TGO521SIM_v1	0.000490516	-0.0127736	0.0137546	0.941923
z_TGO522NL160_v1	-0.000548145	-0.0131853	0.012089	0.931903
z_TGO522NL171_v1	0.007951	-0.00529306	0.0211951	0.237798
z_TGO522NL181_v1	0.00343279	-0.00834186	0.0152074	0.565903
z_TGO522SIM_v1	0.0027419	-0.00964678	0.0151306	0.662906
z_TGO542NL171_v1	0.00739714	-0.00319987	0.0179942	0.17015
z_TGO542NL181_v1	0.00148412	-0.0110178	0.013986	0.815101
z_TGO542SIM_v1	0.00228739	-0.0108325	0.0154072	0.731286
z_TGO543NL171_v1	0.0050233	-0.0061458	0.0161924	0.376102
z_TGO543NL181_v1	0.00426412	-0.00743005	0.0159583	0.472846
z_TGO543SIM_v1	0.0109853	-0.00581707	0.0277877	0.198733
z_TGO544NL171_v1	0.00369338	-0.00804074	0.0154275	0.535413
z_TGO544NL182_v1	0.0119613	-0.000955819	0.0248785	0.0693318
z_TGO544SIM_v1	0.00541487	-0.0086232	0.0194529	0.447664
z_Ubiquinone_v1	-0.00727804	-0.0231581	0.00860199	0.3671

## Sheet: lipids_v3
Lipid DV	B	95% LL	95% UL	p-value
z_AC120_v3	0.000514262	-0.013102	0.0141306	0.940658
z_AC130_v3	0.00178072	-0.00747756	0.011039	0.704667
z_AC140_v3	-0.00158861	-0.0148666	0.0116894	0.813586
z_AC141_v3	0.00442384	-0.0093518	0.0181995	0.526994
z_AC142_v3	0.00254687	-0.0126433	0.017737	0.741079
z_AC150a_v3	0.00739316	-0.00511407	0.0199004	0.24489
z_AC150b_v3	0.00516666	-0.00567232	0.0160056	0.348071
z_AC160_v3	0.000488323	-0.0121052	0.0130819	0.939078
z_AC161_v3	0.00665769	-0.00523925	0.0185546	0.270867
z_AC170a_v3	0.00113824	-0.011668	0.0139445	0.860937
z_AC170b_v3	0.00682704	-0.00568472	0.0193388	0.282963
z_AC180_v3	0.00168186	-0.0110697	0.0144334	0.794906
z_AC181_v3	0.0165367	0.00544669	0.0276266	0.00369746
z_AC182_v3	0.0153497	0.00360291	0.0270965	0.0107391
z_CE140_v3	-0.0032844	-0.0147383	0.00816946	0.572118
z_CE150_v3	0.0109119	-8.5595e-06	0.0218324	0.0501778
z_CE160_v3	0.0124799	-0.00164076	0.0266006	0.0828561
z_CE161_v3	-0.002664	-0.0130037	0.00767574	0.611704
z_CE162_v3	-6.27053e-05	-0.0117981	0.0116727	0.991597
z_CE170_v3	0.0025115	-0.00927414	0.0142971	0.674545
z_CE171_v3	0.00580382	-0.00488107	0.0164887	0.28514
z_CE180_v3	-0.00111929	-0.0134778	0.0112392	0.858325
z_CE181_v3	0.00403543	-0.00873418	0.016805	0.533591
z_CE182_v3	0.0211127	0.00823652	0.0339889	0.00145266
z_CE183_v3	0.00657556	-0.00497383	0.0181249	0.262654
z_CE200_v3	0.00328264	-0.00826583	0.0148311	0.575448
z_CE201_v3	0.00791643	-0.0037243	0.0195572	0.181246
z_CE202_v3	0.00497108	-0.0055442	0.0154864	0.352033
z_CE203_v3	0.0132837	0.000617753	0.0259497	0.039936
z_CE204_v3	0.0112638	-0.000948323	0.0234759	0.0704083
z_CE205_v3	0.00338586	-0.00590172	0.0126734	0.472746
z_CE220_v3	0.0019943	-0.00941965	0.0134082	0.730598
z_CE221_v3	0.000579956	-0.0090239	0.0101838	0.905256
z_CE224_v3	0.00797886	-0.00332102	0.0192787	0.165188
z_CE225n3_v3	0.0124059	0.00194446	0.0228673	0.0203945
z_CE225n6_v3	0.00535827	-0.00550069	0.0162172	0.331421
z_CE226_v3	0.0110081	0.000622571	0.0213937	0.0378917
z_CE240_v3	0.0120824	-6.48115e-05	0.0242296	0.051221
z_CE241_v3	0.0106606	0.000483291	0.0208379	0.0401772
z_CE244_v3	0.00946104	-0.000613178	0.0195353	0.0654921
z_CE245_v3	0.0116937	0.00203354	0.0213539	0.0179612
z_CE246_v3	0.00231024	-0.00988144	0.0145019	0.708832
z_Cerd161160_v3	0.000634381	-0.0109	0.0121688	0.913675
z_Cerd161180_v3	0.00634406	-0.00470195	0.0173901	0.258511
z_Cerd161200_v3	0.00214567	-0.00852758	0.0128189	0.691991
z_Cerd161220_v3	0.0101124	-0.000740823	0.0209656	0.0676205
z_Cerd161230_v3	0.00790946	-0.00104204	0.016861	0.0829298
z_Cerd161240_v3	0.00743498	-0.00321026	0.0180802	0.169801
z_Cerd161241_v3	0.00461652	-0.00305658	0.0122896	0.236612
z_Cerd171160_v3	0.0184077	0.00541085	0.0314045	0.00577094
z_Cerd171180_v3	-0.00180812	-0.0147691	0.0111529	0.783363
z_Cerd171200_v3	0.00581164	-0.00534601	0.0169693	0.305329
z_Cerd171220_v3	0.00946248	-0.0022173	0.0211423	0.111622
z_Cerd171230_v3	0.00615154	-0.00378736	0.0160904	0.223488
z_Cerd171240_v3	0.00940046	-0.00133781	0.0201387	0.0857909
z_Cerd171241_v3	0.0149016	0.00542415	0.024379	0.00223723
z_Cerd181140_v3	0.00124068	-0.0089758	0.0114572	0.81084
z_Cerd181160_v3	0.00792809	-0.00427718	0.0201334	0.20151
z_Cerd181170_v3	-0.00223544	-0.0154217	0.0109508	0.738308
z_Cerd181180_v3	0.0046671	-0.00645546	0.0157897	0.408669
z_Cerd181190_v3	0.00350846	-0.00907029	0.0160872	0.582648
z_Cerd181200_v3	0.00667172	-0.00439438	0.0177378	0.235665
z_Cerd181210_v3	0.00349498	-0.00743128	0.0144212	0.528621
z_Cerd181220_v3	0.00727102	-0.0031483	0.0176903	0.170161
z_Cerd181230_v3	0.00385068	-0.00690308	0.0146045	0.480639
z_Cerd181240_v3	0.00749763	-0.00229483	0.0172901	0.132545
z_Cerd181241_v3	0.0124225	0.00190193	0.0229431	0.0209316
z_Cerd181260_v3	0.00673894	-0.00510029	0.0185782	0.26277
z_Cerd182140_v3	0.00746085	-0.00493479	0.0198565	0.236443
z_Cerd182160_v3	0.0108441	-0.00268466	0.0243729	0.115446
z_Cerd182170_v3	-0.00683804	-0.0200717	0.00639565	0.309188
z_Cerd182180_v3	0.00122127	-0.00965668	0.0120992	0.824879
z_Cerd182210_v3	0.00316742	-0.00908135	0.0154162	0.610401
z_Cerd182220_v3	0.00725203	-0.00383741	0.0183415	0.198491
z_Cerd182230_v3	0.0015472	-0.0085078	0.0116022	0.761691
z_Cerd182240_v3	0.0114679	0.000726324	0.0222095	0.0365406
z_Cerd182241_v3	0.00585457	-0.00437011	0.0160793	0.25995
z_Cerd182260_v3	0.0030479	-0.00909919	0.015195	0.621031
z_Cerd191160_v3	-0.000368806	-0.0127734	0.0120358	0.953269
z_Cerd191180_v3	-0.000317256	-0.0120774	0.0114429	0.957594
z_Cerd191200_v3	0.00287029	-0.00739887	0.0131395	0.581856
z_Cerd191220_v3	0.00895268	-0.00301551	0.0209209	0.141621
z_Cerd191230_v3	0.00376528	-0.0048019	0.0123325	0.386846
z_Cerd191240_v3	0.00985872	-0.00137857	0.021096	0.085117
z_Cerd191241_v3	0.0104353	0.00153645	0.0193341	0.0218152
z_Cerd191260_v3	0.00815455	-0.00484736	0.0211565	0.217408
z_Cerd201220_v3	-0.00104685	-0.0150814	0.0129877	0.883118
z_Cerd201230_v3	0.00269711	-0.00887387	0.0142681	0.646022
z_Cerd201240_v3	0.00182863	-0.0100713	0.0137285	0.762007
z_Cerd201241_v3	0.0068058	-0.00455399	0.0181656	0.238606
z_Cerd201260_v3	0.0113877	-0.00210866	0.0248841	0.0976383
z_Cerm180200_v3	0.0056171	-0.00323738	0.0144716	0.212198
z_Cerm180220_v3	0.00396407	-0.00540588	0.013334	0.404829
z_Cerm180230_v3	0.00259711	-0.00815442	0.0133486	0.6341
z_Cerm180240_v3	0.00283169	-0.00688107	0.0125444	0.565718
z_Cerm180241_v3	0.00658839	-0.00466946	0.0178462	0.249621
z_Cerm181180_v3	-0.00233915	-0.0144987	0.00982039	0.704618
z_Cerm181200_v3	0.00524352	-0.00466292	0.01515	0.297585
z_Cerm181220_v3	0.00423341	-0.00566921	0.014136	0.399924
z_Cerm181230_v3	0.00557742	-0.00459765	0.0157525	0.280774
z_Cerm181240_v3	0.00416037	-0.00613762	0.0144584	0.426286
z_Cerm181241_v3	0.00502743	-0.00701017	0.017065	0.41086
z_Cer1Pd181160_v3	0.00723738	-0.00563209	0.0201069	0.268524
z_COH_v3	0.00735848	-0.00449029	0.0192073	0.22193
z_DE160_v3	0.018654	0.00487074	0.0324372	0.00828142
z_DE181_v3	0.0132806	-8.79525e-05	0.0266492	0.0515093
z_DE182_v3	0.0142763	0.000310953	0.0282417	0.0451665
z_DE204_v3	0.00957795	-0.00421996	0.0233759	0.172413
z_DE205_v3	0.0132943	5.94964e-05	0.026529	0.0489903
z_DE226_v3	0.00980511	-0.00319835	0.0228086	0.138482
z_DG140_160_v3	-0.00936497	-0.0197889	0.00105892	0.0779408
z_DG160_160_v3	-0.00326005	-0.0135032	0.00698313	0.530688
z_DG160_161_v3	-0.000657974	-0.0103574	0.0090415	0.893636
z_DG140_182_v3	-0.00227505	-0.0125216	0.00797146	0.66174
z_DG160_181_v3	-0.00266712	-0.0142379	0.00890361	0.649684
z_DG161_181_v3	0.00516485	-0.00510053	0.0154302	0.32204
z_DG160_182_v3	0.00129687	-0.0105214	0.0131151	0.828771
z_DG180_181_v3	-0.00721361	-0.0193339	0.00490671	0.2417
z_DG181_181_v3	0.00496746	-0.00736646	0.0173014	0.427717
z_DG180_182_v3	-0.00491599	-0.0167097	0.00687771	0.411769
z_DG181_182_v3	0.00933553	-0.0037973	0.0224684	0.162377
z_DG182_182_v3	0.00396739	-0.00774213	0.0156769	0.504523
z_DG181_183_v3	-0.00120494	-0.0154777	0.0130678	0.867842
z_DG160_204_v3	0.00369642	-0.00779645	0.0151893	0.526361
z_DG181_203_v3	0.00973718	-0.00032278	0.0197971	0.0577294
z_DG180_204_v3	0.00674716	-0.00535493	0.0188492	0.272657
z_DG181_204_v3	0.00956683	-0.00240297	0.0215366	0.116492
z_DG160_225_v3	0.00080372	-0.008629	0.0102364	0.866633
z_DG182_204_v3	0.00525914	-0.00690768	0.017426	0.394721
z_DG160_226_v3	0.000855621	-0.00919407	0.0109053	0.866736
z_DG181_205_v3	0.00309865	-0.00746554	0.0136628	0.563348
z_DG182_226_v3	0.00565876	-0.00255929	0.0138768	0.175871
z_dhCerd180160_v3	-0.00264525	-0.0160197	0.0107292	0.696717
z_dhCerd180180_v3	0.00385193	-0.0076166	0.0153205	0.508233
z_dhCerd180200_v3	0.00861714	-0.0042512	0.0214855	0.187993
z_dhCerd180220_v3	0.00496751	-0.00686953	0.0168045	0.408612
z_dhCerd180240_v3	0.00494701	-0.00797923	0.0178732	0.451021
z_dhCerd180241_v3	0.00335082	-0.00753745	0.0142391	0.544345
z_GM1d181160_v3	0.0198757	0.00706589	0.0326855	0.00254816
z_GM3d181160_v3	0.0136349	0.00192163	0.0253481	0.0227862
z_GM3d181180_v3	0.0138222	0.00273	0.0249144	0.0148978
z_GM3d181200_v3	0.00615582	-0.00524483	0.0175565	0.288002
z_GM3d181220_v3	0.0077143	-0.00232723	0.0177558	0.131251
z_GM3d181240_v3	0.00199388	-0.00781207	0.0117998	0.688651
z_GM3d181241_v3	0.013139	0.00264355	0.0236345	0.0144489
z_HexCerd161180_v3	0.00181806	-0.00946999	0.0131061	0.750931
z_HexCerd161200_v3	6.86348e-05	-0.0104819	0.0106191	0.98977
z_HexCerd161220_v3	-0.000339017	-0.0110974	0.0104193	0.950474
z_HexCerd161240_v3	0.00248361	-0.00686699	0.0118342	0.600752
z_HexCerd181160_v3	0.00472654	-0.00622805	0.0156811	0.395579
z_HexCerd181180_v3	-0.000834846	-0.0118287	0.010159	0.881023
z_HexCerd181200_v3	-0.00075919	-0.00945322	0.00793484	0.863341
z_HexCerd181220_v3	0.00555861	-0.0045019	0.0156191	0.276968
z_HexCerd181240_v3	-8.56151e-05	-0.0101484	0.00997713	0.98662
z_HexCerd181241_v3	0.00754455	-0.00133969	0.0164288	0.0955113
z_HexCerd182180_v3	0.000222197	-0.0120684	0.0125128	0.971574
z_HexCerd182200_v3	-0.0108257	-0.0233886	0.00173722	0.0907655
z_HexCerd182220_v3	0.00303543	-0.00810283	0.0141737	0.591317
z_HexCerd182240_v3	0.00449374	-0.00694687	0.0159344	0.43921
z_Hex2Cerd161160_v3	0.0107408	0.0013825	0.020099	0.0247337
z_Hex2Cerd161241_v3	0.0126029	0.00181992	0.0233859	0.0222486
z_Hex2Cerd181160_v3	0.015949	0.00498955	0.0269086	0.00458687
z_Hex2Cerd181180_v3	0.00697871	-0.00663187	0.0205893	0.312912
z_Hex2Cerd181200_v3	-0.000894873	-0.0138637	0.012074	0.89182
z_Hex2Cerd181220_v3	0.00569367	-0.00550144	0.0168888	0.316838
z_Hex2Cerd181240_v3	0.0112174	4.40781e-05	0.0223907	0.049113
z_Hex2Cerd181241_v3	0.0125517	0.00179492	0.0233084	0.0224651
z_Hex2Cerd182160_v3	0.00951074	-6.02246e-05	0.0190817	0.0514428
z_Hex2Cerd182241_v3	0.00270581	-0.00713253	0.0125441	0.587916
z_Hex3Cerd181160_v3	0.0114509	-0.000974483	0.0238763	0.0706417
z_Hex3Cerd181180_v3	0.0141733	0.00096137	0.0273853	0.0356575
z_Hex3Cerd181200_v3	0.00442459	-0.00846844	0.0173176	0.499062
z_Hex3Cerd181220_v3	0.0101663	-0.00198639	0.022319	0.100515
z_Hex3Cerd181240_v3	0.0115449	-0.000517859	0.0236077	0.0605587
z_Hex3Cerd181241_v3	0.0145272	0.00160599	0.0274484	0.0277835
z_LPC140sn2_v3	-0.0130899	-0.0239702	-0.00220958	0.0186662
z_LPC140sn1_v3	-0.014044	-0.0250222	-0.00306586	0.0124731
z_LPC150sn2_v3	-0.00339245	-0.0146401	0.00785516	0.552384
z_LPC150sn1_v3	0.000516479	-0.0104525	0.0114855	0.926057
z_LPC160sn2_v3	0.00705482	-0.00545641	0.0195661	0.267245
z_LPC160sn1_v3	0.00933676	-0.00308506	0.0217586	0.139732
z_LPC161sn2_v3	-0.0045169	-0.0143614	0.00532759	0.366374
z_LPC161sn1_v3	-0.00305031	-0.0140138	0.00791315	0.583586
z_LPC15MHDAsn2_v3	0.00236258	-0.00826781	0.012993	0.661431
z_LPC15MHDAsn1LPC170_v3	0.00528034	-0.00646195	0.0170226	0.375976
z_LPC15MHDAsn1104_sn1_v3	0.00268475	-0.00860669	0.0139762	0.639425
z_LPC170sn1_v3	0.0113199	-0.00116539	0.0238053	0.0752741
z_LPC171sn2a_v3	-0.00298938	-0.0147774	0.00879868	0.617312
z_LPC171sn1aLPC171_v3	-0.00267325	-0.0142901	0.00894362	0.650234
z_LPC171asn1104_sn1_v3	-0.00402106	-0.0149982	0.00695611	0.470622
z_LPC171sn1b_v3	-0.00929869	-0.0194707	0.000873369	0.0729185
z_LPC180sn2_v3	0.00378997	-0.00830639	0.0158863	0.537093
z_LPC180sn1_v3	0.00383939	-0.00850549	0.0161843	0.540087
z_LPC181sn2_v3	-0.00356106	-0.0158221	0.0087	0.567193
z_LPC181sn1_v3	0.00195717	-0.00975848	0.0136728	0.741986
z_LPC182sn2_v3	0.00291824	-0.0107063	0.0165428	0.672974
z_LPC182sn1_v3	0.00295715	-0.0102095	0.0161238	0.658084
z_LPC183sn2a_v3	-0.0102268	-0.0243833	0.00392965	0.155692
z_LPC183sn1aLPC183s_v3	-0.0090175	-0.0232675	0.00523252	0.213329
z_LPC183asn1104_sn1_v3	-0.00673567	-0.0201449	0.00667356	0.322824
z_LPC183sn1b_v3	-0.0105513	-0.024331	0.0032285	0.132518
z_LPC190sn2a_v3	-0.0013426	-0.0131803	0.0104952	0.823115
z_LPC190sn1aLPC190_v3	0.00625754	-0.00712643	0.0196415	0.357364
z_LPC190asn1104_sn1_v3	-0.00188913	-0.0128541	0.00907583	0.734193
z_LPC190sn1b_v3	0.0072961	-0.00625372	0.0208459	0.289329
z_LPC191a_v3	-0.00586274	-0.0176525	0.00592698	0.327677
z_LPC191b_v3	-0.00319664	-0.0149771	0.00858381	0.592899
z_LPC191c_v3	-0.0014678	-0.0114786	0.00854304	0.772581
z_LPC200sn2_v3	0.00811737	-0.00302265	0.0192574	0.152158
z_LPC200sn1_v3	0.00732263	-0.00423436	0.0188796	0.212742
z_LPC201sn2_v3	0.00812162	-0.00208007	0.0183233	0.11792
z_LPC201sn1_v3	0.0120286	-0.000158479	0.0242157	0.0530202
z_LPC202sn2_v3	0.00231327	-0.010665	0.0152915	0.725393
z_LPC202sn1_v3	0.00194084	-0.0109123	0.014794	0.766015
z_LPC203sn2_v3	-0.00130898	-0.0142674	0.0116494	0.842191
z_LPC203sn1_v3	-0.00216754	-0.0151288	0.0107937	0.741725
z_LPC204sn2_v3	0.00200638	-0.0116857	0.0156985	0.772739
z_LPC204sn1_v3	0.00282813	-0.0106714	0.0163276	0.679732
z_LPC205sn2_v3	-0.00230204	-0.0132647	0.00866062	0.679024
z_LPC205sn1_v3	-0.00267372	-0.0136947	0.00834726	0.632635
z_LPC220sn2_v3	0.00915322	-0.00390957	0.022216	0.168414
z_LPC220sn1_v3	0.00657119	-0.00698389	0.0201263	0.339947
z_LPC221sn2_v3	0.00260834	-0.00748056	0.0126972	0.610466
z_LPC221sn1_v3	0.00415426	-0.00545302	0.0137615	0.394539
z_LPC224sn2_v3	-0.00416305	-0.0147385	0.00641238	0.438206
z_LPC224sn1_v3	-0.00672227	-0.0179762	0.00453165	0.240002
z_LPC225sn2n3_v3	-0.00448155	-0.0168607	0.00789763	0.475825
z_LPC225sn1n3LPC225_v3	-0.00476384	-0.0169548	0.00742712	0.441564
z_LPC225n3sn1104_sn1_v3	-0.00236611	-0.0147674	0.0100351	0.706924
z_LPC225sn1n6_v3	-0.00163221	-0.0120544	0.00879002	0.757596
z_LPC226sn2_v3	0.00395403	-0.00864143	0.0165495	0.536302
z_LPC226sn1_v3	0.00515122	-0.00685413	0.0171566	0.398196
z_LPC240sn2_v3	0.00281371	-0.00961188	0.0152393	0.65545
z_LPC240sn1_v3	0.000702968	-0.0113911	0.0127971	0.90879
z_LPC260sn2_v3	0.00883859	-0.00361314	0.0212903	0.16298
z_LPC260sn1_v3	0.0026036	-0.00846671	0.0136739	0.643052
z_LPCO160_v3	0.00881343	-0.00255675	0.0201836	0.127848
z_LPCO180_v3	0.00518534	-0.00477699	0.0151477	0.305673
z_LPCO181_v3	0.011758	0.000353059	0.023163	0.0433908
z_LPCO200_v3	0.00882797	-0.00101101	0.0186669	0.0783254
z_LPCO201_v3	0.00920993	-0.00114569	0.0195655	0.0809562
z_LPCO220_v3	0.00984825	-0.00173201	0.0214285	0.0950368
z_LPCO221_v3	0.0138572	0.00118855	0.0265257	0.0322339
z_LPCO240_v3	0.00453002	-0.00706847	0.0161285	0.441795
z_LPCO241_v3	0.0108095	-0.00249692	0.024116	0.110663
z_LPCO242_v3	0.0128641	0.000585711	0.0251424	0.0401366
z_LPCP160_v3	0.00579233	-0.0073523	0.018937	0.385609
z_LPCP170a_v3	-0.00106286	-0.0112838	0.00915808	0.837597
z_LPCP170b_v3	0.00250942	-0.00918184	0.0142007	0.672308
z_LPCP180_v3	0.00340732	-0.00975375	0.0165684	0.609983
z_LPCP181_v3	0.00574031	-0.00701529	0.0184959	0.375593
z_LPCP200_v3	0.0115808	-0.00281113	0.0259727	0.11405
z_LPE160sn2_v3	-0.00207231	-0.0150278	0.0108832	0.752584
z_LPE160sn1_v3	0.000949141	-0.0121241	0.0140223	0.886213
z_LPE170sn2_v3	-0.0038995	-0.0173169	0.00951792	0.566936
z_LPE170sn1_v3	0.00139071	-0.0113961	0.0141775	0.830267
z_LPE180sn2_v3	-0.00283151	-0.0157509	0.0100879	0.665835
z_LPE180sn1_v3	-0.00120068	-0.0145105	0.0121091	0.858879
z_LPE181sn2_v3	-0.000692914	-0.0143052	0.0129194	0.920081
z_LPE181sn1_v3	0.000271938	-0.0128851	0.013429	0.967504
z_LPE182sn2_v3	-0.00381769	-0.0171317	0.00949628	0.572127
z_LPE182sn1_v3	-0.00302781	-0.0158315	0.00977592	0.641242
z_LPE204sn2_v3	0.00111265	-0.0113217	0.013547	0.860006
z_LPE204sn1_v3	-0.00319237	-0.0157123	0.00932752	0.615364
z_LPE226sn2_v3	0.00733379	-0.00492363	0.0195912	0.23923
z_LPE226sn1_v3	0.0115583	-0.000827952	0.0239446	0.0672089
z_LPEP160_v3	0.00266454	-0.00923808	0.0145672	0.659128
z_LPEP180_v3	0.00545405	-0.00483881	0.0157469	0.297055
z_LPEP181_v3	0.00245259	-0.00892755	0.0138327	0.671071
z_LPEP200_v3	0.0160522	0.00446395	0.0276405	0.00690938
z_LPI180sn2_v3	0.0015245	-0.0124387	0.0154877	0.829624
z_LPI180sn1_v3	-0.00439873	-0.0183822	0.0095847	0.535469
z_LPI181sn2_v3	0.000543179	-0.0138977	0.014984	0.9409
z_LPI181sn1_v3	-0.0063072	-0.0226701	0.0100557	0.447785
z_LPI182sn2_v3	-0.00179837	-0.014134	0.0105372	0.773868
z_LPI182sn1_v3	-0.00446734	-0.0169226	0.00798797	0.479916
z_LPI204sn2_v3	-0.0041586	-0.0175247	0.00920747	0.539931
z_LPI204sn1_v3	-0.00606864	-0.0206411	0.00850378	0.412199
z_PC280_v3	-0.0143747	-0.0249402	-0.00380914	0.00795374
z_PC140_160_v3	-0.0112896	-0.0218474	-0.000731777	0.036248
z_PC310a_v3	-0.0130548	-0.024137	-0.0019726	0.0212309
z_PC310b_v3	-0.00374721	-0.0145373	0.00704288	0.493949
z_PC160_160_v3	0.00116715	-0.0110158	0.0133501	0.850234
z_PC321_v3	-0.00519154	-0.014591	0.00420796	0.277139
z_PC322_v3	-0.0024952	-0.013843	0.00885256	0.664807
z_PC330a_v3	-0.00833146	-0.019488	0.00282506	0.142295
z_PC330b_v3	0.000863381	-0.011942	0.0136688	0.89428
z_PC331_v3	-0.00615676	-0.0166179	0.00430442	0.246966
z_PC332_v3	0.00768244	-0.00368174	0.0190466	0.183839
z_PC160_180_v3	-0.000732072	-0.0137858	0.0123217	0.911984
z_PC160_181_v3	0.000700979	-0.012472	0.0138739	0.916467
z_PC160_182_v3	0.00775549	-0.00650163	0.0220126	0.28444
z_PC161_182_v3	0.0150056	0.00338201	0.0266293	0.011706
z_PC160_183a_v3	-0.00215318	-0.0144617	0.0101553	0.730286
z_PC160_183b_v3	-0.00755352	-0.0190358	0.00392875	0.195851
z_PC140_204_v3	-0.00268816	-0.0131463	0.00776996	0.612541
z_PC345_v3	-0.00350512	-0.0132224	0.00621221	0.477427
z_PC15MHDA_181_v3	-0.00419974	-0.0152071	0.00680768	0.452408
z_PC170_181_v3	-0.00216489	-0.0150556	0.0107258	0.740669
z_PC15MHDA_182_v3	0.00832427	-0.00386823	0.0205168	0.179545
z_PC170_182_v3	0.0123771	-0.000413274	0.0251675	0.0577871
z_PC171_182_v3	0.00809799	-0.00419884	0.0203948	0.195378
z_PC150_203_v3	0.00247195	-0.00953693	0.0144808	0.685015
z_PC150_204_v3	0.00355044	-0.00654964	0.0136505	0.488693
z_PC355_v3	-0.00352597	-0.0135346	0.0064827	0.487748
z_PC360_v3	0.00596152	-0.00403617	0.0159592	0.240816
z_PC180_181_v3	-0.00953714	-0.0213902	0.00231595	0.114077
z_PC181_181_v3	-0.000222791	-0.0121954	0.0117498	0.970742
z_PC180_182_v3	0.00218419	-0.0119784	0.0163468	0.761174
z_PC181_182_v3	0.0124201	-0.00136048	0.0262007	0.0770066
z_PC160_203a_v3	0.000588346	-0.0121802	0.0133569	0.927635
z_PC160_203b_v3	-0.00638623	-0.0167965	0.00402406	0.227598
z_PC182_182_v3	0.0061329	-0.00914055	0.0214064	0.429101
z_PC160_204_v3	0.0105921	-0.00217347	0.0233577	0.103291
z_PC161_204_v3	0.00825002	-0.00259501	0.0190951	0.135042
z_PC160_205_v3	-0.000303658	-0.00992098	0.00931367	0.950377
z_PC366a_v3	-0.000387835	-0.00995195	0.00917628	0.936295
z_PC140_226_v3	-0.000934916	-0.0107412	0.0088714	0.85095
z_PC15MHDA_204_v3	0.00930566	-0.00173228	0.0203436	0.0979145
z_PC170_204_v3	0.00697326	-0.00522859	0.0191751	0.260863
z_PC150_226_v3	0.0061331	-0.00363265	0.0158988	0.216795
z_PC382_v3	0.00233313	-0.0100621	0.0147283	0.710688
z_PC180_203_v3	-0.00304807	-0.0141637	0.00806761	0.58902
z_PC181_203_v3	0.00357715	-0.00829216	0.0154465	0.552697
z_PC384b_v3	-0.00615039	-0.0169022	0.00460138	0.260412
z_PC180_204_v3	0.00851885	-0.00284626	0.019884	0.140824
z_PC385a_v3	0.00788239	-0.00508141	0.0208462	0.231717
z_PC385b_v3	-0.000210094	-0.0116154	0.0111952	0.971037
z_PC386a_v3	0.00714375	-0.00611757	0.0204051	0.289127
z_PC160_226_v3	0.0110025	-0.00228452	0.0242896	0.103984
z_PC182_205_v3	-0.000926016	-0.011823	0.00997094	0.866983
z_PC161_226_v3	0.011088	0.000509737	0.0216662	0.0400457
z_PC387c_v3	0.00694647	-0.00396025	0.0178532	0.210397
z_PC395a_v3	-0.00323666	-0.0140841	0.00761074	0.556649
z_PC395b_v3	0.00212829	-0.0113042	0.0155608	0.754847
z_PC15MHDA_226_v3	0.00806487	-0.00160139	0.0177311	0.101412
z_PC170_226_v3	0.00881961	-0.00234115	0.0199804	0.12064
z_PC4010_v3	0.00367321	-0.0116793	0.0190257	0.63733
z_PC180_224_v3	-0.00520021	-0.0140305	0.00363007	0.246668
z_PC200_204_v3	0.00896827	-0.00282879	0.0207653	0.135301
z_PC180_225n3PC201_204_v3	-0.004406	-0.0160195	0.0072075	0.454956
z_PC180_225n6_v3	0.0032411	-0.00717004	0.0136522	0.539697
z_PC180_226_v3	0.00798154	-0.00309768	0.0190608	0.156838
z_PC407a_v3	0.00222161	-0.0112288	0.015672	0.744797
z_PC181_226a_v3	0.0187048	0.00719968	0.0302099	0.00158975
z_PC181_226b_v3	0.00156331	-0.0088868	0.0120134	0.768126
z_PC408_v3	0.00220008	-0.0106988	0.0150989	0.73677
z_PC4412_v3	-0.00572617	-0.0159655	0.00451312	0.27118
z_PCO160160_v3	0.00943186	-0.0026097	0.0214734	0.123921
z_PCO321_v3	0.00515824	-0.00437289	0.0146894	0.286895
z_PCO322_v3	0.00102662	-0.00845523	0.0105085	0.831018
z_PCO341_v3	0.0119095	-0.00129804	0.0251171	0.0768623
z_PCO342_v3	0.00186709	-0.00800921	0.0117434	0.709486
z_PCO344_v3	-0.00354763	-0.0141682	0.00707295	0.510551
z_PCO354_v3	0.000885375	-0.0102996	0.0120704	0.876019
z_PCO360_v3	0.00749321	-0.00418494	0.0191714	0.207026
z_PCO180181_v3	0.00553333	-0.00473382	0.0158005	0.288909
z_PCO181181_v3	0.00946448	-0.00279429	0.0217233	0.129358
z_PCO180182_v3	0.00538758	-0.00521238	0.0159875	0.317143
z_PCO181182_v3	0.00654316	-0.00366177	0.0167481	0.207364
z_PCO160203_v3	0.00372401	-0.00723328	0.0146813	0.503207
z_PCO160204_v3	0.00936206	-0.00223459	0.0209587	0.112879
z_PCO365_v3	-0.00057176	-0.0094288	0.00828528	0.898753
z_PCO180204_v3	0.00851275	-0.000804766	0.0178303	0.0730791
z_PCO385_v3	0.0132363	0.000888119	0.0255845	0.0358007
z_PCO160226_v3	0.00197257	-0.00741106	0.0113562	0.6787
z_PCO405_v3	0.0153136	0.00269598	0.0279313	0.0176685
z_PCO180226_v3	0.00472204	-0.00454908	0.0139932	0.316135
z_PCO407a_v3	0.00984637	-0.000953979	0.0206467	0.0736901
z_PCO407b_v3	0.0107504	-0.000350367	0.0218513	0.0575957
z_PCP160140_v3	-0.00211209	-0.0131313	0.00890709	0.705639
z_PCP160160_v3	0.00824505	-0.00360937	0.0200995	0.171575
z_PCP160161_v3	0.00665277	-0.00537772	0.0186833	0.276557
z_PCP160181_v3	0.00225305	-0.0100612	0.0145673	0.718428
z_PCP160182_v3	0.011184	-0.000314572	0.0226826	0.056531
z_PCP160183_v3	0.0040543	-0.00923314	0.0173417	0.547778
z_PCP352a_v3	0.00622652	-0.00567425	0.0181273	0.303171
z_PCP352b_v3	0.00108456	-0.0116547	0.0138238	0.866737
z_PCP150204a_v3	-0.00547008	-0.0166726	0.0057324	0.336454
z_PCP150204b_v3	0.00247863	-0.00813286	0.0130901	0.645323
z_PCP181181_v3	0.00422289	-0.00669394	0.0151397	0.446179
z_PCP180182_v3	0.0043573	-0.00681406	0.0155287	0.442411
z_PCP363_v3	0.00626568	-0.00611044	0.0186418	0.319039
z_PCP160204_v3	0.00933193	-0.00261014	0.021274	0.124801
z_PCP160205_v3	0.000969004	-0.00724975	0.00918776	0.816249
z_PCP170204a_v3	0.00958385	-0.00177052	0.0209382	0.0975176
z_PCP170204b_v3	0.00611863	-0.00605994	0.0182972	0.322734
z_PCP180204_v3	0.00546723	-0.00559269	0.0165271	0.330556
z_PCP385a_v3	0.00888513	-0.00261304	0.0203833	0.129021
z_PCP385b_v3	0.00363319	-0.00732156	0.0145879	0.513564
z_PCP160226_v3	0.00577765	-0.00425012	0.0158054	0.256999
z_PCP200204_v3	0.00894347	-0.00292276	0.0208097	0.138657
z_PCP180225_v3	0.0117044	-0.000104056	0.0235129	0.0520302
z_PCP180226_v3	0.00565922	-0.00360717	0.0149256	0.229663
z_PCP181226_v3	0.00434977	-0.00640544	0.015105	0.425776
z_PE160_160_v3	-0.00729079	-0.0211513	0.0065697	0.30059
z_PE160_161_v3	-0.0059866	-0.0152601	0.0032869	0.204289
z_PE160_181_v3	-0.00750165	-0.0191438	0.00414052	0.205133
z_PE160_182_v3	-0.00493071	-0.0153705	0.00550911	0.352503
z_PE161_182_v3	-0.0020936	-0.0117702	0.00758304	0.669854
z_PE160_183a_v3	-0.00694309	-0.0182083	0.00432206	0.225423
z_PE160_183b_v3	-0.0114053	-0.0219345	-0.000876157	0.0339224
z_PE15MHDA_181_v3	-0.00361253	-0.0152213	0.00799622	0.539854
z_PE170_181_v3	-0.00816727	-0.0206042	0.0042696	0.196626
z_PE15MHDA_182_v3	-0.00333459	-0.0144237	0.00775454	0.553579
z_PE170_182_v3	-0.002521	-0.0140926	0.00905056	0.667705
z_PE360_v3	-0.00209361	-0.0168449	0.0126577	0.779698
z_PE180_181_v3	-0.0109857	-0.0249854	0.003014	0.123239
z_PE181_181_v3	-3.22347e-05	-0.0133946	0.0133301	0.996206
z_PE180_182_v3	-0.00802454	-0.0203101	0.00426105	0.199032
z_PE181_182_v3	-0.00229946	-0.0153169	0.010718	0.727755
z_PE160_203_v3	-0.00857075	-0.0198221	0.00268056	0.134515
z_PE160_204_v3	-0.00214356	-0.0143044	0.0100173	0.728314
z_PE161_204_v3	-0.00147021	-0.0111304	0.00818996	0.764208
z_PE160_205_v3	-0.0078732	-0.0184918	0.00274536	0.145143
z_PE15MHDA_204_v3	-0.00574492	-0.0163551	0.00486525	0.286646
z_PE170_204_v3	0.00200874	-0.00993525	0.0139527	0.740306
z_PE180_203a_v3	-0.00600323	-0.01636	0.00435356	0.25414
z_PE180_203b_v3	-0.00981998	-0.0194941	-0.000145817	0.046683
z_PE180_204_v3	0.000635803	-0.0116071	0.0128787	0.918471
z_PE385a_v3	0.00233876	-0.00994744	0.014625	0.707567
z_PE385b_v3	-0.00720372	-0.0181311	0.00372363	0.194909
z_PE160_226_v3	-0.000494963	-0.0136775	0.0126875	0.941005
z_PE15MHDA_226_v3	-0.000912885	-0.0122315	0.0104058	0.873688
z_PE170_226_v3	0.00487453	-0.00588158	0.0156307	0.372253
z_PE180_224_v3	-0.00470703	-0.0131549	0.00374086	0.272946
z_PE200_204_v3	2.11224e-06	-0.0136091	0.0136133	0.999756
z_PE180_225n3_v3	-0.0061651	-0.0175253	0.00519512	0.285561
z_PE180_225n6_v3	-0.0065831	-0.0151839	0.00201774	0.132666
z_PE180_226_v3	-0.00140651	-0.0146126	0.0117996	0.833736
z_PE181_226a_v3	0.00532117	-0.00610449	0.0167468	0.35922
z_PE181_226b_v3	0.00204431	-0.00864125	0.0127299	0.706155
z_PEO341_v3	0.00606292	-0.00686488	0.0189907	0.355885
z_PEO160182_v3	0.00168776	-0.00866834	0.0120439	0.748075
z_PEO181182_v3	0.00589053	-0.0054834	0.0172645	0.308073
z_PEO160203_v3	-0.0078717	-0.0192071	0.00346368	0.172228
z_PEO160204_v3	0.00335869	-0.00622318	0.0129405	0.48993
z_PEO365_v3	-0.0022296	-0.0108775	0.00641832	0.611455
z_PEO160224_v3	-0.00524205	-0.0175181	0.007034	0.400437
z_PEO180204_v3	0.000356945	-0.00991781	0.0106317	0.945408
z_PEO385a_v3	0.0021783	-0.00891628	0.0132729	0.698823
z_PEO385b_v3	-0.00889058	-0.0190918	0.00131068	0.0871785
z_PEO160226_v3	0.00586559	-0.00473966	0.0164708	0.276468
z_PEO180225_v3	-0.00833511	-0.0193207	0.00265049	0.136048
z_PEO180226_v3	-0.00341767	-0.0142463	0.00741093	0.5341
z_PEO181226_v3	0.00260572	-0.00783619	0.0130476	0.622928
z_PEP150204a_v3	-0.00318842	-0.0144083	0.00803142	0.575568
z_PEP150204b_v3	0.00804563	-0.0028716	0.0189629	0.147579
z_PEP150226a_v3	-0.00365845	-0.0152971	0.0079802	0.535769
z_PEP150226b_v3	-0.00143441	-0.0119914	0.00912257	0.788865
z_PEP160181_v3	0.00624122	-0.00436856	0.016851	0.247191
z_PEP160182_v3	0.00727064	-0.00287984	0.0174211	0.159203
z_PEP160183_v3	0.00538882	-0.00676026	0.0175379	0.382501
z_PEP160203a_v3	0.0047084	-0.00502225	0.0144391	0.340846
z_PEP160203b_v3	0.00210498	-0.00808886	0.0122988	0.684043
z_PEP160204_v3	0.0133487	0.00218047	0.0245168	0.0194369
z_PEP160205_v3	0.00196785	-0.00582424	0.00975995	0.618768
z_PEP160224_v3	0.00322345	-0.00873505	0.0151819	0.595362
z_PEP160225n3_v3	0.00126674	-0.0103593	0.0128928	0.82996
z_PEP160225n6_v3	-0.00173298	-0.0104706	0.00700463	0.695905
z_PEP160226_v3	0.00107856	-0.0100415	0.0121986	0.84839
z_PEP170204a_v3	0.0079298	-0.00300607	0.0188657	0.154159
z_PEP170204b_v3	0.00619184	-0.00328914	0.0156728	0.199092
z_PEP170226a_v3	-0.00052593	-0.00945854	0.00840668	0.907608
z_PEP170226b_v3	-0.000466401	-0.00957349	0.00864069	0.919594
z_PEP180181_v3	0.00348544	-0.00714508	0.014116	0.518373
z_PEP180182_v3	0.00432258	-0.00680195	0.0154471	0.44414
z_PEP180183_v3	0.00127532	-0.0129242	0.0154748	0.859492
z_PEP180203a_v3	0.000494051	-0.0102553	0.0112434	0.927815
z_PEP180203b_v3	0.00220871	-0.00690385	0.0113213	0.632924
z_PEP180204_v3	0.0085306	-0.001417	0.0184782	0.0923234
z_PEP180205_v3	0.000853704	-0.00688217	0.00858957	0.827816
z_PEP180224_v3	0.00240099	-0.0104857	0.0152877	0.713497
z_PEP180225n3_v3	0.00368624	-0.00759168	0.0149642	0.519657
z_PEP180225n6_v3	-0.00253293	-0.0125837	0.00751784	0.619505
z_PEP180226_v3	0.00493207	-0.00464089	0.014505	0.310596
z_PEP181181_v3	0.00526376	-0.00728073	0.0178082	0.408668
z_PEP181181a_v3	0.00497272	-0.00771949	0.0176649	0.440369
z_PEP181181b_v3	0.00307025	-0.0076312	0.0137717	0.571905
z_PEP181182a_v3	0.00679339	-0.00447298	0.0180598	0.235601
z_PEP181182b_v3	-8.26667e-05	-0.010883	0.0107176	0.987962
z_PEP181183_v3	0.00855139	-0.00573021	0.022833	0.238874
z_PEP181203a_v3	0.0020299	-0.0087661	0.0128259	0.710979
z_PEP181203b_v3	-0.00415467	-0.0145474	0.00623809	0.431114
z_PEP181204a_v3	0.00932804	-0.000357736	0.0190138	0.0589804
z_PEP181204b_v3	0.00412929	-0.0063044	0.014563	0.435744
z_PEP181205a_v3	0.00235002	-0.00599631	0.0106963	0.579071
z_PEP181205b_v3	0.00223516	-0.00777727	0.0122476	0.659987
z_PEP181224_v3	0.00676217	-0.00637059	0.0198949	0.310877
z_PEP181225a_v3	0.00446301	-0.00783006	0.0167561	0.474562
z_PEP181225b_v3	-0.00696149	-0.018061	0.00413801	0.217383
z_PEP181226a_v3	0.00599838	-0.00456188	0.0165586	0.263754
z_PEP181226b_v3	0.0015993	-0.00838885	0.0115875	0.75233
z_PEP190204a_v3	0.000930961	-0.00780297	0.00966489	0.833575
z_PEP190204b_v3	0.00673759	-0.00385783	0.017333	0.211112
z_PEP200181_v3	0.00836063	-0.00357513	0.0202964	0.168566
z_PEP200182_v3	0.00680914	-0.00420909	0.0178274	0.224176
z_PEP200204_v3	0.00757855	-0.00334382	0.0185009	0.172585
z_PEP200226_v3	0.00401835	-0.00487808	0.0129148	0.373841
z_PEP201204_v3	0.00954184	1.54856e-05	0.0190682	0.0496329
z_PEP201226_v3	0.00503397	-0.00378931	0.0138572	0.26164
z_PG341_v3	0.00178852	-0.0100528	0.0136298	0.765955
z_PG361_v3	-0.00252385	-0.0152108	0.0101631	0.695036
z_PG362_v3	-0.0136162	-0.025497	-0.00173546	0.0249408
z_SM_v3	0.00176798	-0.0100622	0.0135982	0.768354
z_PG342_v3	0.000864447	-0.0124085	0.0141374	0.897857
z_SO_v3	-0.00150403	-0.013621	0.0106129	0.806737
z_SP_v3	-0.0120931	-0.0241464	-3.9709e-05	0.0492584
z_PI160160_v3	-0.00969543	-0.0202072	0.000816384	0.0704097
z_PI160_161_v3	-0.0063923	-0.0155501	0.00276548	0.170045
z_PI340_v3	-0.00107337	-0.0104183	0.00827151	0.820904
z_PI341_v3	-0.00648095	-0.0170919	0.00413001	0.229623
z_PI15MHDA_181PI170_181_v3	-0.00708381	-0.0173395	0.00317184	0.174536
z_PI15MHDA_182PI170_182_v3	0.000607013	-0.0110814	0.0122954	0.918468
z_PI180_181_v3	-0.00295517	-0.0145808	0.00867044	0.616479
z_PI362_v3	0.00305154	-0.00848513	0.0145882	0.602261
z_PI181_182_v3	0.00436896	-0.0078495	0.0165874	0.481247
z_PI160_203a_v3	-0.00241194	-0.0143621	0.00953823	0.690829
z_PI160_203b_v3	-0.0102281	-0.0223618	0.00190554	0.0979536
z_PI160_204_v3	-0.00578815	-0.0182938	0.00671751	0.362203
z_PI15MHDA_204PI170_204_v3	0.00191951	-0.0105522	0.0143913	0.761646
z_PI376_v3	-0.00400343	-0.0174366	0.00942972	0.557118
z_PI180_202_v3	0.00771546	-0.00205613	0.017487	0.120945
z_PI180_203a_v3	-0.000419425	-0.00979521	0.00895636	0.929739
z_PI180_203b_v3	-0.00128452	-0.011403	0.00883399	0.802429
z_PI180_204_v3	0.0102414	-0.00145797	0.0219407	0.0858037
z_PI385a_v3	-0.000915223	-0.0136506	0.0118201	0.88736
z_PI385b_v3	-0.00100654	-0.0122862	0.0102731	0.860385
z_PI386_v3	-0.00467292	-0.0176593	0.00831347	0.478495
z_PI396_v3	0.00327297	-0.00850899	0.0150549	0.584168
z_PI180_224_v3	-0.00320764	-0.013414	0.00699869	0.53583
z_PI200_204_v3	0.0115485	-0.000824042	0.023921	0.0671365
z_PI180_225n3_v3	-0.00308527	-0.0155461	0.00937558	0.625652
z_PI180_225n6_v3	-0.00372609	-0.0149254	0.00747324	0.512231
z_PI180_226_v3	0.00172556	-0.0107668	0.0142179	0.785445
z_PS361_v3	0.00932887	-0.00188948	0.0205472	0.102538
z_PS362_v3	0.00572854	-0.00347857	0.0149356	0.221077
z_PS383_v3	0.00742775	-0.00448714	0.0193426	0.220181
z_PS384_v3	0.00406499	-0.00758113	0.0157111	0.491765
z_PS385_v3	0.0074484	-0.0047884	0.0196852	0.231214
z_PS405_v3	0.0110254	-0.00140729	0.0234581	0.0818256
z_PS406_v3	0.00867626	-0.00296837	0.0203209	0.143196
z_S1Pd161_v3	0.0122478	-0.00121896	0.0257146	0.074378
z_S1Pd180_v3	0.0102127	4.56828e-05	0.0203797	0.0489908
z_S1Pd181_v3	0.0101024	-0.0029412	0.0231461	0.128154
z_S1Pd182_v3	0.0105577	-0.000933364	0.0220487	0.0714925
z_SMd171140_v3	0.0073932	-0.00266907	0.0174555	0.148796
z_SMd180140_v3	-0.000448218	-0.0132624	0.012366	0.945035
z_SMd181140SMd161160_v3	0.00942251	-0.00242068	0.0212657	0.118154
z_SMd182140_v3	-0.00292077	-0.0126878	0.0068463	0.555776
z_SMd171160_v3	0.0142394	0.00244533	0.0260334	0.0182593
z_SMd180160_v3	0.00835137	-0.00440474	0.0211075	0.197988
z_SMd181160_v3	0.00789904	-0.00364334	0.0194414	0.178524
z_SMd182160_v3	0.00537715	-0.00684616	0.0176005	0.386419
z_SM343_v3	0.00411614	-0.00678738	0.0150197	0.457191
z_SMd161190_v3	0.00961441	-0.00126346	0.0204923	0.0828404
z_SMd181170SMd171180_v3	0.00962467	-0.00160176	0.0208511	0.0924106
z_SMd182170_v3	0.00847541	-0.00236612	0.0193169	0.124648
z_SM352b_v3	0.00522821	-0.00450239	0.0149588	0.290362
z_SMd181180SMd161200_v3	0.00522595	-0.00588238	0.0163343	0.354383
z_SMd182180_v3	0.00606379	-0.00403901	0.0161666	0.237751
z_SMd182181_v3	0.00919407	-0.0011617	0.0195498	0.0814803
z_SM371_v3	0.00934613	-0.0022539	0.0209462	0.113593
z_SM372_v3	0.0102772	-0.00101031	0.0215648	0.07406
z_SMd181200SMd161220_v3	0.0103124	-0.00108415	0.0217089	0.0758462
z_SMd182200_v3	0.00983762	-0.00182709	0.0215023	0.0977942
z_SM383a_v3	0.0141856	0.0021015	0.0262698	0.0216773
z_SM383b_v3	0.00701242	-0.00404072	0.0180656	0.212164
z_SMd161230SMd171220_v3	0.0107419	-0.000869672	0.0223535	0.0695804
z_SMd180220_v3	0.00416473	-0.00637882	0.0147083	0.43664
z_SMd181220SMd161240_v3	0.00879086	-0.00180121	0.0193829	0.103206
z_SMd161241_v3	0.0136674	0.00265392	0.0246808	0.0153098
z_SMd182220_v3	0.0102689	-0.00166105	0.0221989	0.0911195
z_SM403a_v3	0.0128876	0.000237658	0.0255376	0.0458944
z_SM403b_v3	0.00708406	-0.00257651	0.0167446	0.149594
z_SM410_v3	0.0045808	-0.00746675	0.0166284	0.45396
z_SM411a_v3	0.00890682	-0.00195711	0.0197708	0.107434
z_SMd181230SMd171240_v3	0.0063197	-0.00432597	0.0169654	0.242905
z_SMd171241_v3	0.0124931	0.00176281	0.0232234	0.0227601
z_SMd182230_v3	0.00559524	-0.00543633	0.0166268	0.318153
z_SMd181240_v3	0.012935	0.00329248	0.0225774	0.00885581
z_SMd181241_v3	0.0113624	0.00090386	0.021821	0.0334027
z_SMd182240_v3	0.00923134	-0.0023216	0.0207843	0.116583
z_SM431_v3	0.0134864	0.0025122	0.0244605	0.0163141
z_SMd191241_v3	0.0140841	0.00356514	0.024603	0.00898215
z_SM432b_v3	0.00676643	-0.00384299	0.0173758	0.209772
z_SM432c_v3	0.0107069	-0.000887012	0.0223008	0.0700628
z_SM441_v3	0.01152	0.000708592	0.0223314	0.0369021
z_SM442_v3	0.0162083	0.00599312	0.0264234	0.00204268
z_SM443_v3	0.0148094	0.00348862	0.0261302	0.0106541
z_Sphd161_v3	0.0132427	0.00125974	0.0252257	0.0305151
z_Sphd181_v3	-0.000770926	-0.0126766	0.0111347	0.898443
z_Sphd182_v3	-0.00262381	-0.0149977	0.00975008	0.676062
z_Sulfatided181160OH_v3	0.00411239	-0.0080194	0.0162442	0.504324
z_Sulfatided181160_v3	0.0121624	-0.00158983	0.0259147	0.0826525
z_Sulfatided181180OH_v3	-0.00319484	-0.0171264	0.0107367	0.651359
z_Sulfatided181180_v3	0.00119077	-0.0119967	0.0143782	0.858747
z_Sulfatided181240OH_v3	0.000566243	-0.0125678	0.0137003	0.93228
z_Sulfatided181240_v3	0.0105318	-0.00282995	0.0238936	0.121589
z_Sulfatided181241OH_v3	-0.000306976	-0.0121499	0.011536	0.959253
z_Sulfatided181241_v3	0.00739713	-0.0059389	0.0207332	0.275106
z_TG480NL160_v3	-0.00902879	-0.0188808	0.000823247	0.0722091
z_TG480NL180_v3	-0.0221076	-0.0350965	-0.00911878	0.000962116
z_TG480SIM_v3	-0.0129977	-0.0231469	-0.00284848	0.0123795
z_TG481NL161_v3	-0.00390799	-0.0124516	0.00463564	0.367845
z_TG481NL181_v3	-0.0154279	-0.0274291	-0.00342672	0.0120567
z_TG481SIM_v3	-0.0150797	-0.0255783	-0.00458118	0.00513077
z_TG482NL140_v3	-0.0123958	-0.0231779	-0.0016136	0.0244969
z_TG482NL141_v3	-0.0140382	-0.0250012	-0.00307521	0.0123896
z_TG482NL161_v3	-0.00319691	-0.011957	0.00556313	0.472279
z_TG482NL182_v3	-0.0149946	-0.0265259	-0.00346343	0.0111206
z_TG482SIM_v3	-0.0141788	-0.0256084	-0.00274922	0.0153452
z_TG483NL140_v3	-0.00960208	-0.0196986	0.000494424	0.062184
z_TG483NL161_v3	-0.0052576	-0.0146805	0.00416535	0.272284
z_TG483NL183_v3	-0.0145344	-0.0254556	-0.00361319	0.00939691
z_TG483SIM_v3	-0.0148588	-0.0273719	-0.00234564	0.0202297
z_TG491NL161_v3	-0.00850239	-0.0197962	0.00279144	0.139108
z_TG491NL171_v3	-0.00648242	-0.0166429	0.00367803	0.209609
z_TG491SIM_v3	-0.0148532	-0.0260736	-0.00363286	0.00977358
z_TG500NL180_v3	-0.0179636	-0.029049	-0.00687818	0.00164527
z_TG500SIM_v3	-0.0155618	-0.0267313	-0.00439221	0.00659794
z_TG501NL140_v3	-0.0209128	-0.0330749	-0.00875074	0.000855521
z_TG501NL160_v3	-0.0109868	-0.0219452	-2.84838e-05	0.0494141
z_TG501NL181_v3	-0.0124123	-0.0234596	-0.00136497	0.0278842
z_TG501SIM_v3	-0.00918112	-0.0194872	0.00112496	0.0804566
z_TG502NL140_v3	-0.0114555	-0.0263034	0.00339237	0.129621
z_TG502NL161_v3	0.0010728	-0.00884536	0.010991	0.831183
z_TG502NL181_v3	-0.00421381	-0.015547	0.00711935	0.463994
z_TG502NL182_v3	-0.00475357	-0.0162423	0.00673513	0.415216
z_TG502SIM_v3	-0.00424177	-0.0148242	0.00634068	0.429916
z_TG503NL140_v3	-0.00416776	-0.0180285	0.00969294	0.553604
z_TG503NL141_v3	-0.0095538	-0.0223592	0.00325155	0.142667
z_TG503NL161_v3	0.00577897	-0.00366876	0.0152267	0.228941
z_TG503NL182_v3	-3.97045e-05	-0.0118019	0.0117225	0.994691
z_TG503NL183_v3	-0.00912969	-0.0192283	0.000968952	0.0761094
z_TG503SIM_v3	-0.00795804	-0.0197011	0.003785	0.182771
z_TG504NL140_v3	-0.0073655	-0.0185409	0.00380991	0.195015
z_TG504NL183_v3	-0.0101177	-0.0218105	0.00157515	0.0894467
z_TG504NL204_v3	-0.00383273	-0.0157413	0.00807588	0.526081
z_TG504SIM_v3	-0.00599598	-0.0180103	0.00601838	0.325954
z_TG510NL160_v3	-0.0182692	-0.0307372	-0.0058012	0.00432061
z_TG510SIM_v3	-0.00308767	-0.0152282	0.00905288	0.616296
z_TG511NL170_v3	-0.0113596	-0.0223445	-0.000374709	0.0427611
z_TG511SIM_v3	-0.013376	-0.0245109	-0.00224112	0.0188418
z_TG512NL150_v3	0.00259102	-0.0089718	0.0141538	0.658814
z_TG512NL170_v3	-0.00409763	-0.01386	0.00566473	0.408523
z_TG512NL171_v3	-0.00409763	-0.01386	0.00566473	0.408523
z_TG512SIM_v3	-0.00607124	-0.0171763	0.00503384	0.282034
z_TG521NL180_v3	-0.0200363	-0.0318971	-0.00817556	0.00104765
z_TG521NL181_v3	0.0058102	-0.00655392	0.0181743	0.354923
z_TG521SIM_v3	-0.0164352	-0.0280317	-0.00483867	0.00573961
z_TG522NL160_v3	0.00474882	-0.00849573	0.0179934	0.480062
z_TG522NL182_v3	-0.0124977	-0.0238196	-0.00117578	0.0307052
z_TG522SIM_v3	0.00251827	-0.011551	0.0165876	0.724288
z_TG523NL161_v3	0.0109989	-0.000578382	0.0225761	0.0624535
z_TG523NL182_v3	0.00171121	-0.0134767	0.0168992	0.824267
z_TG523SIM_v3	0.0110311	-0.00459048	0.0266526	0.165162
z_TG524NL161_v3	0.0208314	0.009196	0.0324667	0.000526512
z_TG524NL182_v3	0.0107001	-0.0016255	0.0230257	0.0884123
z_TG524NL183_v3	-0.00480682	-0.0196161	0.0100025	0.522575
z_TG524SIM_v3	0.00954937	-0.00408722	0.023186	0.168683
z_TG525NL183_v3	0.000727089	-0.0123332	0.0137874	0.912624
z_TG525NL204_v3	-0.00270117	-0.0122957	0.00689334	0.579124
z_TG525NL205_v3	-0.00458084	-0.0133158	0.00415413	0.302046
z_TG525SIM_v3	0.00438129	-0.0084913	0.0172539	0.50259
z_TG532NL171_v3	-0.0138133	-0.0262076	-0.00141894	0.0291538
z_TG532NL181_v3	-0.00325621	-0.015504	0.00899162	0.600409
z_TG532SIM_v3	-0.00298569	-0.0158335	0.00986211	0.647017
z_TG540NL180_v3	-0.0244216	-0.0384142	-0.010429	0.000718056
z_TG540SIM_v3	-0.0185997	-0.0310962	-0.00610324	0.00375936
z_TG541NL181_v3	-0.0240462	-0.0385314	-0.00956102	0.00127128
z_TG541SIM_v3	-0.0212817	-0.0346988	-0.00786465	0.00204947
z_TG542NL180_v3	-0.01308	-0.0273527	0.0011927	0.0722104
z_TG542NL201_v3	0.00149587	-0.0106271	0.0136188	0.807858
z_TG542SIM_v3	-0.0087228	-0.0222342	0.00478856	0.204267
z_TG543NL181_v3	0.00986516	-0.00166058	0.0213909	0.0929387
z_TG543NL182_v3	-0.0064078	-0.0208524	0.00803676	0.382442
z_TG543SIM_v3	0.0040276	-0.00861807	0.0166733	0.53039
z_TG544NL182_v3	0.0057634	-0.00724383	0.0187706	0.383
z_TG544NL203_v3	-0.00145983	-0.0139163	0.0109966	0.817332
z_TG544SIM_v3	0.00651725	-0.00632933	0.0193638	0.318046
z_TG545NL183_v3	-0.00340055	-0.0174205	0.0106194	0.632707
z_TG545NL204_v3	-0.00383058	-0.0167834	0.00912222	0.560152
z_TG545SIM_v3	0.00175325	-0.0121694	0.0156759	0.803988
z_TG546NL183_v3	-0.00124888	-0.0148835	0.0123857	0.856735
z_TG546NL204_v3	0.00480146	-0.00937164	0.0189745	0.504579
z_TG546NL205_v3	0.000221496	-0.00959052	0.0100335	0.96451
z_TG546NL226_v3	-0.00642294	-0.0150128	0.00216694	0.141789
z_TG546SIM_v3	-0.00422265	-0.0185246	0.0100793	0.560793
z_TG547NL205_v3	-0.000538521	-0.0107388	0.0096618	0.917123
z_TG547NL226_v3	-0.00169936	-0.0109023	0.00750363	0.71594
z_TG547SIM_v3	-0.00424091	-0.0172388	0.00875701	0.520408
z_TG566NL204_v3	0.0160281	0.00287001	0.0291861	0.0172634
z_TG566NL225a_v3	-0.00229986	-0.0145717	0.00997201	0.71189
z_TG566NL225b_v3	-0.00229986	-0.0145717	0.00997201	0.71189
z_TG566SIM_v3	0.00610065	-0.00764645	0.0198477	0.382266
z_TG567NL204_v3	0.00588832	-0.00639392	0.0181706	0.345311
z_TG567NL205_v3	0.00302898	-0.00719165	0.0132496	0.559323
z_TG567NL225a_v3	-0.000195615	-0.013897	0.0135058	0.97755
z_TG567NL225b_v3	2.17635e-05	-0.0136807	0.0137242	0.997502
z_TG567NL226_v3	0.00529913	-0.00445817	0.0150564	0.285217
z_TG567SIM_v3	0.00388367	-0.0075354	0.0153028	0.502908
z_TG568NL204_v3	-0.000656893	-0.0124993	0.0111855	0.91294
z_TG568NL205_v3	0.000766834	-0.00920826	0.0107419	0.879566
z_TG568NL226_v3	0.00607487	-0.00461304	0.0167628	0.263453
z_TG568SIM_v3	0.00467459	-0.00632908	0.0156783	0.402882
z_TG569NL226_v3	0.00321944	-0.00653846	0.0129773	0.515751
z_TG569SIM_v3	0.000726196	-0.00998678	0.0114392	0.893713
z_TG5810NL226_v3	0.00122211	-0.00842013	0.0108644	0.802742
z_TG5810SIM_v3	0.000630784	-0.00930227	0.0105638	0.900392
z_TG588NL226_v3	0.00621501	-0.00322242	0.0156524	0.195374
z_TG588SIM_v3	0.00740446	-0.00352441	0.0183333	0.182879
z_TG589NL226_v3	0.00590734	-0.00428225	0.0160969	0.254068
z_TG589SIM_v3	0.00458744	-0.00624106	0.015416	0.404183
z_TGO501NL150_v3	-0.00587491	-0.0165079	0.00475804	0.276967
z_TGO501NL160_v3	-0.00379317	-0.0137323	0.00614594	0.452286
z_TGO501NL171_v3	-0.0038799	-0.014768	0.00700824	0.482766
z_TGO501NL181_v3	-0.00598939	-0.0153023	0.00332354	0.205992
z_TGO501SIM_v3	-0.00655955	-0.0158953	0.00277622	0.167267
z_TGO502NL161_v3	0.000485538	-0.0107792	0.0117503	0.932296
z_TGO502NL181_v3	-0.00147904	-0.0128654	0.00990736	0.797947
z_TGO502NL182_v3	-0.00316273	-0.0170177	0.0106923	0.652851
z_TGO502SIM_v3	-0.00709143	-0.0178811	0.00369822	0.196257
z_TGO503NL182_v3	0.00389447	-0.00867306	0.016462	0.541556
z_TGO503SIM_v3	-0.0147485	-0.0243553	-0.00514174	0.00282162
z_TGO520NL160_v3	-0.0182692	-0.0307372	-0.0058012	0.00432061
z_TGO520SIM_v3	-0.00308767	-0.0152282	0.00905288	0.616296
z_TGO521NL160_v3	-0.008919	-0.0200255	0.00218748	0.114778
z_TGO521NL181_v3	-0.00977544	-0.0202227	0.00067183	0.0664757
z_TGO521SIM_v3	-0.0119621	-0.0230077	-0.000916561	0.0339592
z_TGO522NL160_v3	0.000390035	-0.0109517	0.0117318	0.945959
z_TGO522NL171_v3	-0.000535841	-0.012467	0.0113953	0.929462
z_TGO522NL181_v3	0.00167893	-0.00918979	0.0125476	0.760798
z_TGO522SIM_v3	-0.00162523	-0.0129752	0.00972479	0.777787
z_TGO542NL171_v3	0.00240338	-0.0102406	0.0150474	0.707971
z_TGO542NL181_v3	-0.00264049	-0.0147425	0.00946149	0.66724
z_TGO542SIM_v3	-0.00713583	-0.0192639	0.00499225	0.247094
z_TGO543NL171_v3	0.00665119	-0.00571499	0.0190174	0.289875
z_TGO543NL181_v3	0.00956182	-0.00232478	0.0214484	0.114163
z_TGO543SIM_v3	-0.00621647	-0.0194517	0.00701871	0.355159
z_TGO544NL171_v3	0.00560588	-0.00656998	0.0177817	0.364725
z_TGO544NL182_v3	0.00790207	-0.00493758	0.0207417	0.226101
z_TGO544SIM_v3	-0.0163637	-0.0276797	-0.00504781	0.00484431
z_Ubiquinone_v3	0.00548107	-0.00653352	0.0174957	0.369115

## Sheet: Paired t - tests 
Lipid	Mean change	SE change	p-value change	corr
AC120	-2.16432	0.861419	0.0128818	0.29397
AC130	-1.0267	0.320125	0.0015909	0.404558
AC140	-0.544726	0.249131	0.030091	0.288277
AC141	-3.43066	0.912977	0.00023266	0.230818
AC142	-1.79911	0.42051	3.07627e-05	0.208368
AC150a	-0.113148	0.0366933	0.00237689	0.381386
AC150b	-0.0735702	0.0176625	4.85191e-05	0.524861
AC160	-5.01557	0.905569	1.08782e-07	0.396654
AC161	-1.33271	0.296435	1.24986e-05	0.255271
AC170a	-0.193548	0.0336678	3.86515e-08	0.38982
AC170b	-0.102849	0.0208795	1.9183e-06	0.318677
AC180	-1.70298	0.304309	8.21184e-08	0.405614
AC181	-7.78197	1.54689	1.19283e-06	0.457611
AC182	-2.78056	0.435523	1.46447e-09	0.605081
CE140	-369.214	420.008	0.380558	0.427136
CE150	-1491.6	235.077	1.80304e-09	0.580608
CE160	10118.4	3105.44	0.00134388	0.257218
CE161	11512.9	2464.71	5.90738e-06	0.583908
CE162	-166.393	37.4588	1.5711e-05	0.382614
CE170	675.843	230.61	0.00382845	0.640802
CE171	770.646	276.955	0.00597828	0.616428
CE180	2869.15	568.499	1.10793e-06	0.549967
CE181	113189	12237	7.24801e-17	0.332729
CE182	-93903.2	20597.3	9.56138e-06	0.275547
CE183	-10755.3	3343.43	0.00154129	0.4761
CE200	82.3525	12.5441	5.70032e-10	0.491437
CE201	128.956	21.5186	1.12793e-08	0.470486
CE202	305.961	42.9569	2.6053e-11	0.456316
CE203	-2260.9	1490.67	0.131126	0.428266
CE204	-45117.1	3766.85	1.36074e-24	0.575309
CE205	-6160.19	816.058	2.23683e-12	0.674269
CE220	17.1962	3.74587	8.35065e-06	0.477196
CE221	19.1434	6.10067	0.00199355	0.39104
CE224	-178.23	50.7866	0.000569572	0.509552
CE225n3	-1240.53	147.651	1.394e-14	0.626192
CE225n6	-560.29	160.848	0.00062399	0.580714
CE226	-23426.4	3153.33	4.46787e-12	0.619349
CE240	20.5693	3.68536	9.01188e-08	0.384789
CE241	11.7466	3.65733	0.00156696	0.54004
CE244	40.5716	6.0768	3.04352e-10	0.694633
CE245	140.671	17.6259	1.75911e-13	0.44387
CE246	-60.0036	13.928	2.72494e-05	0.468193
COH	54332.1	6088.87	5.61273e-16	0.338121
Cer1Pd181160	5.36834	0.40792	5.03732e-28	0.335055
Cerd161160	3.72555	0.76758	2.64965e-06	0.548114
Cerd161180	6.69734	0.806113	2.46098e-14	0.519904
Cerd161200	6.55842	0.634239	6.63906e-20	0.651776
Cerd161220	48.1224	3.65755	5.14887e-28	0.651092
Cerd161230	26.8401	2.65163	2.74076e-19	0.746165
Cerd161240	79.6113	8.56712	5.52777e-17	0.634349
Cerd161241	28.0358	2.25606	8.007e-26	0.781042
Cerd171160	3.17925	0.561685	5.99556e-08	0.332932
Cerd171180	1.27774	0.288049	1.60737e-05	0.297722
Cerd171200	1.2114	0.156875	8.12992e-13	0.508899
Cerd171220	16.7976	1.7731	1.7569e-17	0.679834
Cerd171230	13.4589	1.63647	4.08631e-14	0.700811
Cerd171240	32.3117	3.93382	4.35434e-14	0.66389
Cerd171241	22.3418	2.96206	2.317e-12	0.687538
Cerd181140	1.17098	0.371203	0.00188903	0.479782
Cerd181160	86.781	6.05692	2.06635e-31	0.415422
Cerd181170	1.57671	0.681077	0.0217593	0.194289
Cerd181180	22.2112	2.21757	5.44114e-19	0.538654
Cerd181190	0.410535	0.10166	8.00952e-05	0.355478
Cerd181200	65.0446	5.06196	4.02197e-27	0.607549
Cerd181210	8.50497	1.14134	3.92069e-12	0.648789
Cerd181220	494.656	34.0234	5.06244e-32	0.685727
Cerd181230	426.686	32.2821	3.43811e-28	0.612621
Cerd181240	817.133	62.4635	8.51679e-28	0.597126
Cerd181241	472.512	45.7507	7.2079e-20	0.599297
Cerd181260	3.32162	1.1355	0.00389262	0.375317
Cerd182140	0.313249	0.179038	0.0819175	0.463078
Cerd182160	4.7424	1.05534	1.26085e-05	0.324284
Cerd182170	-0.040166	0.115224	0.727812	-0.0144492
Cerd182180	3.65426	0.559894	6.84613e-10	0.535539
Cerd182210	0.390136	0.124101	0.0019566	0.308145
Cerd182220	63.5706	6.23691	1.73561e-19	0.715772
Cerd182230	61.2297	6.12015	6.12406e-19	0.705743
Cerd182240	129.403	18.2264	2.91685e-11	0.592319
Cerd182241	57.901	7.21386	1.34152e-13	0.677359
Cerd182260	-0.232483	0.316262	0.463255	0.333291
Cerd191160	0.0873184	0.11097	0.432414	0.382513
Cerd191180	0.151721	0.136071	0.266354	0.47533
Cerd191200	0.27833	0.317472	0.381833	0.489989
Cerd191220	7.97559	2.81045	0.00507582	0.660286
Cerd191230	6.99129	2.55663	0.00688511	0.772222
Cerd191240	10.1581	6.1899	0.102558	0.658737
Cerd191241	1.8478	5.57564	0.74073	0.715753
Cerd191260	-0.759799	0.22392	0.0008525	0.29877
Cerd201220	1.68473	0.39976	3.98647e-05	0.518626
Cerd201230	1.76616	0.324686	1.75571e-07	0.487229
Cerd201240	3.51725	0.701671	1.29507e-06	0.533034
Cerd201241	2.84078	0.56212	1.074e-06	0.51946
Cerd201260	-0.286196	0.264027	0.279854	0.223663
Cerm180200	17.3325	1.27581	2.93199e-29	0.597892
Cerm180220	42.1714	2.74111	1.84709e-34	0.600208
Cerm180230	17.0188	1.26268	6.00037e-29	0.559912
Cerm180240	36.0693	2.80291	3.5463e-27	0.520672
Cerm180241	32.1971	2.27532	6.72621e-31	0.555463
Cerm181180	3.48532	0.281737	9.86937e-26	0.480359
Cerm181200	23.7311	1.67348	5.50347e-31	0.626575
Cerm181220	63.3383	4.75521	1.73357e-28	0.570548
Cerm181230	26.4097	1.97032	9.88191e-29	0.554624
Cerm181240	44.7129	3.58023	4.48719e-26	0.578403
Cerm181241	43.7242	3.53037	8.96628e-26	0.559292
DE160	-6.14816	7.49945	0.413424	0.0466227
DE181	27.8854	28.1853	0.323838	0.311716
DE182	-805.432	183.382	1.92836e-05	0.32644
DE204	-323.554	42.4165	1.40986e-12	0.489684
DE205	-56.1132	15.8323	0.000503743	0.505503
DE226	-53.4226	23.04	0.0215546	0.434049
DG140_160	364.588	38.5919	2.07662e-17	0.435248
DG140_182	1090.56	93.8379	1.44931e-23	0.597862
DG160_160	5159.42	398.123	1.93162e-27	0.551784
DG160_161	758.502	74.9438	2.76161e-19	0.478731
DG160_181	24397.1	1602.2	5.23686e-34	0.522462
DG160_182	8112.1	559.892	7.06436e-32	0.668635
DG160_204	717.594	71.974	7.31238e-19	0.624147
DG160_225	250.992	21.781	2.78224e-23	0.611809
DG160_226	632.683	59.3323	8.07572e-21	0.622014
DG161_181	3233.67	249.636	2.00815e-27	0.547792
DG180_181	5368.23	473.119	8.98573e-23	0.389313
DG180_182	2425.14	215.031	1.41248e-22	0.520526
DG180_204	264.752	45.4141	2.57762e-08	0.417028
DG181_181	27985.6	2400.79	1.14801e-23	0.437536
DG181_182	11698.3	1137.8	9.75067e-20	0.529127
DG181_183	1342.4	154.483	2.45833e-15	0.411922
DG181_203	595.46	64.888	1.14782e-16	0.524931
DG181_204	1187.47	162.042	7.97534e-12	0.592699
DG181_205	121.433	37.3821	0.00138993	0.398479
DG182_182	1723.25	281.13	5.57294e-09	0.665372
DG182_204	397.611	95.0511	4.51882e-05	0.674288
DG182_226	281.536	52.1278	2.11394e-07	0.627349
GM1d181160	3.6305	1.21462	0.00319709	0.480737
GM3d181160	79.7586	13.0448	6.03851e-09	0.371999
GM3d181180	-18.9283	4.84737	0.000133935	0.451949
GM3d181200	-15.2134	2.63727	3.50092e-08	0.45696
GM3d181220	41.903	9.7586	2.8874e-05	0.552574
GM3d181240	2.37051	4.39605	0.590401	0.560739
GM3d181241	20.2786	9.57592	0.0356	0.526798
Hex2Cerd161160	15.4794	2.62339	1.80348e-08	0.757769
Hex2Cerd161241	-0.359876	0.703631	0.609669	0.509903
Hex2Cerd181160	184.047	51.3994	0.00044248	0.594146
Hex2Cerd181180	0.576396	0.841258	0.494139	0.316873
Hex2Cerd181200	0.676561	0.820875	0.410938	0.361237
Hex2Cerd181220	3.97321	2.36245	0.0943669	0.572202
Hex2Cerd181240	2.73217	5.4529	0.61696	0.420912
Hex2Cerd181241	5.88532	8.63506	0.496408	0.598518
Hex2Cerd182160	17.9166	3.27047	1.45693e-07	0.661282
Hex2Cerd182241	-7.15328	1.7365	5.82449e-05	0.713553
Hex3Cerd181160	52.3647	13.0415	8.76153e-05	0.473867
Hex3Cerd181180	-6.02068	3.92026	0.126376	0.325298
Hex3Cerd181200	-2.12675	1.26872	0.095446	0.262944
Hex3Cerd181220	0.75812	2.64454	0.774697	0.4994
Hex3Cerd181240	-4.54561	2.25019	0.0448803	0.430567
Hex3Cerd181241	-15.8707	4.89561	0.00141923	0.460444
HexCerd161180	7.24	0.870501	2.33235e-14	0.355058
HexCerd161200	8.65532	0.887902	3.04885e-18	0.549349
HexCerd161220	18.5211	1.47216	2.42552e-26	0.650899
HexCerd161240	12.5553	1.26657	1.0581e-18	0.626478
HexCerd181160	55.315	12.3881	1.42179e-05	0.648117
HexCerd181180	35.593	2.93843	5.51533e-25	0.543685
HexCerd181200	30.8432	2.28142	5.60588e-29	0.647347
HexCerd181220	200.171	15.9373	2.79143e-26	0.621455
HexCerd181240	280.473	28.269	1.00031e-18	0.611586
HexCerd181241	177.973	16.1968	9.57123e-22	0.675876
HexCerd182180	4.64229	0.582818	1.93124e-13	0.318156
HexCerd182200	5.11154	0.547169	4.05199e-17	0.393235
HexCerd182220	16.333	1.80475	2.54273e-16	0.638181
HexCerd182240	33.0565	3.91437	1.07167e-14	0.618988
LPC140sn1	-32.7874	19.8525	0.100399	0.470128
LPC140sn2	-8.70558	5.80302	0.135349	0.464681
LPC150sn1	-130.284	10.1981	6.61539e-27	0.552365
LPC150sn2	-51.8939	4.07696	9.0404e-27	0.546176
LPC15MHDAsn1104_sn1	-95.48	6.17165	1.04688e-34	0.594085
LPC15MHDAsn1LPC170	-205.943	12.5353	1.93257e-37	0.551606
LPC15MHDAsn2	-43.322	2.7273	6.84815e-36	0.610621
LPC160sn1	-9734.41	789.131	1.24847e-25	0.477722
LPC160sn2	-2673.24	214.709	5.79592e-26	0.426746
LPC161sn1	-133.16	26.4648	1.1881e-06	0.473459
LPC161sn2	-6.70443	6.5286	0.305854	0.53608
LPC170sn1	-213.583	12.489	2.43793e-39	0.458586
LPC171asn1104_sn1	-21.2298	1.82364	1.27162e-23	0.538484
LPC171sn1aLPC171	-35.2418	3.04592	2.04019e-23	0.543825
LPC171sn1b	-10.7594	0.873188	1.4822e-25	0.656371
LPC171sn2a	-7.63816	0.925293	3.39883e-14	0.551426
LPC180sn1	-3919.02	258.702	8.80526e-34	0.46099
LPC180sn2	-1200.83	83.0258	8.35997e-32	0.399037
LPC181sn1	-2530.26	219.626	2.83157e-23	0.415447
LPC181sn2	-585.044	79.6785	7.34556e-12	0.428919
LPC182sn1	-4089.58	423.349	5.35323e-18	0.219075
LPC182sn2	-872.404	141.001	4.13332e-09	0.208337
LPC183asn1104_sn1	-21.5244	5.19421	5.28406e-05	0.239792
LPC183sn1aLPC183s	-39.1155	8.93137	2.03114e-05	0.252074
LPC183sn1b	-36.4155	5.56861	6.39349e-10	0.259177
LPC183sn2a	-3.44623	3.14117	0.27408	0.296196
LPC190asn1104_sn1	-3.86973	0.253237	4.8411e-34	0.565898
LPC190sn1aLPC190	-9.65005	0.61295	1.73137e-35	0.505792
LPC190sn1b	-15.8983	1.0656	4.02731e-33	0.468735
LPC190sn2a	-1.5952	0.119539	1.62183e-28	0.502272
LPC191a	-3.00455	0.275507	1.74576e-21	0.482945
LPC191b	-11.5286	0.792558	5.45146e-32	0.46621
LPC191c	-0.72435	0.0634938	7.77375e-23	0.543049
LPC200sn1	-18.8404	1.66907	1.40981e-22	0.541279
LPC200sn2	-7.54416	0.679957	5.02524e-22	0.527545
LPC201sn1	-28.9485	2.71248	7.61602e-21	0.470051
LPC201sn2	-8.50161	0.898973	2.02696e-17	0.504742
LPC202sn1	-20.851	3.46661	1.0076e-08	0.383957
LPC202sn2	0.668421	1.6372	0.683568	0.479818
LPC203sn1	-157.665	34.8151	1.08782e-05	0.300451
LPC203sn2	14.6671	14.7648	0.321882	0.413181
LPC204sn1	-763.896	62.2024	1.79974e-25	0.334182
LPC204sn2	-199.871	24.1025	2.70563e-14	0.412393
LPC205sn1	-80.3199	9.7244	3.30221e-14	0.58777
LPC205sn2	-24.2857	4.2793	5.56895e-08	0.581942
LPC220sn1	-3.59234	0.460386	5.15921e-13	0.528754
LPC220sn2	-1.26342	0.18065	5.36318e-11	0.523704
LPC221sn1	-2.43753	0.350301	6.53066e-11	0.435009
LPC221sn2	-0.868766	0.154782	7.62097e-08	0.457564
LPC224sn1	-6.941	1.85407	0.000245016	0.449763
LPC224sn2	0.348357	1.17343	0.766914	0.568069
LPC225n3sn1104_sn1	-28.5944	3.6084	2.46219e-13	0.445432
LPC225sn1n3LPC225	-29.7893	5.17935	3.81174e-08	0.424409
LPC225sn1n6	-1.81125	2.47765	0.465724	0.564073
LPC225sn2n3	-10.9085	2.31575	4.97619e-06	0.524936
LPC226sn1	-170.574	25.8805	4.84521e-10	0.42952
LPC226sn2	-34.8087	10.7125	0.00138433	0.545668
LPC240sn1	-4.43303	0.906971	2.27572e-06	0.474855
LPC240sn2	-2.31399	0.435828	3.26682e-07	0.468635
LPC260sn1	-2.32762	0.550756	3.80991e-05	0.401967
LPC260sn2	-1.43948	0.282726	9.03219e-07	0.278308
LPCO160	-189.817	11.9735	8.41837e-36	0.458252
LPCO180	-35.5235	3.40954	3.9899e-20	0.51873
LPCO181	-96.0692	7.12127	5.53522e-29	0.420307
LPCO200	-8.67025	0.844277	1.05451e-19	0.71126
LPCO201	-6.42022	0.894773	1.9047e-11	0.435146
LPCO220	-5.25068	1.24928	4.17322e-05	0.683117
LPCO221	-13.1093	1.30579	4.67773e-19	0.680821
LPCO240	-3.78092	3.03832	0.214994	0.724443
LPCO241	-10.4552	3.12127	0.000988822	0.71879
LPCO242	-6.96942	0.76201	1.39159e-16	0.70802
LPCP160	-89.8933	4.4423	6.44361e-48	0.4059
LPCP170a	-3.97234	0.248534	4.87749e-36	0.616007
LPCP170b	-2.15792	0.129728	7.10259e-38	0.503038
LPCP180	-12.2265	0.758261	1.41832e-36	0.552399
LPCP181	-9.66155	0.549327	1.55303e-40	0.501825
LPCP200	-0.468699	0.0512775	1.44189e-16	0.473214
LPE160sn1	154.3	29.4195	4.42905e-07	0.43091
LPE160sn2	40.7837	9.84095	5.27626e-05	0.390714
LPE170sn1	-0.401355	5.19498	0.938505	0.228464
LPE170sn2	-0.926522	2.50893	0.712353	0.18939
LPE180sn1	95.2423	25.1305	0.000206424	0.372092
LPE180sn2	29.4982	10.43	0.00522084	0.315378
LPE181sn1	-81.5822	38.2188	0.034169	0.245347
LPE181sn2	-26.2344	19.8941	0.188972	0.227735
LPE182sn1	-150.425	44.4062	0.000869268	0.288494
LPE182sn2	-30.6491	22.4972	0.174819	0.287942
LPE204sn1	-72.0425	11.7106	5.06098e-09	0.320279
LPE204sn2	-13.3045	6.37025	0.0381798	0.333665
LPE226sn1	-38.3288	12.4676	0.00244463	0.431093
LPE226sn2	-0.865968	7.22201	0.904693	0.500438
LPEP160	-5.34159	2.87478	0.0648173	0.18154
LPEP180	-11.6482	3.53579	0.00119137	0.35416
LPEP181	-3.09974	1.7242	0.0739147	0.17476
LPEP200	-0.91889	0.478999	0.0566753	0.317569
LPI180sn1	24.8057	7.21458	0.000729887	0.118994
LPI180sn2	7.17535	2.51742	0.0048869	-0.0219807
LPI181sn1	22.2147	8.20128	0.0074182	0.181206
LPI181sn2	8.96398	3.02691	0.00348256	0.192115
LPI182sn1	38.0415	12.1343	0.00201204	0.381352
LPI182sn2	17.8854	4.24102	3.9406e-05	0.435948
LPI204sn1	-22.5325	9.98237	0.0252161	0.188755
LPI204sn2	4.10688	4.83818	0.397113	0.174274
PC140_160	899.872	119.534	2.51961e-12	0.499477
PC140_204	220.678	31.096	2.96822e-11	0.55045
PC140_226	140.657	20.6244	1.38688e-10	0.567463
PC150_203	183.046	23.5469	6.00358e-13	0.484451
PC150_204	40.612	20.1492	0.0453582	0.65916
PC150_226	53.0795	16.5374	0.00157803	0.616152
PC15MHDA_181	170.57	30.0304	5.4398e-08	0.690552
PC15MHDA_182	242.774	73.7237	0.00119682	0.532238
PC15MHDA_204	-35.7478	31.2703	0.254505	0.658242
PC15MHDA_226	-54.7134	17.1818	0.00171429	0.65327
PC160_160	1552.79	185.106	1.50966e-14	0.435723
PC160_180	-0.941877	20.5895	0.963565	0.488416
PC160_181	26766.8	2064.57	1.86195e-27	0.446042
PC160_182	27600.3	2367.16	1.1263e-23	0.262818
PC160_183a	2872.49	220.961	1.47183e-27	0.469422
PC160_183b	980.696	103.885	2.1718e-17	0.452895
PC160_203a	16811.9	1190.14	7.92879e-31	0.471218
PC160_203b	1035.03	103.541	6.17649e-19	0.627782
PC160_204	1110.75	1321.07	0.4016	0.45554
PC160_205	1464.55	428.157	0.000775857	0.594528
PC160_226	8447.63	1403.66	9.89757e-09	0.541212
PC161_182	1008.47	82.1773	1.9102e-25	0.505133
PC161_204	125.652	22.4664	8.34617e-08	0.552143
PC161_226	83.3938	17.0608	2.27263e-06	0.562923
PC170_181	277.281	43.7792	1.91657e-09	0.520048
PC170_182	332.64	98.8741	0.000940884	0.351992
PC170_204	-126.471	28.2529	1.35614e-05	0.654933
PC170_226	-53.629	15.0004	0.000451314	0.574176
PC171_182	69.2864	8.8786	5.0282e-13	0.412066
PC180_181	3686.29	476.563	7.52886e-13	0.529837
PC180_182	7610.91	1427.93	2.96249e-07	0.302156
PC180_203	2194.52	367.434	1.25053e-08	0.562169
PC180_204	-3459.46	612.099	6.24942e-08	0.630382
PC180_224	261.142	50.1551	5.29445e-07	0.589299
PC180_225n3PC201_204	-72.7676	60.9119	0.233827	0.527674
PC180_225n6	234.567	38.073	4.73812e-09	0.63271
PC180_226	-999.374	217.929	8.52898e-06	0.683016
PC181_181	3425.41	383.626	5.41198e-16	0.36631
PC181_182	3557.67	705.285	1.12114e-06	0.382534
PC181_203	628.759	92.3231	1.46142e-10	0.490501
PC181_226a	498.882	103.231	2.90831e-06	0.488619
PC181_226b	-51.0404	12.4071	5.95379e-05	0.527085
PC182_182	1294.58	321.815	8.5093e-05	0.328549
PC182_205	-6.73451	10.294	0.513822	0.458016
PC200_204	-11.8212	4.94634	0.0179038	0.501029
PC280	153.807	33.1929	6.94212e-06	0.373652
PC310a	155.059	28.6578	2.01668e-07	0.499401
PC310b	-5.27756	8.67596	0.54377	0.577168
PC321	6431.17	548.953	7.78102e-24	0.606349
PC322	1411.5	111.487	1.42303e-26	0.482284
PC330a	57.4988	14.1935	7.61969e-05	0.632874
PC330b	-1.42624	3.26219	0.662498	0.475953
PC331	776.596	80.669	6.6154e-18	0.622594
PC332	677.347	72.8254	5.24476e-17	0.503268
PC345	11.7942	3.9642	0.00333741	0.542832
PC355	3.05436	3.28986	0.354456	0.617297
PC360	32.4655	2.58388	2.70463e-26	0.656244
PC366a	10.5502	4.44381	0.0186613	0.595305
PC382	405.857	46.9074	3.00568e-15	0.433579
PC384b	748.651	105.859	3.40682e-11	0.535797
PC385a	-1308.27	276.352	4.49044e-06	0.488062
PC385b	834.653	285.177	0.00387439	0.513503
PC386a	-169.359	91.2149	0.0650157	0.513336
PC387c	31.1093	5.40445	3.72388e-08	0.587152
PC395a	-6.63799	2.57524	0.0107625	0.642332
PC395b	-18.1757	3.94816	7.90237e-06	0.531669
PC4010	5.85173	2.14684	0.00706051	0.356894
PC407a	37.225	7.9823	6.1062e-06	0.331479
PC408	31.3175	13.5574	0.0220424	0.492748
PC4412	2.82776	0.710502	0.000100645	0.475843
PCO160160	147.37	19.155	9.61183e-13	0.641007
PCO160203	281.976	33.067	6.47153e-15	0.645697
PCO160204	428.768	192.176	0.0269286	0.620591
PCO160226	348.294	41.1504	9.54173e-15	0.705032
PCO180181	36.0321	4.75103	1.82133e-12	0.761655
PCO180182	120.662	15.8317	1.46415e-12	0.607369
PCO180204	216.306	45.541	4.1936e-06	0.74626
PCO180226	227.438	21.4968	1.39281e-20	0.73857
PCO181181	32.2864	10.0272	0.00152597	0.605599
PCO181182	224.44	48.9879	8.68474e-06	0.580952
PCO321	-1.27461	0.84423	0.13288	0.689501
PCO322	-0.0229582	0.609382	0.96999	0.639744
PCO341	640.124	96.61	4.00749e-10	0.56536
PCO342	334.857	70.3303	3.98724e-06	0.561222
PCO344	7.82186	4.10184	0.0581515	0.453095
PCO354	-5.26988	1.98799	0.00875681	0.56019
PCO360	6.2731	0.750485	1.85837e-14	0.59144
PCO365	-21.0374	16.625	0.20739	0.541793
PCO385	-172.058	72.0856	0.0180473	0.570028
PCO405	81.4058	13.9254	2.37707e-08	0.681255
PCO407a	169.913	21.9443	7.19362e-13	0.613259
PCO407b	11.0465	8.82653	0.212399	0.754131
PCP150204a	-0.207175	0.604068	0.732035	0.356121
PCP150204b	-2.65702	0.791259	0.000962351	0.436601
PCP160140	0.661012	1.42511	0.643337	0.709263
PCP160160	63.8494	24.5823	0.0101846	0.664559
PCP160161	-15.4424	6.77041	0.0237478	0.754435
PCP160181	-100.057	33.1906	0.0029512	0.670302
PCP160182	-332.924	117.024	0.00496595	0.551343
PCP160183	-6.7294	8.40162	0.424226	0.312389
PCP160204	-44.6525	100.594	0.657664	0.584527
PCP160205	-20.6559	15.6456	0.188459	0.438147
PCP160226	58.5108	18.377	0.00171693	0.685075
PCP170204a	-28.2589	6.30875	1.33969e-05	0.664206
PCP170204b	-14.5518	4.36101	0.00103289	0.530924
PCP180182	-33.4302	18.26	0.0688132	0.556343
PCP180204	-28.8474	16.3971	0.0802537	0.65662
PCP180225	20.0505	5.23046	0.000175456	0.637363
PCP180226	39.6797	9.35252	3.55607e-05	0.725264
PCP181181	-31.4884	11.7973	0.00831223	0.70834
PCP181226	7.96517	3.83686	0.0393514	0.725522
PCP200204	6.17256	0.919775	2.55376e-10	0.72763
PCP352a	-12.853	8.44382	0.129749	0.513128
PCP352b	-11.5293	5.72644	0.0456021	0.340682
PCP363	-6.78202	31.8186	0.831458	0.498441
PCP385a	-125.375	45.7952	0.0068186	0.644792
PCP385b	-4.63937	10.8845	0.670453	0.478904
PE15MHDA_181	30.7653	2.48073	8.03044e-26	0.41079
PE15MHDA_182	76.0356	5.00438	6.53548e-34	0.539594
PE15MHDA_204	57.7932	4.43328	1.39315e-27	0.576511
PE15MHDA_226	88.0441	7.55774	1.38393e-23	0.535161
PE160_160	35.3001	4.05947	2.29937e-15	0.277792
PE160_161	438.557	34.5854	1.24734e-26	0.568749
PE160_181	4594.92	208.094	9.87027e-53	0.504289
PE160_182	10092.7	445.344	3.27275e-54	0.646409
PE160_183a	474.074	26.6876	4.17241e-41	0.557623
PE160_183b	205.683	14.6996	2.16169e-30	0.49959
PE160_203	1957.88	97.5285	1.72744e-47	0.560904
PE160_204	7460.36	336.514	5.86248e-53	0.596294
PE160_205	305.682	25.5566	1.51811e-24	0.476102
PE160_226	10604	588.227	6.39283e-42	0.546006
PE161_182	104.546	6.70591	5.50522e-35	0.598561
PE161_204	67.2968	4.07	1.35114e-37	0.591786
PE170_181	86.1076	5.37126	2.61442e-36	0.361264
PE170_182	243.678	13.4241	2.8807e-42	0.54946
PE170_204	132.06	8.76599	1.75385e-33	0.556872
PE170_226	126.777	8.87693	3.55358e-31	0.592093
PE180_181	1454.85	96.59	1.56356e-33	0.277206
PE180_182	10070.8	517.815	8.27583e-46	0.549456
PE180_203a	1121.48	64.335	3.48848e-40	0.586808
PE180_203b	57.8582	4.18069	6.68185e-30	0.590716
PE180_204	5912.63	374.269	1.21177e-35	0.590877
PE180_224	199.127	15.6487	9.27236e-27	0.576735
PE180_225n3	597.991	37.1518	1.99838e-36	0.57493
PE180_225n6	467.409	32.5921	2.12507e-31	0.647217
PE180_226	5011.09	322.639	7.00687e-35	0.590804
PE181_181	1603.2	136.762	7.41569e-24	0.317789
PE181_182	3555.56	205.117	5.42941e-40	0.498895
PE181_226a	1963.23	96.0708	2.464e-48	0.568291
PE181_226b	369.171	24.2977	7.4979e-34	0.466879
PE200_204	9.04647	1.25869	1.83717e-11	0.286876
PE360	1.03251	0.400542	0.0107575	0.115375
PE385a	2772.11	136.46	3.98029e-48	0.543948
PE385b	1557.44	101.724	3.01903e-34	0.522557
PEO160182	55.7895	5.34838	3.68355e-20	0.440445
PEO160203	18.4901	2.02156	1.48706e-16	0.447915
PEO160204	117.28	24.2996	2.99007e-06	0.53338
PEO160224	17.0615	1.74528	2.7746e-18	0.542762
PEO160226	88.8619	15.0147	1.6615e-08	0.621132
PEO180204	73.3508	17.9552	6.66495e-05	0.472468
PEO180225	31.6809	4.09574	7.84162e-13	0.510586
PEO180226	64.3017	10.3979	4.2414e-09	0.558583
PEO181182	41.628	4.51268	8.78966e-17	0.413263
PEO181226	31.555	7.50524	4.15959e-05	0.545819
PEO341	46.3772	4.7087	1.59253e-18	0.385581
PEO365	24.1013	6.77418	0.000480689	0.525313
PEO385a	113.009	19.3293	2.36902e-08	0.473392
PEO385b	34.3682	5.41097	1.77988e-09	0.490934
PEP150204a	5.24889	1.98196	0.00881991	0.438799
PEP150204b	3.26574	1.49872	0.0306516	0.366292
PEP150226a	0.614179	2.99631	0.837824	0.465168
PEP150226b	10.3446	1.70208	7.29622e-09	0.488618
PEP160181	105.601	25.1409	4.21705e-05	0.396828
PEP160182	663.503	82.3639	1.15139e-13	0.574561
PEP160183	27.0944	3.87779	5.48665e-11	0.445218
PEP160203a	80.349	13.2612	8.10331e-09	0.555688
PEP160203b	6.22856	1.17287	3.32437e-07	0.456324
PEP160204	142.344	175.251	0.417753	0.551639
PEP160205	65.7345	42.2398	0.121442	0.558418
PEP160224	43.5573	11.3802	0.000179422	0.521502
PEP160225n3	170.755	31.9784	2.84606e-07	0.5876
PEP160225n6	97.66	9.5713	1.697e-19	0.682835
PEP160226	1871.1	171.988	2.07415e-21	0.634951
PEP170204a	-19.9571	15.8454	0.209513	0.572096
PEP170204b	-40.3216	16.7467	0.0170791	0.63625
PEP170226a	44.7229	8.52894	4.50133e-07	0.688302
PEP170226b	36.0192	9.0336	9.78495e-05	0.638029
PEP180181	115.838	28.3527	6.65396e-05	0.543373
PEP180182	611.469	95.008	1.11305e-09	0.551244
PEP180183	16.5619	3.60496	8.22674e-06	0.336158
PEP180203a	50.3282	13.0109	0.000154217	0.580736
PEP180203b	10.9211	3.47401	0.00196038	0.614078
PEP180204	-538.644	216.106	0.013604	0.647903
PEP180205	-1.60669	55.1854	0.976806	0.605931
PEP180224	11.984	9.70019	0.218302	0.394997
PEP180225n3	46.0644	15.1532	0.00272765	0.566637
PEP180225n6	39.4534	5.79516	1.48113e-10	0.517331
PEP180226	520.119	92.3072	6.79952e-08	0.675542
PEP181181	124.694	22.3393	8.81042e-08	0.547356
PEP181181a	108.546	20.1449	2.24571e-07	0.55738
PEP181181b	13.1868	2.81319	5.5217e-06	0.420086
PEP181182a	372.574	61.344	7.45141e-09	0.532261
PEP181182b	59.9681	11.2204	2.79761e-07	0.447195
PEP181183	13.3437	3.15233	3.69845e-05	0.340482
PEP181203a	59.4678	10.2383	2.8918e-08	0.518706
PEP181203b	5.93546	1.28449	7.38819e-06	0.444185
PEP181204a	-192.599	145.297	0.186694	0.644835
PEP181204b	-12.9343	24.6994	0.601166	0.449221
PEP181205a	56.2203	41.9905	0.182336	0.5685
PEP181205b	2.41705	4.40512	0.583921	0.443013
PEP181224	9.21731	3.34073	0.00640605	0.40842
PEP181225a	34.7771	9.54991	0.000356115	0.4989
PEP181225b	34.1841	4.89803	5.90255e-11	0.503691
PEP181226a	220.301	86.168	0.0114132	0.634477
PEP181226b	105.22	19.229	1.51197e-07	0.54515
PEP190204a	-0.799335	1.6802	0.634867	0.480818
PEP190204b	-3.97571	1.62221	0.0152258	0.589187
PEP200181	24.5384	5.10608	3.27716e-06	0.429724
PEP200182	50.2757	7.51704	2.9268e-10	0.448539
PEP200204	-33.8989	9.23704	0.000321945	0.479338
PEP200226	84.6378	7.49306	1.42985e-22	0.614969
PEP201204	-12.7995	9.68957	0.188242	0.51855
PEP201226	49.387	7.08286	6.11674e-11	0.623916
PG341	131.167	7.83272	2.44942e-38	0.476969
PG342	17.7748	1.84001	5.35089e-18	0.468085
PG361	24.4432	2.06291	3.44119e-24	0.424336
PG362	21.4389	2.23505	8.59345e-18	0.409636
PI15MHDA_181PI170_181	70.8416	9.03534	4.04729e-13	0.545619
PI15MHDA_182PI170_182	98.5926	8.25254	1.79491e-24	0.466119
PI15MHDA_204PI170_204	51.7764	8.87865	2.55398e-08	0.349289
PI160160	932.462	61.5577	1.01512e-33	0.510665
PI160_161	507.606	47.7141	1.00274e-20	0.574475
PI160_203a	400.214	29.3941	2.3999e-29	0.419612
PI160_203b	97.6662	9.24102	1.58061e-20	0.375467
PI160_204	1145.65	128.993	7.2764e-16	0.340911
PI180_181	2325.41	143.647	9.32628e-37	0.403573
PI180_202	260.279	18.0843	1.34043e-31	0.610811
PI180_203a	903.655	93.0021	3.73158e-18	0.645131
PI180_203b	254.222	24.3328	3.47732e-20	0.654971
PI180_204	3236.75	614.271	3.94833e-07	0.517498
PI180_224	126.093	10.4584	8.66458e-25	0.535085
PI180_225n3	137.299	46.0856	0.00329581	0.545545
PI180_225n6	235.708	16.77	1.27033e-30	0.502105
PI180_226	971.152	78.6949	1.20654e-25	0.567452
PI181_182	324.967	34.1753	1.45918e-17	0.611861
PI200_204	18.1462	4.0849	1.57427e-05	0.467545
PI340	318.529	17.5136	2.30076e-42	0.570492
PI341	3380.59	205.402	1.59574e-37	0.575556
PI362	7880.2	588.034	1.00734e-28	0.558542
PI376	2.02212	1.0086	0.0464991	0.49839
PI385a	192.259	25.8148	4.01518e-12	0.396747
PI385b	211.964	25.3389	1.78749e-14	0.494983
PI386	259.367	26.9653	6.9795e-18	0.540623
PI396	15.8008	2.27682	7.13814e-11	0.471467
PS361	-108.154	56.4664	0.0570581	0.0630085
PS362	4.92319	18.6502	0.792107	0.146313
PS383	-16.8267	16.6518	0.313633	0.0457128
PS384	-197.477	64.0526	0.00237732	0.0300559
PS385	-2.77701	2.64337	0.294894	0.0917372
PS405	0.173106	8.97357	0.984631	0.144018
PS406	35.4123	6.54358	2.00668e-07	0.360779
S1Pd161	0.577487	2.63737	0.826931	0.481639
S1Pd180	-3.44108	1.7767	0.0543648	0.379391
S1Pd181	38.8069	19.0944	0.0436103	0.485259
S1Pd182	-2.20727	5.10006	0.665692	0.533996
SM343	16.5225	1.53777	4.74768e-21	0.624756
SM352b	33.7742	3.03774	4.31523e-22	0.589052
SM371	115.27	40.9159	0.00539425	0.637651
SM372	25.3527	7.18809	0.000535264	0.577664
SM383a	32.972	7.69498	2.99632e-05	0.582105
SM383b	5.42391	3.44837	0.117529	0.58264
SM403a	171.252	24.8606	9.49416e-11	0.558876
SM403b	158.146	19.3374	5.39582e-14	0.707519
SM410	98.0618	8.77777	2.85485e-22	0.484027
SM411a	30.085	7.18723	4.46895e-05	0.683068
SM431	21.5125	23.6428	0.364115	0.540792
SM432b	75.2537	14.0586	2.65825e-07	0.569685
SM432c	15.289	7.87114	0.0536738	0.485487
SM441	-7.35907	4.45922	0.100654	0.455088
SM442	-0.191301	7.08233	0.978481	0.450889
SM443	-14.9065	5.60259	0.00851595	0.540036
SMd161190	24.7854	17.754	0.164449	0.68654
SMd161230SMd171220	988.761	91.2235	2.55456e-21	0.608062
SMd161241	1084.33	115.84	3.59763e-17	0.599841
SMd171140	33.8921	4.95475	1.23917e-10	0.718344
SMd171160	897.928	93.2448	6.49589e-18	0.648752
SMd171241	701.211	79.7957	1.3032e-15	0.645477
SMd180140	64.6143	6.03725	6.2465e-21	0.588005
SMd180160	440.847	82.8144	3.05873e-07	0.479796
SMd180220	150.25	11.9264	2.16283e-26	0.645338
SMd181140SMd161160	1803.08	145.307	7.65932e-26	0.633007
SMd181160	22672.4	2186.8	5.56142e-20	0.350102
SMd181170SMd171180	-22.8244	24.7057	0.356822	0.630858
SMd181180SMd161200	3419.8	325.764	2.3847e-20	0.57263
SMd181200SMd161220	2873.4	227.56	1.7826e-26	0.511339
SMd181220SMd161240	5653.65	430.181	5.67362e-28	0.567382
SMd181230SMd171240	2311.82	183.792	2.46543e-26	0.495989
SMd181240	3792.91	401.408	2.05387e-17	0.488869
SMd181241	8095.66	794.15	1.71912e-19	0.515904
SMd182140	145.71	14.1833	1.02772e-19	0.6781
SMd182160	2972.53	219.204	3.46331e-29	0.501938
SMd182170	41.9942	6.43175	6.75435e-10	0.652397
SMd182180	1398.94	172.365	7.83658e-14	0.578681
SMd182181	92.516	11.8007	4.06226e-13	0.567807
SMd182200	384.635	85.22	1.16012e-05	0.544483
SMd182220	2003.42	193.823	6.82587e-20	0.633719
SMd182230	908.339	90.48	4.68722e-19	0.574837
SMd182240	1036.44	160.883	1.07657e-09	0.50576
SMd191241	19.7997	36.7978	0.591206	0.675293
Sphd161	0.141794	0.0721726	0.0510205	0.296784
Sphd181	1.1716	0.382582	0.00253895	0.408586
Sphd182	-0.0306574	0.0790993	0.698791	0.492189
Sulfatided181160	57.3459	8.84044	8.48313e-10	0.548328
Sulfatided181160OH	13.8975	3.71646	0.000248854	0.545485
Sulfatided181180	2.54727	0.969823	0.00938213	0.18006
Sulfatided181180OH	1.33873	0.644202	0.0391418	0.138494
Sulfatided181240	2.79878	1.04136	0.00788301	0.198381
Sulfatided181240OH	2.44796	1.73617	0.160302	0.449291
Sulfatided181241	2.91064	1.77055	0.101968	0.291259
Sulfatided181241OH	1.24077	1.88397	0.511014	0.252782
TG480NL160	2922.68	336.199	2.33402e-15	0.495262
TG480NL180	120.769	47.7922	0.0123814	0.115772
TG481NL161	134.578	14.3789	3.62337e-17	0.515006
TG481NL181	3111.24	339.652	1.27458e-16	0.334212
TG482NL140	1905.54	159.022	1.31234e-24	0.494869
TG482NL141	284.258	39.7792	2.24873e-11	0.51209
TG482NL161	2436.12	260.321	3.6537e-17	0.54015
TG482NL182	1888.21	173.216	1.69932e-21	0.488256
TG483NL140	478.177	44.558	5.16638e-21	0.505559
TG483NL161	683.419	73.35	4.73285e-17	0.512313
TG483NL183	373.867	40.9609	1.56481e-16	0.440942
TG491NL161	41.2293	6.63992	3.68313e-09	0.458663
TG491NL171	289.112	30.0907	7.46467e-18	0.561632
TG500NL180	1167.33	155.574	2.90921e-12	0.348255
TG501NL140	59.2123	18.0681	0.00126197	0.107
TG501NL160	9747.2	821.864	2.97582e-24	0.500049
TG501NL181	6590.52	582.549	1.11944e-22	0.4555
TG502NL140	430.31	98.8139	2.25029e-05	0.0762875
TG502NL161	2211.18	246.671	4.34905e-16	0.511274
TG502NL181	3917.74	457.822	5.3869e-15	0.387483
TG502NL182	2013.29	186.096	2.91951e-21	0.532804
TG503NL140	1084.18	141.333	1.09594e-12	0.187162
TG503NL141	42.3007	9.63058	1.92649e-05	0.37113
TG503NL161	2146.17	236.982	2.44466e-16	0.47179
TG503NL182	2388.22	237.519	4.23443e-19	0.456967
TG503NL183	585.641	54.429	4.29524e-21	0.543198
TG504NL140	596.24	72.3904	3.79828e-14	0.598544
TG504NL183	721.384	69.155	3.67596e-20	0.473738
TG504NL204	169.267	22.7369	4.08601e-12	0.513242
TG510NL160	131.623	22.765	3.2773e-08	0.230504
TG511NL170	295.62	36.2379	6.10354e-14	0.456716
TG512NL150	192.86	34.7897	1.06159e-07	0.33495
TG512NL170	859.794	88.1599	2.96003e-18	0.548509
TG512NL171	859.794	88.1599	2.96003e-18	0.548509
TG521NL180	4169.42	391.658	9.07499e-21	0.359064
TG521NL181	367.882	97.4732	0.000218849	0.0352446
TG522NL160	3369.56	629.771	2.6889e-07	-0.0353432
TG522NL182	348.094	44.4904	4.46105e-13	0.43691
TG523NL161	80.0116	97.9108	0.414919	0.295759
TG523NL182	2384.9	568.989	4.37046e-05	0.149852
TG524NL161	393.474	123.202	0.00166273	0.251472
TG524NL182	2353.08	629.391	0.000249571	0.473643
TG524NL183	1210.62	143.92	1.3119e-14	0.33968
TG525NL183	908.806	110.219	3.59655e-14	0.485044
TG525NL204	313.801	48.3088	8.08544e-10	0.494317
TG525NL205	39.1215	6.26145	3.00816e-09	0.529106
TG532NL171	16.0537	3.41677	5.24485e-06	0.215043
TG532NL181	520.873	87.814	1.54088e-08	0.265149
TG540NL180	79.5451	27.0886	0.0037609	0.0106269
TG541NL181	394.58	75.7309	5.20603e-07	0.0582235
TG542NL180	2123.53	300.823	3.66639e-11	0.19197
TG542NL201	1029.2	72.9999	9.51737e-31	0.438242
TG543NL181	-1126.48	849.465	0.186513	0.376414
TG543NL182	117.08	68.2072	0.0878131	0.309107
TG544NL182	-317.305	229.965	0.169389	0.372581
TG544NL203	314.647	45.28	6.78772e-11	0.35857
TG545NL183	107.728	101.734	0.291079	0.276968
TG545NL204	161.727	63.2783	0.0114347	0.532472
TG546NL183	273.88	104.009	0.0092061	0.385793
TG546NL204	198.03	57.2719	0.000682293	0.562957
TG546NL205	31.9662	16.4452	0.0535051	0.490696
TG546NL226	334.465	34.0289	1.81579e-18	0.58494
TG547NL205	51.3317	13.8479	0.000280527	0.466099
TG547NL226	392.526	48.3917	8.0619e-14	0.512743
TG566NL204	-127.506	20.3982	2.96322e-09	0.407583
TG566NL225a	29.3053	21.1471	0.167557	0.423132
TG566NL225b	29.3053	21.1471	0.167557	0.423132
TG567NL204	-101.167	27.1324	0.000258943	0.54965
TG567NL205	-15.2148	6.99857	0.0310335	0.488478
TG567NL225a	79.5297	19.5557	7.16366e-05	0.477756
TG567NL225b	80.5337	19.7006	6.59536e-05	0.481289
TG567NL226	615.926	101.107	6.78014e-09	0.583214
TG568NL204	35.5308	18.145	0.051783	0.637919
TG568NL205	4.30306	7.89564	0.586445	0.485021
TG568NL226	579.696	89.1861	7.90881e-10	0.630994
TG569NL226	90.3859	16.0111	6.45572e-08	0.547718
TG5810NL226	35.6789	12.6684	0.00540847	0.624932
TG588NL226	39.311	27.887	0.160397	0.557208
TG589NL226	51.0316	27.8284	0.0683634	0.577437
TGO501NL150	4.01307	0.516346	6.06054e-13	0.278056
TGO501NL160	40.2656	3.57874	1.68574e-22	0.419427
TGO501NL171	5.22448	0.805568	8.54294e-10	0.136406
TGO501NL181	19.0938	2.13655	5.15712e-16	0.408296
TGO502NL161	1.16365	0.485175	0.0175053	-0.0368777
TGO502NL181	2.14079	0.471909	1.05239e-05	0.272394
TGO502NL182	4.85085	0.640277	1.90697e-12	0.210601
TGO503NL182	0.372913	0.273444	0.174374	0.248267
TGO520NL160	131.623	22.765	3.2773e-08	0.230504
TGO521NL160	17.5384	1.7367	3.18951e-19	0.287849
TGO521NL181	14.6034	1.92033	1.6156e-12	0.308558
TGO522NL160	20.9218	1.78665	8.0602e-24	0.44947
TGO522NL171	18.4643	1.84442	5.62365e-19	0.336266
TGO522NL181	24.9738	2.36458	1.57137e-20	0.462498
TGO542NL171	1.1932	0.429809	0.00609308	0.10224
TGO542NL181	11.1898	1.11456	4.67213e-19	0.316406
TGO543NL171	0.983301	0.289944	0.000857822	0.131274
TGO543NL181	5.72898	0.823318	6.43814e-11	0.198904
TGO544NL171	0.691451	0.243866	0.00511016	0.200449
TGO544NL182	1.79984	0.428027	4.13975e-05	0.406306
Ubiquinone	3224.46	344.869	3.85121e-17	0.565938
dhCerd180160	9.16177	1.41672	9.43588e-10	-0.0113789
dhCerd180180	2.51424	0.431644	2.64209e-08	0.378894
dhCerd180200	13.9563	1.68145	2.584e-14	0.350653
dhCerd180220	73.3771	6.30094	1.23809e-23	0.531973
dhCerd180240	64.46	5.484	6.00964e-24	0.448847
dhCerd180241	60.2276	5.8051	5.31061e-20	0.44311
